# Supplementary material for: Patient-Reported Financial Distress in Cancer: A Systematic Review of Risk Factors in Universal Healthcare Systems
Source: MDPI journal article supplement (doi:10.3390/cancers13195015), 2021-10-07
Supplement: s1 [file s1]

## Supplementary material

### Supplementary material 1: Search strategy

*Search strategy for Pubmed performed up to December 2020*

((Cancer\*[Title/Abstract]) OR (Tumor\*[Title/Abstract]) OR (Oncolog\*[Title/Abstract]) OR (Neoplas\*[Title/Abstract]) OR (Carcinoma\*[Title/Abstract]))

AND

((("Financial distress"[Title/Abstract]) OR ("Financial difficult\*[Title/Abstract]) OR ("Financial consequence\*[Title/Abstract]) OR ("Financial toxicit\*[Title/Abstract]) OR ("Financial hardship\*[Title/Abstract]) OR ("Financial stress"[Title/Abstract]) OR ("Financial burden"[Title/Abstract]) OR ("Financial strain"[Title/Abstract]) OR ("Financial worr\*[Title/Abstract]) OR ("Financial catastrophe"[Title/Abstract]) OR ("Financial constraint\*[Title/Abstract]) OR ("Financial well-being"[Title/Abstract]) OR ("Financial support"[Title/Abstract]) OR (Bankrupt\*[Title/Abstract]) OR (Insolvency[Title/Abstract]) OR ("Financial problem\*[Title/Abstract]) OR ("Financial effect\*[Title/Abstract]) OR ("Financial issue\*[Title/Abstract]))

Filter: English, German

Search strategy was adjusted to PsycInfo and CINAHL including similar search terms and restrictions.

## Supplementary material 2: Study characteristics

**Table S2:** Study characteristics

| Study                         | Study Design          | Country      | Time point of measurement                                                                               | Sample size | Cancer entity                                                                                                                                                  | Age                | Gender                   |
|-------------------------------|-----------------------|--------------|---------------------------------------------------------------------------------------------------------|-------------|----------------------------------------------------------------------------------------------------------------------------------------------------------------|--------------------|--------------------------|
| <i>Quantitative studies</i>   |                       |              |                                                                                                         |             |                                                                                                                                                                |                    |                          |
| Akechi et al. (2012) [1]      | Cross sectional study | Japan        | Any time point after diagnosis                                                                          | N= 619      | <ul style="list-style-type: none"> <li>Gynaecological</li> <li>Gastrointestinal</li> <li>Haematological malignancies</li> <li>Thorac</li> <li>Other</li> </ul> | <70: 506, >70: 113 | Female: 536, Male: 83    |
| Arndt et al. (2004) [2]       | Cross sectional study | Germany      | 1 year after diagnosis                                                                                  | N= 309      | <ul style="list-style-type: none"> <li>Gastrointestinal</li> </ul>                                                                                             | Mean: 65.1 (18-80) | Female: 135, Male: 174   |
| Arndt et al. (2017) [3]       | Cross sectional study | Germany      | Cancer during 1994–2004, survived cancer at least 5 years were recruited in 2009–2011                   | N= 8830     | <ul style="list-style-type: none"> <li>Gynaecological</li> <li>Gastrointestinal</li> <li>Urogenital</li> </ul>                                                 | Mean: 67.3         | Female: 4294; Male: 4536 |
| Arndt et al. (2019) [4]       | Cross sectional study | Germany      | Cancer during 1994–2004, survived cancer at least 5 years were recruited in 2009–2011                   | N= 2163     | <ul style="list-style-type: none"> <li>Gynaecological</li> <li>Gastrointestinal</li> <li>Urogenital</li> </ul>                                                 | Mean: 50.1 (18-59) | Female: 1191, Male: 972  |
| Barbarete et al. (2017) [5]   | Cross sectional study | France       | Outpatients or hospitalized patients                                                                    | N= 143      | <ul style="list-style-type: none"> <li>Gynaecological</li> <li>Gastrointestinal</li> <li>Thorac</li> <li>Urogenital</li> </ul>                                 | Mean: 58           | Female: 67, Male: 76     |
| Barbarete et al. (2019) [6]   | Cross sectional study | France & USA | Outpatients or hospitalized patients                                                                    | N= 143      | <ul style="list-style-type: none"> <li>Gynaecological</li> <li>Gastrointestinal</li> <li>Thorac</li> <li>Urogenital</li> </ul>                                 | Mean: 58           | Female: 70, Male: 73     |
| Büttner et al. (2019) [7]     | Cohort study          | Germany      | At the end of their hospital stay (t0), with follow up 3 (t1), and 15 (t2) months after t0              | N= 502      | <ul style="list-style-type: none"> <li>Gynaecological</li> <li>Gastrointestinal</li> <li>Head and Neck</li> <li>Urogenital</li> <li>Other</li> </ul>           | Mean: 45.9 (19-57) | Female: 234, Male: 268   |
| Doege et al. (2019) [8]       | Cross sectional study | Germany      | Long-term cancer survivors diagnosed between 1994 and 2004                                              | N= 3652     | <ul style="list-style-type: none"> <li>Gynaecological</li> </ul>                                                                                               | Mean: 63.6         | Female only              |
| Egestad and Nieder (2015) [9] | Cohort study          | Norway       | At baseline: first week of radiation treatment, and during the last week after administration of 60 Gy. | N= 67       | <ul style="list-style-type: none"> <li>Head and Neck</li> </ul>                                                                                                | Mean: 60           | Female: 18, Male: 49     |

|                                 |                       |                     |                                                                                                                                                                   |         |                                                               |                                        |                         |
|---------------------------------|-----------------------|---------------------|-------------------------------------------------------------------------------------------------------------------------------------------------------------------|---------|---------------------------------------------------------------|----------------------------------------|-------------------------|
| Ezeife et al. (2018) [9,10]     | Cross sectional study | Canada              | Diagnosis at least 3 months + receiving treatment                                                                                                                 | N= 200  | • Thorac                                                      | 32-86                                  | Female: 111, Male: 88   |
| Gordon et al. (2017a) [11]      | Cross sectional study | Australia           | No restrictions                                                                                                                                                   | N= 289  | • Urogenital                                                  | Mean: 65.1                             | Men only                |
| Gordon et al. (2017b) [12]      | Cohort study          | Australia           | 6 months (T0) and 12 months (T1) post-colorectal cancer diagnosis                                                                                                 | N= 187  | • Gastrointestinal                                            | Mean: 56.3 (45-64)                     | Female: 64, Male: 123   |
| Gordon et al. (2020) [13]       | Cross sectional study | Australia           | No restrictions                                                                                                                                                   | N= 204  | • Gastrointestinal                                            | Mean: 58.7 (18 -83)                    | Female: 102, Male: 102  |
| Hanly et al. (2018) [14]        | Cross sectional study | Ireland             | Diagnosed October 2007 to September 2009 and still alive in January 2010                                                                                          | N= 496  | • Gastrointestinal                                            | <65: 199, 65-74: 167, 75+: 130         | Female: 186, Male: 310  |
| Honda et al. (2019) [15]        | Cross sectional study | Japan               | Patients receiving anticancer drug therapy                                                                                                                        | N= 156  | • Gastrointestinal<br>• Head and Neck<br>• Other              | Mean: 67 (30-87)                       | Female: 73, Male: 83    |
| Ivanauskienė et al. (2014) [16] | Cross sectional study | Lithuania           | Diagnosis registered between January 1, 2011 and December 31, 2011                                                                                                | N= 338  | • Gynaecological                                              | Mean: 58.6 (28–95)                     | Female only             |
| Kapteijn et al. (2013) [17]     | Cohort study          | Japan & Netherlands | Before their first chemotherapy course (t0), one week after their first chemotherapy course (t1), and 8 weeks after the start of chemotherapy (t2)                | N= 43   | • Gynaecological                                              | Mean: 48.3 (35-68)                     | Not reported            |
| Koch et al. (2013) [18]         | Cohort study          | Germany             | Baseline (a few days after diagnosis) and four follow-up time-points after one (FU1), three (FU3), five to seven (FU5), and 10 to 12 (FU10) years post-diagnosis. | N= 387  | • Gynaecological                                              | Mean t0: 57,9; Mean t10: 55, 6 (18-80) | Female only             |
| Koskinen et al. (2019) [19]     | Cross sectional study | Finland             | All disease states from diagnosis to end-of-life care                                                                                                             | N= 1978 | • Gynaecological<br>• Gastrointestinal<br>• Urogenital        | Median: 66                             | Female: 905, Male: 1073 |
| Lu et al. (2019) [20]           | Cross sectional study | Ireland             | At least 8 months post diagnosis                                                                                                                                  | N= 531  | • Head and Neck                                               | <50: 142, 50-64: 254, >64: 133         | Female: 170, Male: 361  |
| Mandaliya et al. (2016) [21]    | Cross sectional study | Australia           | 3 to 5 years since last treatment                                                                                                                                 | N= 45   | • Gynaecological<br>• Gastrointestinal<br>• Thorac<br>• Other | Not reported                           | Female: 29, Male: 16    |
| McLean et al. (2020) [22]       | Cross sectional study | Australia           | Patients actively receiving systemic therapy                                                                                                                      | N= 53   | • Other                                                       | Median: 63.5                           | Female: 29, Male: 24    |

|                               |                       |             |                                                                                                               |         |                                                                                                                                                                                                                        |                       |                          |
|-------------------------------|-----------------------|-------------|---------------------------------------------------------------------------------------------------------------|---------|------------------------------------------------------------------------------------------------------------------------------------------------------------------------------------------------------------------------|-----------------------|--------------------------|
| McNeil et al. (2019) [23]     | Cross sectional study | Australia   | Six to 24 months from diagnosis                                                                               | N= 196  | <ul style="list-style-type: none"> <li>• Haematological malignancies</li> <li>• Head and Neck</li> <li>• Skin</li> <li>• Urogenital</li> <li>• Other</li> </ul>                                                        | Mean: 21.6 (15-27)    | Female: 97, Male: 99     |
| Mehlis et al. (2020) [24]     | Cross sectional study | Germany     | Cancer patients with ongoing disease                                                                          | N= 247  | <ul style="list-style-type: none"> <li>• Gastrointestinal</li> </ul>                                                                                                                                                   | Median: 63            | Female: 88; Male: 159    |
| Mercadante et al. (2020) [25] | Cross sectional study | Italy       | Not reported                                                                                                  | N= 236  | <ul style="list-style-type: none"> <li>• Gynaecological</li> <li>• Gastrointestinal</li> <li>• Head and Neck</li> <li>• Thorac</li> <li>• Urogenital</li> <li>• Other</li> </ul>                                       | Mean: 63.9            | Female: 122, Male: 114   |
| Paul et al. (2013) [26]       | Cross sectional study | Australia   | Diagnosed in the previous 3 years                                                                             | N= 268  | <ul style="list-style-type: none"> <li>• Haematological malignancies</li> </ul>                                                                                                                                        | Mean: 59.5            | Female: 111, Male: 157   |
| Pearce et al. (2019) [27]     | Cross sectional study | Netherlands | Cancer survivors who participated in cross-sectional and longitudinal studies conducted between 2004 and 2015 | N= 2931 | <ul style="list-style-type: none"> <li>• Haematological malignancies</li> <li>• Gynaecological</li> <li>• Gastrointestinal</li> <li>• Head and Neck</li> <li>• Skin</li> <li>• Urogenital</li> </ul>                   | Mean: 55.3            | Female: 1471, Male: 1460 |
| Schmidt et al. (2019) [28]    | Cohort study          | Germany     | Newly diagnosed patients between 2010 and 2013 (t0), 5 year after surgery (t1)                                | N= 137  | <ul style="list-style-type: none"> <li>• Gynaecological</li> <li>• Urogenital</li> </ul>                                                                                                                               | Mean: 50.5            | Female only              |
| Sharp and Timmons (2016) [29] | Cross sectional study | Ireland     | Diagnosed with cancer 3–24 months previously                                                                  | N= 698  | <ul style="list-style-type: none"> <li>• Gynaecological</li> <li>• Urogenital</li> </ul>                                                                                                                               | Mean: 57.5            | Female: 486, Male: 212   |
| Zucca et al. (2011) [30]      | Cohort study          | Australia   | 6 and 12 months after diagnosis                                                                               | N= 1410 | <ul style="list-style-type: none"> <li>• Haematological malignancies</li> <li>• Gynaecological</li> <li>• Gastrointestinal</li> <li>• Head and Neck</li> <li>• Skin</li> <li>• Thorac</li> <li>• Urogenital</li> </ul> | 18-80                 | Female: 567, Male: 843   |
| <i>Qualitative studies</i>    |                       |             |                                                                                                               |         |                                                                                                                                                                                                                        |                       |                          |
| Amir et al. (2012) [31]       | Cross sectional study | England     | At least 16 weeks post-diagnosis                                                                              | N= 40   | <ul style="list-style-type: none"> <li>• Unspecified</li> </ul>                                                                                                                                                        | 20-89                 | Female: 21, Male: 19     |
| Bennett et al. (2009) [32]    | Cross sectional study | New Zealand | 6–24 months since diagnosis                                                                                   | N= 68   | <ul style="list-style-type: none"> <li>• Unspecified</li> </ul>                                                                                                                                                        | Men 52.3 (22–74)      | Female: 47, Male: 21     |
| Fitch and Longo (2018) [33]   | Cross sectional study | Canada      | Receiving active treatment for at least a month                                                               | N= 14   | <ul style="list-style-type: none"> <li>• Gynaecological</li> <li>• Gastrointestinal</li> <li>• Thorac</li> <li>• Urogenital</li> </ul>                                                                                 | Average: 51.7 (37-78) | Not reported             |

|                                     |                       |           |                                                                                                                |        |                                                                                                                                        |                                    |                        |
|-------------------------------------|-----------------------|-----------|----------------------------------------------------------------------------------------------------------------|--------|----------------------------------------------------------------------------------------------------------------------------------------|------------------------------------|------------------------|
| Fitch et al. (2020) [34]            | Cross sectional study | Canada    | Minimum of 4 weeks of cancer treatment still on active treatment +a subset of patients beyond active treatment | N= 378 | <ul style="list-style-type: none"> <li>• Gynaecological</li> <li>• Gastrointestinal</li> <li>• Thorac</li> <li>• Urogenital</li> </ul> | 18-24: 20; 35-54: 102; 55+: 256    | Female: 227, Male: 151 |
| Gray et al. (2004) [35]             | Cross sectional study | Canada    | No restrictions                                                                                                | N= 276 | <ul style="list-style-type: none"> <li>• Gynaecological</li> </ul>                                                                     | <50 years: 78; 50+ years: 199      | Female only            |
| Grinyer (2007) [36]                 | Cross sectional study | England   | Between the ages of 15 and 25 years when diagnosed with cancer                                                 | N= 20  | <ul style="list-style-type: none"> <li>• Unspecified</li> </ul>                                                                        | 16-26                              | Not reported           |
| Kane et al. (2020) [37]             | Cross sectional study | Canada    | No restrictions                                                                                                | N= 8   | <ul style="list-style-type: none"> <li>• Gynaecologica</li> <li>• Haematological malignancies</li> </ul>                               | 45-62                              | Female: 7, male: 1     |
| McGrath (1999) [38]                 | Cross sectional study | Australia | No restrictions                                                                                                | N= 18  | <ul style="list-style-type: none"> <li>• Gynaecological</li> </ul>                                                                     | 35-49: 33%, 50-64: 50%, >65: 17%   | Female only            |
| McGrath (2000) [39]                 | Cross sectional study | Australia | Not stated                                                                                                     | N= 10  | <ul style="list-style-type: none"> <li>• Haematological malignancies</li> </ul>                                                        | 17-53                              | Female: 8, Male: 2     |
| Moffatt et al. (2010) [40]          | Cross sectional study | England   | Patients between June 2008 and March 2009 using welfare rights service                                         | N= 22  | <ul style="list-style-type: none"> <li>• Unspecified</li> </ul>                                                                        | 35-83                              | Female: 11, Male: 11   |
| Moffatt et al. (2012) [41]          | Cross sectional study | England   | Cancer patients who accessed welfare service between April 2009 and March 2010.                                | N= 36  | <ul style="list-style-type: none"> <li>• Unspecified</li> </ul>                                                                        | Median: 62                         | Female: 17, Male: 19   |
| Moffatt and Noble (2015) [42]       | Cohort study          | England   | Cancer patients who accessed welfare service between April 2009 and March 2010.                                | N= 23  | <ul style="list-style-type: none"> <li>• Unspecified</li> </ul>                                                                        | 32-62                              |                        |
| Schröder et al. (2020) [43]         | Cross sectional study | Germany   | Had completed acute treat- ment for cancer within the last 5 years                                             | N= 39  | <ul style="list-style-type: none"> <li>• Gynaecological</li> <li>• Gastrointestinal</li> <li>• Thorac</li> <li>• Urogenital</li> </ul> | 40-86                              | Female: 18, Male: 21   |
| Slavova-Azmanova et al. (2020) [44] | Cross sectional study | Australia | Participated in a cross-sectional survey between 2014 and 2017                                                 | N= 300 | <ul style="list-style-type: none"> <li>• Gynaecological</li> <li>• Gastrointestinal</li> <li>• Thorac</li> <li>• Urogenital</li> </ul> | Mean: 64                           | Female: 155, Male: 145 |
| Timmons et al. (2013a) [45]         | Cross sectional study | Ireland   | Completed initial treatment                                                                                    | N= 20  | <ul style="list-style-type: none"> <li>• Gynaecological</li> <li>• Thorac</li> <li>• Urogenital</li> </ul>                             | >50: 7, 50-59: 8, 60-69: 4, >70: 1 | Female: 14, Male: 6    |
| Timmons et al. (2013b) [46]         | Cross sectional study | Ireland   | Post- initial treatment                                                                                        | N= 20  | <ul style="list-style-type: none"> <li>• Gynaecological</li> <li>• Thorac</li> <li>• Urogenital</li> </ul>                             | >50: 7, 50-59: 8, 60-69: 4, >70: 1 | Female: 14, Male: 6    |

## References

1. Akechi, T.; Okuyama, T.; Uchida, M.; Nakaguchi, T.; Ito, Y.; Yamashita, H.; Toyama, T.; Komatsu, H.; Kizawa, Y.; Wada, M. Perceived needs, psychological distress and quality of life of elderly cancer patients. *Jpn. J. Clin. Oncol.* **2012**, *42*, 704–710, doi:10.1093/jjco/hys075.
2. Arndt, V.; Merx, H.; Stegmaier, C.; Ziegler, H.; Brenner, H. Quality of life in patients with colorectal cancer 1 year after diagnosis compared with the general population: a population-based study. *J. Clin. Oncol.* **2004**, *22*, 4829–4836, doi:10.1200/JCO.2004.02.018.
3. Arndt, V.; Koch-Gallenkamp, L.; Jansen, L.; Bertram, H.; Eberle, A.; Holleczeck, B.; Schmid-Höpfner, S.; Waldmann, A.; Zeissig, S.R.; Brenner, H. Quality of life in long-term and very long-term cancer survivors versus population controls in Germany. *Acta Oncol.* **2017**, *56*, 190–197, doi:10.1080/0284186X.2016.1266089.
4. Arndt, V.; Koch-Gallenkamp, L.; Bertram, H.; Eberle, A.; Holleczeck, B.; Pritzkeleit, R.; Waldeyer-Sauerland, M.; Waldmann, A.; Zeissig, S.R.; Doege, D.; et al. Return to work after cancer. A multi-regional population-based study from Germany. *Acta Oncol.* **2019**, *58*, 811–818, doi:10.1080/0284186X.2018.1557341.
5. Barbaret, C.; Brosse, C.; Rhondali, W.; Ruer, M.; Monsarrat, L.; Michaud, P.; Schott, A.M.; Delgado-Guay, M.; Bruera, E.; Sanchez, S.; et al. Financial distress in patients with advanced cancer. *PLoS One* **2017**, *12*, e0176470, doi:10.1371/journal.pone.0176470.
6. Barbaret, C.; Delgado-Guay, M.O.; Sanchez, S.; Brosse, C.; Ruer, M.; Rhondali, W.; Monsarrat, L.; Michaud, P.; Schott, A.M.; Bruera, E.; et al. Inequalities in Financial Distress, Symptoms, and Quality of Life Among Patients with Advanced Cancer in France and the U.S. *Oncologist* **2019**, *24*, 1121–1127, doi:10.1634/theoncologist.2018-0353.
7. Büttner, M.; König, H.-H.; Löbner, M.; Briest, S.; Konnopka, A.; Dietz, A.; Riedel-Heller, S.; Singer, S. Out-of-pocket-payments and the financial burden of 502 cancer patients of working age in Germany: results from a longitudinal study. *Support. Care Cancer* **2019**, *27*, 2221–2228, doi:10.1007/s00520-018-4498-1.
8. Doege, D.; Thong, M.S.-Y.; Koch-Gallenkamp, L.; Bertram, H.; Eberle, A.; Holleczeck, B.; Pritzkeleit, R.; Waldeyer-Sauerland, M.; Waldmann, A.; Zeissig, S.R.; et al. Health-related quality of life in long-term disease-free breast cancer survivors versus female population controls in Germany. *Breast Cancer Res. Treat.* **2019**, *175*, 499–510, doi:10.1007/s10549-019-05188-x.
9. Egestad, H.; Nieder, C. Undesirable financial effects of head and neck cancer radiotherapy during the initial treatment period. *Int. J. Circumpolar Health* **2015**, *74*, 26686, doi:10.3402/ijch.v74.26686.
10. Ezeife, D.A.; Morganstein, B.J.; Lau, S.; Law, J.H.; Le, L.W.; Bredle, J.; Cella, D.; Doherty, M.K.; Bradbury, P.; Liu, G.; et al. Financial Burden Among Patients With Lung Cancer in a Publically Funded Health Care System. *Clin. Lung Cancer* **2019**, *20*, 231–236, doi:10.1016/j.clc.2018.12.010.
11. Gordon, L.G.; Walker, S.M.; Mervin, M.C.; Lowe, A.; Smith, D.P.; Gardiner, R.A.; Chambers, S.K. Financial toxicity: a potential side effect of prostate cancer treatment among Australian men. *Eur. J. Cancer Care (Engl)* **2017**, *26*, doi:10.1111/ecc.12392.
12. Gordon, L.G.; Beesley, V.L.; Mihala, G.; Koczwara, B.; Lynch, B.M. Reduced employment and financial hardship among middle-aged individuals with colorectal cancer. *Eur. J. Cancer Care (Engl)* **2017**, *26*, doi:10.1111/ecc.12744.
13. Gordon, L.G.; Elliott, T.M.; Wakelin, K.; Leyden, S.; Leyden, J.; Michael, M.; Pavlakis, N.; Mumford, J.; Segelov, E.; Wyld, D.K. The Economic Impact on Australian Patients with Neuroendocrine Tumours. *Patient* **2020**, *13*, 363–373, doi:10.1007/s40271-020-00412-z.
14. Hanly, P.; Maguire, R.; Ceilleachair, A.O.; Sharp, L. Financial hardship associated with colorectal cancer survivorship: The role of asset depletion and debt accumulation. *Psychooncology* **2018**, *27*, 2165–2171, doi:10.1002/pon.4786.
15. Honda, K.; Gyawali, B.; Ando, M.; Kumanishi, R.; Kato, K.; Sugiyama, K.; Mitani, S.; Masuishi, T.; Narita, Y.; Bando, H.; et al. Prospective Survey of Financial Toxicity Measured by the Comprehensive Score for Financial Toxicity in Japanese Patients With Cancer. *J. Glob. Oncol.* **2019**, *5*, 1–8, doi:10.1200/JGO.19.00003.
16. Ivanauskienė, R.; Padaiga, Ž.; Šimoliūnienė, R.; Smailytė, G.; Domeikienė, A. Well-being of newly diagnosed women with breast cancer: which factors matter more? *Support. Care Cancer* **2014**, *22*, 519–526, doi:10.1007/s00520-013-2005-2.
17. Kaptein, A.A.; Yamaoka, K.; Snoei, L.; van der Kloot, W.A.; Inoue, K.; Tabei, T.; Kroep, J.R.; Krol-Warmerdam, E.; Ranke, G.; Meirink, C.; et al. Illness perceptions and quality of life in Japanese and Dutch women with breast cancer. *J. Psychosoc. Oncol.* **2013**, *31*, 83–102, doi:10.1080/07347332.2012.741092.
18. Koch, L.; Jansen, L.; Herrmann, A.; Stegmaier, C.; Holleczeck, B.; Singer, S.; Brenner, H.; Arndt, V. Quality of life in long-term breast cancer survivors - a 10-year longitudinal population-based study. *Acta Oncol.* **2013**, *52*, 1119–1128, doi:10.3109/0284186X.2013.774461.
19. Koskinen, J.-P.; Färkkilä, N.; Sintonen, H.; Saarto, T.; Taari, K.; Roine, R.P. The association of financial difficulties and out-of-pocket payments with health-related quality of life among breast, prostate and colorectal cancer patients. *Acta Oncol.* **2019**, *58*, 1062–1068, doi:10.1080/0284186X.2019.1592218.
20. Lu, L.; O'Sullivan, E.; Sharp, L. Cancer-related financial hardship among head and neck cancer survivors: Risk factors and associations with health-related quality of life. *Psychooncology* **2019**, *28*, 863–871, doi:10.1002/pon.5034.
21. Mandaliya, H.; Ansari, Z.; Evans, T.; Oldmeadow, C.; George, M. Psychosocial Analysis of Cancer Survivors in Rural Australia: Focus on Demographics, Quality of Life and Financial Domains. *Asian Pac. J. Cancer Prev.* **2016**, *17*, 2459–2464.
22. McLean, L.; Hong, W.; McLachlan, S.-A. Financial toxicity in patients with cancer attending a public Australian tertiary hospital: A pilot study. *Asia Pac. J. Clin. Oncol.* **2020**, doi:10.1111/ajco.13448.
23. McNeil, R.J.; McCarthy, M.; Dunt, D.; Thompson, K.; Kosola, S.; Orme, L.; Drew, S.; Sawyer, S. Financial Challenges of Cancer for Adolescents and Young Adults and Their Parent Caregivers. *Social Work Research* **2019**, *43*, 17–30, doi:10.1093/swr/svy027.
24. Mehrlis, K.; Witte, J.; Surmann, B.; Kudlich, M.; Apostolidis, L.; Walther, J.; Jäger, D.; Greiner, W.; Winkler, E.C. The patient-level effect of the cost of Cancer care - financial burden in German Cancer patients. *BMC Cancer* **2020**, *20*, 529, doi:10.1186/s12885-020-07028-4.
25. Mercadante, S.; Aielli, F.; Adile, C.; Bonanno, G.; Casuccio, A. Financial distress and its impact on symptom expression in advanced cancer patients. *Support. Care Cancer* **2021**, *29*, 485–490, doi:10.1007/s00520-020-05507-9.

26. Paul, C.L.; Hall, A.E.; Carey, M.L.; Cameron, E.C.; Clinton-McHarg, T. Access to care and impacts of cancer on daily life: do they differ for metropolitan versus regional hematological cancer survivors? *J. Rural Health* **2013**, *29*, Suppl 1, s43–50, doi:10.1111/jrh.12020.
27. Pearce, A.; Tomalin, B.; Kaambwa, B.; Horevoorts, N.; Duijts, S.; Mols, F.; van de Poll-Franse, L.; Koczwara, B. Financial toxicity is more than costs of care: the relationship between employment and financial toxicity in long-term cancer survivors. *J. Cancer Surviv.* **2019**, *13*, 10–20, doi:10.1007/s11764-018-0723-7.
28. Schmidt, M.E.; Scherer, S.; Wiskemann, J.; Steindorf, K. Return to work after breast cancer: The role of treatment-related side effects and potential impact on quality of life. *Eur. J. Cancer Care (Engl)* **2019**, *28*, e13051, doi:10.1111/ecc.13051.
29. Sharp, L.; Timmons, A. Pre-diagnosis employment status and financial circumstances predict cancer-related financial stress and strain among breast and prostate cancer survivors. *Support. Care Cancer* **2016**, *24*, 699–709, doi:10.1007/s00520-015-2832-4.
30. Zucca, A.; Boyes, A.; Newling, G.; Hall, A.; Girgis, A. Travelling all over the countryside: travel-related burden and financial difficulties reported by cancer patients in New South Wales and Victoria. *Aust. J. Rural Health* **2011**, *19*, 298–305, doi:10.1111/j.1440-1584.2011.01232.x.
31. Amir, Z.; Wilson, K.; Hennings, J.; Young, A. The meaning of cancer: implications for family finances and consequent impact on lifestyle, activities, roles and relationships. *Psychooncology*. **2012**, *21*, 1167–1174, doi:10.1002/pon.2021.
32. Bennett, J.A.; Brown, P.; Cameron, L.; Whitehead, L.C.; Porter, D.; McPherson, K.M. Changes in employment and household income during the 24 months following a cancer diagnosis. *Support. Care Cancer* **2009**, *17*, 1057–1064, doi:10.1007/s00520-008-0540-z.
33. Fitch, M.; Longo, C.J. Exploring the impact of out-of-pocket costs on the quality of life of Canadian cancer patients. *J. Psychosoc. Oncol.* **2018**, *36*, 582–596, doi:10.1080/07347332.2018.1486937.
34. Fitch, M.I.; Longo, C.J.; Chan, R.J. Cancer patients' perspectives on financial burden in a universal healthcare system: Analysis of qualitative data from participants from 20 provincial cancer centers in Canada. *Patient Educ. Couns.* **2021**, *104*, 903–910, doi:10.1016/j.pec.2020.08.013.
35. Gray, R.E.; James, P.; Manthorne, J.; Gould, J.; Fitch, M.I. A consultation with Canadian rural women with breast cancer. *Health Expect.* **2004**, *7*, 40–50, doi:10.1046/j.1369-6513.2003.00248.x.
36. Grinyer, A. The biographical impact of teenage and adolescent cancer. *Chronic Illn.* **2007**, *3*, 265–277, doi:10.1177/1742395307085335.
37. Kane, D.; Rajacich, D.; Andary, C. Experiences of cancer patients' return to work. *Can. Oncol. Nurs. J.* **2020**, *30*, 113–118, doi:10.5737/23688076302113118.
38. McGrath, P.; Patterson, C.; Yates, P.; Treloar, S.; Oldenburg, B.; Loos, C. A study of postdiagnosis breast cancer concerns for women living in rural and remote Queensland. Part II: Support issues. *Aust. J. Rural Health* **1999**, *7*, 43–52, doi:10.1046/j.1440-1584.1999.00216.x.
39. McGrath, P. "It's horrendous—but really, what can you do?" Preliminary findings on financial impact of relocation for specialist treatment. *Aust. Health Rev.* **2000**, *23*, 94–103, doi:10.1071/ah000094.
40. Moffatt, S.; Noble, E.; Exley, C. "Done more for me in a fortnight than anybody done in all me life." How welfare rights advice can help people with cancer. *BMC Health Serv. Res.* **2010**, *10*, 259, doi:10.1186/1472-6963-10-259.
41. Moffatt, S.; Noble, E.; White, M. Addressing the financial consequences of cancer: qualitative evaluation of a welfare rights advice service. *PLoS One* **2012**, *7*, e42979, doi:10.1371/journal.pone.0042979.
42. Moffatt, S.; Noble, E. Work or welfare after cancer? Explorations of identity and stigma. *Sociol. Health Illn.* **2015**, *37*, 1191–1205, doi:10.1111/1467-9566.12303.
43. Schröder, S.L.; Schumann, N.; Fink, A.; Richter, M. Coping mechanisms for financial toxicity: a qualitative study of cancer patients' experiences in Germany. *Support. Care Cancer* **2020**, *28*, 1131–1139, doi:10.1007/s00520-019-04915-w.
44. Slavova-Azmanova, N.S.; Newton, J.C.; Saunders, C.; Johnson, C.E. 'Biggest factors in having cancer were costs and no entitlement to compensation'-The determinants of out-of-pocket costs for cancer care through the lenses of rural and outer metropolitan Western Australians. *Aust. J. Rural Health* **2020**, *28*, 588–602, doi:10.1111/ajr.12686.
45. Timmons, A.; Gooberman-Hill, R.; Sharp, L. "It's at a time in your life when you are most vulnerable": a qualitative exploration of the financial impact of a cancer diagnosis and implications for financial protection in health. *PLoS One* **2013**, *8*, e77549, doi:10.1371/journal.pone.0077549.
46. Timmons, A.; Gooberman-Hill, R.; Sharp, L. The multidimensional nature of the financial and economic burden of a cancer diagnosis on patients and their families: qualitative findings from a country with a mixed public-private healthcare system. *Support. Care Cancer* **2013**, *21*, 107–117, doi:10.1007/s00520-012-1498-4.

### Supplementary material 3: Healthcare expenditure by type of financing

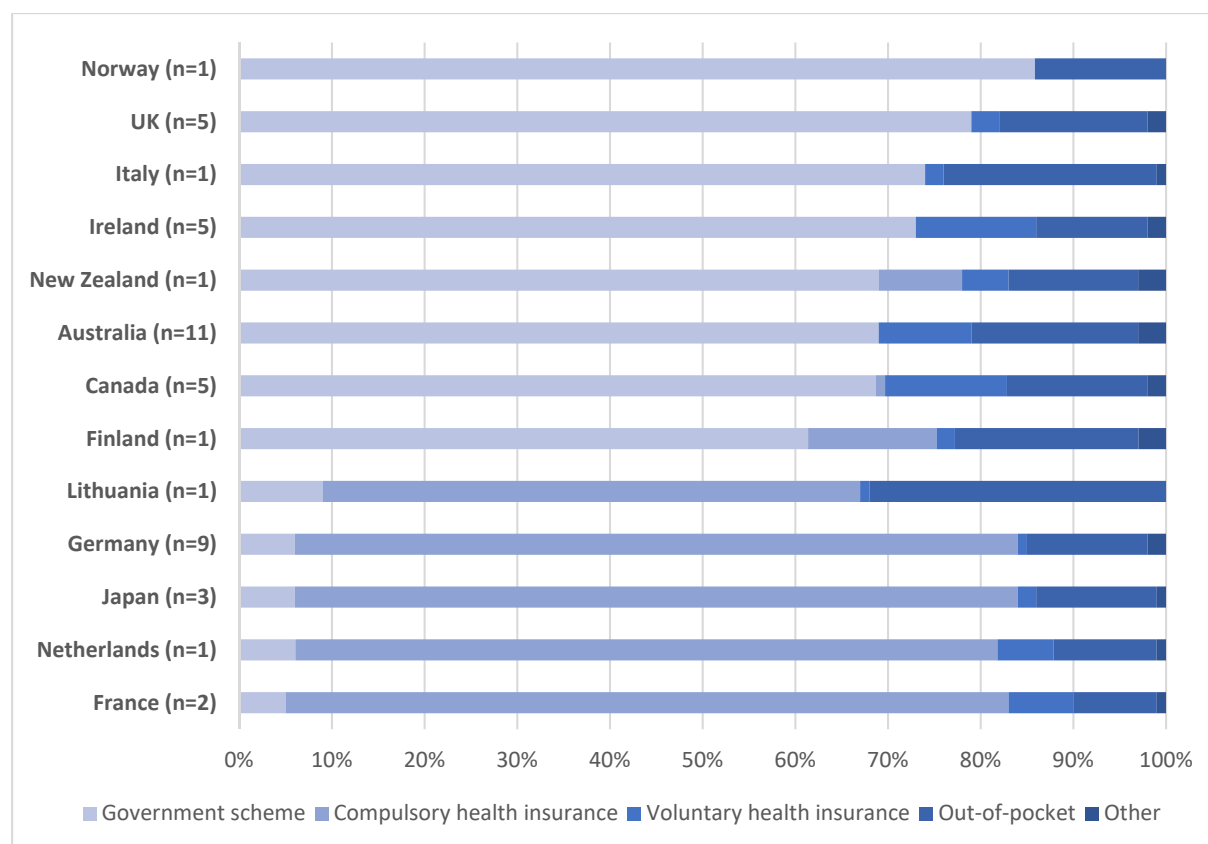

**Figure S3:** Health expenditure by type of financing; data based on OECD data from 2017 (or nearest year available) [47]

#### References

1. OECD. *Health at a Glance 2019*; OECD, 2019, ISBN 9789264382084.



## Supplementary material 4: Quality appraisal

Quality appraisal of quantitative studies based on NIH Quality Assessment Tool for Observational Cohort and Cross-Sectional Studies [48]

**Table S4.1:** Quality appraisal of quantitative studies

| Study                      | Was the research question or objective in this paper clearly stated? | Was the study population clearly specified and defined? | Was the participation rate of eligible persons at least 50%? | Were all the subjects selected or recruited from the same or similar populations (including the same time period)? Were inclusion and exclusion criteria for being in the study prespecified and applied uniformly to all participants? | Was a sample size justification, or variance and effect estimates provided? | For the analyses in this paper, were the exposure(s) of interest measured prior to the outcome(s) being measured? | Was the timeframe sufficient so that one could reasonably expect to see an association between exposure and outcome if it existed? | For exposures that can vary in amount or level, did the study examine different levels of the exposure as related to the outcome (e.g., categories of exposure, or exposure measured as continuous variable)? | Were the exposure measures (independent variables) clearly defined, valid, reliable, and implemented consistently across all study participants? | Was the exposure(s) assessed more than once over time? | Were the outcome measures (dependent variables) clearly defined, valid, reliable, and implemented consistently across all study participants? | Were the outcome assessors blinded to the exposure status of participants? | Was loss to follow-up after baseline 20% or less? | Were key potential confounding variables measured and adjusted statistically for their impact on the relationship between exposure(s) and outcome(s)? | Quality rating (good, fair or poor) |
|----------------------------|----------------------------------------------------------------------|---------------------------------------------------------|--------------------------------------------------------------|-----------------------------------------------------------------------------------------------------------------------------------------------------------------------------------------------------------------------------------------|-----------------------------------------------------------------------------|-------------------------------------------------------------------------------------------------------------------|------------------------------------------------------------------------------------------------------------------------------------|---------------------------------------------------------------------------------------------------------------------------------------------------------------------------------------------------------------|--------------------------------------------------------------------------------------------------------------------------------------------------|--------------------------------------------------------|-----------------------------------------------------------------------------------------------------------------------------------------------|----------------------------------------------------------------------------|---------------------------------------------------|-------------------------------------------------------------------------------------------------------------------------------------------------------|-------------------------------------|
| Akechi et al. (2012)[1]    | Yes                                                                  | Yes                                                     | Yes                                                          | No                                                                                                                                                                                                                                      | No                                                                          | No                                                                                                                | No                                                                                                                                 | Yes                                                                                                                                                                                                           | Yes                                                                                                                                              | NA                                                     | Yes                                                                                                                                           | NA                                                                         | NA                                                | Yes                                                                                                                                                   | Fair                                |
| Arndt et al. (2004)        | Yes                                                                  | Yes                                                     | Yes                                                          | Yes                                                                                                                                                                                                                                     | No                                                                          | No                                                                                                                | No                                                                                                                                 | Yes                                                                                                                                                                                                           | Yes                                                                                                                                              | NA                                                     | Yes                                                                                                                                           | NA                                                                         | NA                                                | Yes                                                                                                                                                   | Fair                                |
| Arndt et al. (2017)[3]     | Yes                                                                  | Yes                                                     | No                                                           | No                                                                                                                                                                                                                                      | No                                                                          | No                                                                                                                | No                                                                                                                                 | Yes                                                                                                                                                                                                           | Yes                                                                                                                                              | NA                                                     | Yes                                                                                                                                           | NA                                                                         | NA                                                | Yes                                                                                                                                                   | Fair                                |
| Arndt et al. (2019)[4]     | Yes                                                                  | Yes                                                     | No                                                           | No                                                                                                                                                                                                                                      | No                                                                          | No                                                                                                                | No                                                                                                                                 | Yes                                                                                                                                                                                                           | Yes                                                                                                                                              | NA                                                     | Yes                                                                                                                                           | NA                                                                         | NA                                                | Yes                                                                                                                                                   | Fair                                |
| Barbarete et al. (2017)[5] | Yes                                                                  | Yes                                                     | NR                                                           | Yes                                                                                                                                                                                                                                     | No                                                                          | No                                                                                                                | No                                                                                                                                 | Yes                                                                                                                                                                                                           | No                                                                                                                                               | NA                                                     | No                                                                                                                                            | NA                                                                         | NA                                                | No                                                                                                                                                    | Poor                                |
| Barbarete et al. (2019)[6] | Yes                                                                  | Yes                                                     | NR                                                           | Yes                                                                                                                                                                                                                                     | No                                                                          | No                                                                                                                | No                                                                                                                                 | Yes                                                                                                                                                                                                           | No                                                                                                                                               | NA                                                     | No                                                                                                                                            | NA                                                                         | NA                                                | Yes                                                                                                                                                   | Fair                                |

|                                |     |     |     |     |     |     |     |     |     |     |     |    |     |     |      |
|--------------------------------|-----|-----|-----|-----|-----|-----|-----|-----|-----|-----|-----|----|-----|-----|------|
| Büttner et al. (2019)[7]       | Yes | Yes | NR  | Yes | No  | Yes | Yes | Yes | Yes | Yes | Yes | NA | No  | No  | Fair |
| Doege et al. (2019)[8]         | Yes | Yes | No  | No  | No  | No  | No  | Yes | Yes | NA  | Yes | NA | NA  | Yes | Fair |
| Egestad and Nieder (2015)[9]   | Yes | Yes | NR  | Yes | No  | Yes | Yes | Yes | Yes | Yes | Yes | NA | Yes | No  | Fair |
| Ezeife et al. (2018)[10]       | Yes | No  | Yes | Yes | No  | No  | No  | Yes | Yes | NA  | Yes | NA | NA  | Yes | Fair |
| Gordon et al. (2017a)[11]      | Yes | Yes | NR  | Yes | Yes | No  | No  | Yes | Yes | NA  | No  | NA | NA  | No  | Fair |
| Gordon et al. (2017b)[12]      | Yes | Yes | No  | Yes | No  | Yes | Yes | Yes | Yes | Yes | Yes | NA | Yes | Yes | Fair |
| Gordon et al. (2020)[13]       | Yes | Yes | No  | Yes | No  | No  | No  | Yes | Yes | NA  | Yes | NA | NA  | No  | Fair |
| Hanly et al. (2018)[14]        | Yes | Yes | No  | Yes | No  | No  | No  | Yes | Yes | NA  | No  | NA | NA  | Yes | Fair |
| Honda et al. (2019)[15]        | Yes | Yes | Yes | Yes | No  | No  | No  | Yes | Yes | NA  | Yes | NA | NA  | Yes | Fair |
| Ivanauskienė et al. (2014)[16] | Yes | Yes | Yes | Yes | Yes | No  | No  | Yes | Yes | NA  | Yes | NA | NA  | Yes | Good |
| Kaptein et al. (2013)[17]      | Yes | Yes | NR  | Yes | No  | Yes | No  | Yes | Yes | Yes | Yes | NA | NR  | Yes | Fair |
| Koch et al. (2013)[18]         | Yes | Yes | Yes | Yes | No  | Yes | Yes | Yes | Yes | Yes | Yes | NA | No  | Yes | Fair |
| Koskinen et al. (2019)[19]     | Yes | Yes | NR  | Yes | No  | No  | No  | Yes | Yes | NA  | Yes | NA | NA  | Yes | Fair |
| Lu et al. (2019)[20]           | Yes | Yes | Yes | Yes | No  | No  | No  | Yes | Yes | NA  | No  | NA | NA  | Yes | Fair |
| Mandaliya et al. (2016)[21]    | Yes | Yes | NR  | Yes | No  | No  | No  | Yes | Yes | NA  | Yes | NA | NA  | Yes | Fair |
| McLean et al. (2020)[22]       | Yes | Yes | Yes | Yes | No  | No  | No  | Yes | Yes | NA  | Yes | NA | NA  | Yes | Fair |
| McNeil et al. (2019)[23]       | Yes | Yes | No  | Yes | No  | No  | No  | Yes | Yes | NA  | No  | NA | NA  | Yes | Fair |
| Mehlis et al. (2020)[24]       | Yes | Yes | Yes | Yes | No  | No  | No  | Yes | Yes | NA  | No  | NA | NA  | Yes | Fair |
| Mercadante et al. (2020)[25]   | Yes | Yes | NR  | Yes | No  | No  | No  | Yes | Yes | NA  | No  | NA | NA  | Yes | Fair |
| Paul et al. (2013)[26]         | Yes | Yes | No  | Yes | No  | No  | No  | Yes | Yes | NA  | No  | NA | NA  | No  | Fair |
| Pearce et al. (2019)[27]       | Yes | Yes | NR  | Yes | No  | No  | No  | Yes | Yes | NA  | Yes | NA | NA  | Yes | Fair |
| Schmidt et al. (2019)[28]      | Yes | Yes | NR  | No  | No  | Yes | Yes | Yes | Yes | Yes | Yes | NA | NR  | Yes | Fair |

|                              |     |     |     |     |    |     |     |     |     |     |     |    |    |     |      |
|------------------------------|-----|-----|-----|-----|----|-----|-----|-----|-----|-----|-----|----|----|-----|------|
| Sharp and Timmons (2016)[29] | Yes | Yes | Yes | Yes | No | No  | No  | Yes | Yes | NA  | No  | NA | NA | Yes | Fair |
| Zucca et al. (2011)[30]      | Yes | Yes | Yes | Yes | No | Yes | Yes | Yes | Yes | Yes | Yes | NA | NR | Yes | Fair |

*Qualitative appraisal of qualitative studies based on CASP Checklist [49]*

**Table S4.2:** Quality appraisal of qualitative studies

| Study                         | Was there a clear statement of the aims of the research?? | Is a qualitative methodology appropriate? | Was the research design appropriate to address the aims of the research? | Was the recruitment strategy appropriate to the aims of the research? | Was the data collected in a way that addressed the research issue? | Has the relationship between researcher and participants been adequately considered? | Have ethical issues been taken into consideration? | Was the data analysis sufficiently rigorous? | Is there a clear statement of findings? | How valuable is the research? |
|-------------------------------|-----------------------------------------------------------|-------------------------------------------|--------------------------------------------------------------------------|-----------------------------------------------------------------------|--------------------------------------------------------------------|--------------------------------------------------------------------------------------|----------------------------------------------------|----------------------------------------------|-----------------------------------------|-------------------------------|
| Amir et al. (2012)[31]        | Yes                                                       | Yes                                       | Yes                                                                      | Yes                                                                   | Yes                                                                | No                                                                                   | Yes                                                | Yes                                          | Yes                                     | Yes                           |
| Bennett et al. (2009)[32]     | Yes                                                       | Yes                                       | Yes                                                                      | Yes                                                                   | Yes                                                                | No                                                                                   | Yes                                                | No                                           | Yes                                     | Yes                           |
| Fitch and Longo (2018) [33]   | Yes                                                       | Yes                                       | Yes                                                                      | Yes                                                                   | Yes                                                                | No                                                                                   | Yes                                                | Yes                                          | Yes                                     | Yes                           |
| Fitch et al. (2020) [34]      | Yes                                                       | Yes                                       | Yes                                                                      | NA                                                                    | Yes                                                                | NA                                                                                   | No                                                 | Yes                                          | Yes                                     | Yes                           |
| Gray et al. (2004) [35]       | Yes                                                       | Yes                                       | Yes                                                                      | Yes                                                                   | Yes                                                                | No                                                                                   | No                                                 | Yes                                          | Yes                                     | Yes                           |
| Grinyer (2007) [36]           | Yes                                                       | Yes                                       | Yes                                                                      | Yes                                                                   | Yes                                                                | No                                                                                   | Yes                                                | Yes                                          | Yes                                     | Yes                           |
| Kane et al. (2020) [37]       | Yes                                                       | Yes                                       | Yes                                                                      | Yes                                                                   | Yes                                                                | No                                                                                   | Yes                                                | Yes                                          | Yes                                     | Yes                           |
| McGrath (1999) [38]           | Yes                                                       | Yes                                       | Yes                                                                      | Yes                                                                   | Yes                                                                | No                                                                                   | No                                                 | No                                           | Yes                                     | No                            |
| McGrath (2000) [39]           | Yes                                                       | Yes                                       | Yes                                                                      | Yes                                                                   | Yes                                                                | No                                                                                   | Yes                                                | No                                           | Yes                                     | No                            |
| Moffatt et al. (2010) [40]    | Yes                                                       | Yes                                       | Yes                                                                      | Yes                                                                   | Yes                                                                | No                                                                                   | Yes                                                | No                                           | Yes                                     | Yes                           |
| Moffatt et al. (2012) [41]    | Yes                                                       | Yes                                       | Yes                                                                      | Yes                                                                   | Yes                                                                | No                                                                                   | Yes                                                | No                                           | Yes                                     | Yes                           |
| Moffatt and Noble (2015) [42] | Yes                                                       | Yes                                       | Yes                                                                      | Yes                                                                   | Yes                                                                | No                                                                                   | Yes                                                | No                                           | Yes                                     | Yes                           |
| Schröder et al. (2020) [43]   | Yes                                                       | Yes                                       | Yes                                                                      | Yes                                                                   | Yes                                                                | No                                                                                   | Yes                                                | Yes                                          | Yes                                     | Yes                           |

|                                     |     |     |     |     |     |    |     |     |     |     |
|-------------------------------------|-----|-----|-----|-----|-----|----|-----|-----|-----|-----|
| Slavova-Azmanova et al. (2020) [44] | Yes | Yes | Yes | NA  | Yes | NA | Yes | Yes | Yes | Yes |
| Timmons et al. (2013a) [45]         | Yes | Yes | Yes | Yes | Yes | No | Yes | Yes | Yes | Yes |
| Timmons et al. (2013b) [46]         | Yes | Yes | Yes | Yes | Yes | No | Yes | Yes | Yes | Yes |

## References

- National Institutes of Health; National Heart, Lung, and Blood Institute. Study quality assessment tools. Available online: <https://www.nhlbi.nih.gov/health-topics/study-quality-assessment-tools> (accessed on 28 April 2021).
- Akechi, T.; Okuyama, T.; Uchida, M.; Nakaguchi, T.; Ito, Y.; Yamashita, H.; Toyama, T.; Komatsu, H.; Kizawa, Y.; Wada, M. Perceived needs, psychological distress and quality of life of elderly cancer patients. *Jpn. J. Clin. Oncol.* 2012, 42, 704–710, doi:10.1093/jjco/hys075.
- Arndt, V.; Merx, H.; Stegmaier, C.; Ziegler, H.; Brenner, H. Quality of life in patients with colorectal cancer 1 year after diagnosis compared with the general population: a population-based study. *J. Clin. Oncol.* 2004, 22, 4829–4836, doi:10.1200/JCO.2004.02.018.
- Arndt, V.; Koch-Gallenkamp, L.; Jansen, L.; Bertram, H.; Eberle, A.; Holleczeck, B.; Schmid-Höpfner, S.; Waldmann, A.; Zeissig, S.R.; Brenner, H. Quality of life in long-term and very long-term cancer survivors versus population controls in Germany. *Acta Oncol.* 2017, 56, 190–197, doi:10.1080/0284186X.2016.1266089.
- Arndt, V.; Koch-Gallenkamp, L.; Bertram, H.; Eberle, A.; Holleczeck, B.; Pritzkeleit, R.; Waldeyer-Sauerland, M.; Waldmann, A.; Zeissig, S.R.; Doege, D.; et al. Return to work after cancer. A multi-regional population-based study from Germany. *Acta Oncol.* 2019, 58, 811–818, doi:10.1080/0284186X.2018.1557341.
- Barbarett, C.; Brosse, C.; Rhondali, W.; Ruer, M.; Monsarrat, L.; Michaud, P.; Schott, A.M.; Delgado-Guay, M.; Bruera, E.; Sanchez, S.; et al. Financial distress in patients with advanced cancer. *PLoS One* 2017, 12, e0176470, doi:10.1371/journal.pone.0176470.
- Barbarett, C.; Delgado-Guay, M.O.; Sanchez, S.; Brosse, C.; Ruer, M.; Rhondali, W.; Monsarrat, L.; Michaud, P.; Schott, A.M.; Bruera, E.; et al. Inequalities in Financial Distress, Symptoms, and Quality of Life Among Patients with Advanced Cancer in France and the U.S. *Oncologist* 2019, 24, 1121–1127, doi:10.1634/theoncologist.2018-0353.
- Büttner, M.; König, H.-H.; Löbner, M.; Briest, S.; Konnopka, A.; Dietz, A.; Riedel-Heller, S.; Singer, S. Out-of-pocket-payments and the financial burden of 502 cancer patients of working age in Germany: results from a longitudinal study. *Support. Care Cancer* 2019, 27, 2221–2228, doi:10.1007/s00520-018-4498-1.
- Doege, D.; Thong, M.S.-Y.; Koch-Gallenkamp, L.; Bertram, H.; Eberle, A.; Holleczeck, B.; Pritzkeleit, R.; Waldeyer-Sauerland, M.; Waldmann, A.; Zeissig, S.R.; et al. Health-related quality of life in long-term disease-free breast cancer survivors versus female population controls in Germany. *Breast Cancer Res. Treat.* 2019, 175, 499–510, doi:10.1007/s10549-019-05188-x.
- Egestad, H.; Nieder, C. Undesirable financial effects of head and neck cancer radiotherapy during the initial treatment period. *Int. J. Circumpolar Health* 2015, 74, 26686, doi:10.3402/ijch.v74.26686.
- Ezeife, D.A.; Morganstein, B.J.; Lau, S.; Law, J.H.; Le, L.W.; Bredle, J.; Cella, D.; Doherty, M.K.; Bradbury, P.; Liu, G.; et al. Financial Burden Among Patients With Lung Cancer in a Publically Funded Health Care System. *Clin. Lung Cancer* 2019, 20, 231–236, doi:10.1016/j.clc.2018.12.010.
- Gordon, L.G.; Walker, S.M.; Mervin, M.C.; Lowe, A.; Smith, D.P.; Gardiner, R.A.; Chambers, S.K. Financial toxicity: a potential side effect of prostate cancer treatment among Australian men. *Eur. J. Cancer Care (Engl)* 2017, 26, doi:10.1111/ecc.12392.
- Gordon, L.G.; Beesley, V.L.; Mihala, G.; Koczwara, B.; Lynch, B.M. Reduced employment and financial hardship among middle-aged individuals with colorectal cancer. *Eur. J. Cancer Care (Engl)* 2017, 26, doi:10.1111/ecc.12744.
- Gordon, L.G.; Elliott, T.M.; Wakelin, K.; Leyden, S.; Leyden, J.; Michael, M.; Pavlakis, N.; Mumford, J.; Segelov, E.; Wyld, D.K. The Economic Impact on Australian Patients with Neuroendocrine Tumours. *Patient* 2020, 13, 363–373, doi:10.1007/s40271-020-00412-z.
- Hanly, P.; Maguire, R.; Ceilleachair, A.O.; Sharp, L. Financial hardship associated with colorectal cancer survivorship: The role of asset depletion and debt accumulation. *Psychooncology*. 2018, 27, 2165–2171, doi:10.1002/pon.4786.
- Honda, K.; Gyawali, B.; Ando, M.; Kumanishi, R.; Kato, K.; Sugiyama, K.; Mitani, S.; Masuishi, T.; Narita, Y.; Bando, H.; et al. Prospective Survey of Financial Toxicity Measured by the Comprehensive Score for Financial Toxicity in Japanese Patients With Cancer. *J. Glob. Oncol.* 2019, 5, 1–8, doi:10.1200/JGO.19.00003.
- Ivanauskienė, R.; Padaiga, Ž.; Šimoliūnienė, R.; Smalytė, G.; Domeikienė, A. Well-being of newly diagnosed women with breast cancer: which factors matter more? *Support. Care Cancer* 2014, 22, 519–526, doi:10.1007/s00520-013-2005-2.
- Kaptein, A.A.; Yamaoka, K.; Snoei, L.; van der Kloot, W.A.; Inoue, K.; Tabei, T.; Kroep, J.R.; Krol-Warmerdam, E.; Ranke, G.; Meirink, C.; et al. Illness perceptions and quality of life in Japanese and Dutch women with breast cancer. *J. Psychosoc. Oncol.* 2013, 31, 83–102, doi:10.1080/07347332.2012.741092.
- Koch, L.; Jansen, L.; Herrmann, A.; Stegmaier, C.; Holleczeck, B.; Singer, S.; Brenner, H.; Arndt, V. Quality of life in long-term breast cancer survivors - a 10-year longitudinal population-based study. *Acta Oncol.* 2013, 52, 1119–1128, doi:10.3109/0284186X.2013.774461.
- Koskinen, J.-P.; Färkkilä, N.; Sintonen, H.; Saarto, T.; Taari, K.; Roine, R.P. The association of financial difficulties and out-of-pocket payments with health-related quality of life among breast, prostate and colorectal cancer patients. *Acta Oncol.* 2019, 58, 1062–1068, doi:10.1080/0284186X.2019.1592218.

21. Lu, L.; O'Sullivan, E.; Sharp, L. Cancer-related financial hardship among head and neck cancer survivors: Risk factors and associations with health-related quality of life. *Psychooncology*. 2019, 28, 863–871, doi:10.1002/pon.5034.
22. Mandalayi, H.; Ansari, Z.; Evans, T.; Oldmeadow, C.; George, M. Psychosocial Analysis of Cancer Survivors in Rural Australia: Focus on Demographics, Quality of Life and Financial Domains. *Asian Pac. J. Cancer Prev.* 2016, 17, 2459–2464.
23. McLean, L.; Hong, W.; McLachlan, S.-A. Financial toxicity in patients with cancer attending a public Australian tertiary hospital: A pilot study. *Asia Pac. J. Clin. Oncol.* 2020, doi:10.1111/ajco.13448.
24. McNeil, R.J.; McCarthy, M.; Dunt, D.; Thompson, K.; Kosola, S.; Orme, L.; Drew, S.; Sawyer, S. Financial Challenges of Cancer for Adolescents and Young Adults and Their Parent Caregivers. *Social Work Research* 2019, 43, 17–30, doi:10.1093/swr/svy027.
25. Mehlis, K.; Witte, J.; Surmann, B.; Kudlich, M.; Apostolidis, L.; Walther, J.; Jäger, D.; Greiner, W.; Winkler, E.C. The patient-level effect of the cost of Cancer care - financial burden in German Cancer patients. *BMC Cancer* 2020, 20, 529, doi:10.1186/s12885-020-07028-4.
26. Mercadante, S.; Aielli, F.; Adile, C.; Bonanno, G.; Casuccio, A. Financial distress and its impact on symptom expression in advanced cancer patients. *Support. Care Cancer* 2021, 29, 485–490, doi:10.1007/s00520-020-05507-9.
27. Paul, C.L.; Hall, A.E.; Carey, M.L.; Cameron, E.C.; Clinton-McHarg, T. Access to care and impacts of cancer on daily life: do they differ for metropolitan versus regional hematological cancer survivors? *J. Rural Health* 2013, 29 Suppl 1, s43-50, doi:10.1111/jrh.12020.
28. Pearce, A.; Tomalin, B.; Kaambwa, B.; Horevoorts, N.; Duijts, S.; Mols, F.; van de Poll-Franse, L.; Koczwara, B. Financial toxicity is more than costs of care: the relationship between employment and financial toxicity in long-term cancer survivors. *J. Cancer Surviv.* 2019, 13, 10–20, doi:10.1007/s11764-018-0723-7.
29. Schmidt, M.E.; Scherer, S.; Wiskemann, J.; Steindorf, K. Return to work after breast cancer: The role of treatment-related side effects and potential impact on quality of life. *Eur. J. Cancer Care (Engl)* 2019, 28, e13051, doi:10.1111/ecc.13051.
30. Sharp, L.; Timmons, A. Pre-diagnosis employment status and financial circumstances predict cancer-related financial stress and strain among breast and prostate cancer survivors. *Support. Care Cancer* 2016, 24, 699–709, doi:10.1007/s00520-015-2832-4.
31. Zucca, A.; Boyes, A.; Newling, G.; Hall, A.; Girgis, A. Travelling all over the countryside: travel-related burden and financial difficulties reported by cancer patients in New South Wales and Victoria. *Aust. J. Rural Health* 2011, 19, 298–305, doi:10.1111/j.1440-1584.2011.01232.x.
32. Critical Appraisal Skills Programme. CASP-Qualitative-Checklist 2018.
33. Amir, Z.; Wilson, K.; Hennings, J.; Young, A. The meaning of cancer: implications for family finances and consequent impact on lifestyle, activities, roles and relationships. *Psychooncology*. 2012, 21, 1167–1174, doi:10.1002/pon.2021.
34. Bennett, J.A.; Brown, P.; Cameron, L.; Whitehead, L.C.; Porter, D.; McPherson, K.M. Changes in employment and household income during the 24 months following a cancer diagnosis. *Support. Care Cancer* 2009, 17, 1057–1064, doi:10.1007/s00520-008-0540-z.
35. Fitch, M.; Longo, C.J. Exploring the impact of out-of-pocket costs on the quality of life of Canadian cancer patients. *J. Psychosoc. Oncol.* 2018, 36, 582–596, doi:10.1080/07347332.2018.1486937.
36. Fitch, M.I.; Longo, C.J.; Chan, R.J. Cancer patients' perspectives on financial burden in a universal healthcare system: Analysis of qualitative data from participants from 20 provincial cancer centers in Canada. *Patient Educ. Couns.* 2021, 104, 903–910, doi:10.1016/j.pec.2020.08.013.
37. Gray, R.E.; James, P.; Manthorne, J.; Gould, J.; Fitch, M.I. A consultation with Canadian rural women with breast cancer. *Health Expect.* 2004, 7, 40–50, doi:10.1046/j.1369-6513.2003.00248.x.
38. Grinyer, A. The biographical impact of teenage and adolescent cancer. *Chronic Illn.* 2007, 3, 265–277, doi:10.1177/1742395307085335.
39. Kane, D.; Rajacich, D.; Andary, C. Experiences of cancer patients' return to work. *Can. Oncol. Nurs. J.* 2020, 30, 113–118, doi:10.5737/23688076302113118.
40. McGrath, P.; Patterson, C.; Yates, P.; Treloar, S.; Oldenburg, B.; Loos, C. A study of postdiagnosis breast cancer concerns for women living in rural and remote Queensland. Part II: Support issues. *Aust. J. Rural Health* 1999, 7, 43–52, doi:10.1046/j.1440-1584.1999.00216.x.
41. McGrath, P. "It's horrendous—but really, what can you do?" Preliminary findings on financial impact of relocation for specialist treatment. *Aust. Health Rev.* 2000, 23, 94–103, doi:10.1071/ah000094.
42. Moffatt, S.; Noble, E.; Exley, C. "Done more for me in a fortnight than anybody done in all me life." How welfare rights advice can help people with cancer. *BMC Health Serv. Res.* 2010, 10, 259, doi:10.1186/1472-6963-10-259.
43. Moffatt, S.; Noble, E.; White, M. Addressing the financial consequences of cancer: qualitative evaluation of a welfare rights advice service. *PLoS One* 2012, 7, e42979, doi:10.1371/journal.pone.0042979.
44. Moffatt, S.; Noble, E. Work or welfare after cancer? Explorations of identity and stigma. *Sociol. Health Illn.* 2015, 37, 1191–1205, doi:10.1111/1467-9566.12303.
45. Schröder, S.L.; Schumann, N.; Fink, A.; Richter, M. Coping mechanisms for financial toxicity: a qualitative study of cancer patients' experiences in Germany. *Support. Care Cancer* 2020, 28, 1131–1139, doi:10.1007/s00520-019-04915-w.
46. Slavova-Azmanova, N.S.; Newton, J.C.; Saunders, C.; Johnson, C.E. 'Biggest factors in having cancer were costs and no entitlement to compensation'-The determinants of out-of-pocket costs for cancer care through the lenses of rural and outer metropolitan Western Australians. *Aust. J. Rural Health* 2020, 28, 588–602, doi:10.1111/ajr.12686.
47. Timmons, A.; Gooberman-Hill, R.; Sharp, L. "It's at a time in your life when you are most vulnerable": a qualitative exploration of the financial impact of a cancer diagnosis and implications for financial protection in health. *PLoS One* 2013, 8, e77549, doi:10.1371/journal.pone.0077549.
48. Timmons, A.; Gooberman-Hill, R.; Sharp, L. The multidimensional nature of the financial and economic burden of a cancer diagnosis on patients and their families: qualitative findings from a country with a mixed public-private healthcare system. *Support. Care Cancer* 2013, 21, 107–117, doi:10.1007/s00520-012-1498-4.

## Supplementary material 5: Summary of identified risk factors

**Table S5:** Summary of identified risk factors

| Study                       | Instrument, validation, domains considered | Definition of dependent variable                                                       | Method       | Category of risk factors<br>Subcategory                      | Risk factor as stated in the article                      | Significance    | Effect | Occurrence |
|-----------------------------|--------------------------------------------|----------------------------------------------------------------------------------------|--------------|--------------------------------------------------------------|-----------------------------------------------------------|-----------------|--------|------------|
| <i>Quantitative Studies</i> |                                            |                                                                                        |              |                                                              |                                                           |                 |        |            |
| Akechi et al. (2012) [1]    | EORTC QLQ-C30<br>Validated<br>Material     | Physical condition or medical treatment caused financial difficulties in the past week | ANCOVA       | Socio-demographic factors<br>Age                             | Age >70 years (ref: <70 years)                            | Significant     | -      | Before     |
| Arndt et al. (2004) [4]     | EORTC-QLQ-C30<br>Validated<br>Material     | Physical condition or medical treatment caused financial difficulties in the past week | Not reported | Socio-demographic factors<br>Age                             | Age <60                                                   | Not reported    | +      | Before     |
| Arndt et al. (2017) [3]     | EORTC QLQ-C30<br>Validated<br>Material     | Physical condition or medical treatment caused financial difficulties in the past week | ANOVA        | Medical (& treatment) factors<br>Time since onset of disease | 10+ years post-diagnosis (ref: 5–9 years post-diagnosis,) | Significant     | +      | After      |
|                             |                                            |                                                                                        |              | Medical (& treatment) factors<br>Time since onset of disease | 10+ years post-diagnosis (ref: 5–9 years post-diagnosis,) | Not Significant | -      | After      |
|                             |                                            |                                                                                        |              | Medical (& treatment) factors<br>Time since onset of disease | 10+ years post-diagnosis (ref: 5–9 years post-diagnosis,) | Significant     | +      | After      |
|                             |                                            |                                                                                        |              | Medical (& treatment) factors<br>Time since onset of disease | 10+ years post-diagnosis (ref: 5–9 years post-diagnosis,) | Significant     | +      | After      |
|                             |                                            |                                                                                        |              | Medical (& treatment) factors<br>Time since onset of disease | 10+ years post-diagnosis (ref: 5–9 years post-diagnosis,) | Not Significant | -      | After      |

|                                |                |                                                                                        |                                                                                 |                                |                                                                                                                                |                 |   |        |
|--------------------------------|----------------|----------------------------------------------------------------------------------------|---------------------------------------------------------------------------------|--------------------------------|--------------------------------------------------------------------------------------------------------------------------------|-----------------|---|--------|
| Arndt et al.<br>(2019) [2]     | EORTC QLQ-C30  | Physical condition or medical treatment caused financial difficulties in the past week | t-Test                                                                          | Employment                     | Reduction of working hours within 1 year after return to work (ref: no reduction)                                              | Significant     | + | After  |
|                                | Validated      |                                                                                        |                                                                                 | Return to work                 |                                                                                                                                |                 |   |        |
|                                | Material       |                                                                                        | ANOVA                                                                           | Employment                     | Quitting Job due to cancer within 5 years after return to work (ref: no quitting)                                              | Significant     | + | After  |
|                                |                |                                                                                        |                                                                                 | Return to work                 |                                                                                                                                |                 |   |        |
|                                |                |                                                                                        |                                                                                 | Employment                     | Financial difficulties according to initial return to work status: Return to former work (p-value: comparison of three groups) | Significant     | - | After  |
|                                |                |                                                                                        |                                                                                 | Return to work                 |                                                                                                                                |                 |   |        |
| Barbarete et al.<br>(2017) [5] | Self-developed | The cost of treating cancer has caused patient or his/her family distress              | Chi <sup>2</sup> /t-Test (otherwise Mann-Whitney-U-test or Fisher's exact test) | Socio-demographic factors      | Gender: Female (ref: Male)                                                                                                     | Significant     | + | Before |
|                                | Not Validated  |                                                                                        |                                                                                 | Gender                         |                                                                                                                                |                 |   |        |
|                                | Psychosocial   |                                                                                        |                                                                                 | Socio-demographic factors      | Age                                                                                                                            | Significant     | - | Before |
|                                |                |                                                                                        |                                                                                 | Age                            |                                                                                                                                |                 |   |        |
|                                |                |                                                                                        |                                                                                 | Medical (& treatment) factors  | Average time between diagnosis and study                                                                                       | Not Significant | + | After  |
|                                |                |                                                                                        |                                                                                 | Time since onset of disease    |                                                                                                                                |                 |   |        |
|                                |                |                                                                                        |                                                                                 | Socio-demographic factors      | Familial Status: Single (ref: Married)                                                                                         | Significant     | + | Before |
|                                |                |                                                                                        |                                                                                 | Familial status                |                                                                                                                                |                 |   |        |
|                                |                |                                                                                        |                                                                                 | Socio-demographic factors      | Education level                                                                                                                | Not Significant | ~ | Before |
|                                |                |                                                                                        |                                                                                 | Education                      |                                                                                                                                |                 |   |        |
|                                |                |                                                                                        |                                                                                 | Financial resources            | Income <15,000 euros yearly (ref: >15,000)                                                                                     | Significant     | + | Before |
|                                |                |                                                                                        |                                                                                 | Pre-diagnosis financial status |                                                                                                                                |                 |   |        |

|                             |                                                 |                                                                            |                   |                                      |                               |                                                              |                                                                   |             |        |        |
|-----------------------------|-------------------------------------------------|----------------------------------------------------------------------------|-------------------|--------------------------------------|-------------------------------|--------------------------------------------------------------|-------------------------------------------------------------------|-------------|--------|--------|
|                             |                                                 |                                                                            |                   |                                      | Medical (& treatment) factors | ECOG                                                         | Not Significant                                                   | +           | During |        |
|                             |                                                 |                                                                            |                   |                                      | Well-being                    |                                                              |                                                                   |             |        |        |
|                             |                                                 |                                                                            |                   |                                      | Medical (& treatment) factors | Cancer Type Breast Cancer (ref: lung, prostate, colorectal)  | Significant                                                       | +           | During |        |
|                             |                                                 |                                                                            |                   |                                      | Cancer status                 |                                                              |                                                                   |             |        |        |
|                             |                                                 |                                                                            |                   |                                      | Medical (& treatment) factors | Cancer stage (metastatic, relapsed, locally advanced, other) | Not Significant                                                   | ~           | During |        |
|                             |                                                 |                                                                            |                   |                                      | Cancer status                 |                                                              |                                                                   |             |        |        |
|                             |                                                 |                                                                            |                   |                                      | Medical (& treatment) factors | Treatment: surgery                                           | Not Significant                                                   | ±           | During |        |
|                             |                                                 |                                                                            |                   |                                      | Treatment                     |                                                              |                                                                   |             |        |        |
|                             |                                                 |                                                                            |                   |                                      | Medical (& treatment) factors | Treatment: Chemotherapy                                      | Not Significant                                                   | ±           | During |        |
|                             |                                                 |                                                                            |                   |                                      | Treatment                     |                                                              |                                                                   |             |        |        |
|                             |                                                 |                                                                            |                   |                                      | Medical (& treatment) factors | Treatment: Radiotherapy                                      | Not Significant                                                   | ±           | During |        |
|                             |                                                 |                                                                            |                   |                                      | Treatment                     |                                                              |                                                                   |             |        |        |
|                             |                                                 |                                                                            |                   |                                      | Medical (& treatment) factors | Treatment: Target therapy                                    | Not Significant                                                   | +           | During |        |
|                             |                                                 |                                                                            |                   |                                      | Treatment                     |                                                              |                                                                   |             |        |        |
|                             |                                                 |                                                                            |                   |                                      | Pearson correlation           | Financial resources                                          | Subjective financial burden (impact of FD on patients' wellbeing) | Significant | +      | During |
|                             |                                                 |                                                                            |                   |                                      |                               | Cancer related financial impact                              |                                                                   |             |        |        |
|                             | Financial resources                             | Financial concerns                                                         | Significant       | +                                    | During                        |                                                              |                                                                   |             |        |        |
|                             | Cancer related financial impact                 |                                                                            |                   |                                      |                               |                                                              |                                                                   |             |        |        |
|                             | Financial resources                             | Financial worries                                                          | Significant       | +                                    | During                        |                                                              |                                                                   |             |        |        |
|                             | Cancer related financial impact                 |                                                                            |                   |                                      |                               |                                                              |                                                                   |             |        |        |
|                             | Financial resources                             | Actual financial difficulties                                              | Significant       | +                                    | During                        |                                                              |                                                                   |             |        |        |
|                             | Cancer related financial impact                 |                                                                            |                   |                                      |                               |                                                              |                                                                   |             |        |        |
| Barbarete et al. (2019) [6] | Self-developed<br>Not Validated<br>Psychosocial | The cost of treating cancer has caused patient or his/her family distress. | Linear regression | Socio-demographic factors<br>Country | Residence of France           | Significant                                                  | -                                                                 | Before      |        |        |



|                               |                                 |                                                                                              |                  |                                                    |                                         |              |        |        |
|-------------------------------|---------------------------------|----------------------------------------------------------------------------------------------|------------------|----------------------------------------------------|-----------------------------------------|--------------|--------|--------|
|                               |                                 |                                                                                              |                  | Medical (& treatment) factors                      | High HADS-D score                       | Significant  | +      | During |
|                               |                                 |                                                                                              |                  | Well-being                                         |                                         |              |        |        |
|                               |                                 |                                                                                              |                  | Medical (& treatment) factors                      | Lower HADS-D score                      | Significant  | -      | During |
|                               |                                 |                                                                                              |                  | Well-being                                         |                                         |              |        |        |
|                               |                                 |                                                                                              |                  | Socio-demographic factors                          | Greater Age                             | Significant  | -      | Before |
|                               |                                 |                                                                                              |                  | Age                                                |                                         |              |        |        |
|                               |                                 |                                                                                              |                  | Socio-demographic factors                          | Single status                           | Significant  | +      | Before |
|                               |                                 |                                                                                              |                  | Familial status                                    |                                         |              |        |        |
|                               |                                 |                                                                                              |                  | Medical (& treatment) factors                      | Functional and social well-being        | Significant  | -      | During |
|                               |                                 |                                                                                              |                  | Well-being                                         |                                         |              |        |        |
|                               |                                 |                                                                                              |                  | Medical (& treatment) factors                      | Metastasis                              | Significant  | +      | During |
|                               |                                 |                                                                                              |                  | Cancer status                                      |                                         |              |        |        |
|                               |                                 |                                                                                              |                  | Medical (& treatment) factors                      | Surgery                                 | Significant  | +      | During |
|                               |                                 |                                                                                              |                  | Treatment                                          |                                         |              |        |        |
| Medical (& treatment) factors | Physical well-being             | Not Significant                                                                              | -                | During                                             |                                         |              |        |        |
| Well-being                    |                                 |                                                                                              |                  |                                                    |                                         |              |        |        |
| Insurance                     | Government insurance            | Not Significant                                                                              | -                | During                                             |                                         |              |        |        |
| Health insurance              |                                 |                                                                                              |                  |                                                    |                                         |              |        |        |
| Büttner et al.<br>(2019) [7]  | EORTC QLQ-C30                   | Physical condition or medical<br>treatment caused financial<br>difficulties in the past week | Mean frequencies | Financial resources                                | Financial burden (end of hospital stay) | Not reported | ~      | During |
|                               | Cancer related financial impact |                                                                                              |                  |                                                    |                                         |              |        |        |
|                               | Financial resources             |                                                                                              |                  | Financial burden (3 month after hospital<br>stay)  | Not reported                            | ~            | During |        |
|                               | Cancer related financial impact |                                                                                              |                  |                                                    |                                         |              |        |        |
|                               | Financial resources             |                                                                                              |                  | Financial burden (15 month after hospital<br>stay) | Not reported                            | ~            | During |        |
|                               | Cancer related financial impact |                                                                                              |                  |                                                    |                                         |              |        |        |

|                            |               |                                                                                        |                   |                                |                                                           |                 |   |        |
|----------------------------|---------------|----------------------------------------------------------------------------------------|-------------------|--------------------------------|-----------------------------------------------------------|-----------------|---|--------|
|                            |               |                                                                                        |                   | Medical (& treatment) factors  | Time since diagnosis (end of hospital stay)               | Not reported    | ~ | During |
|                            |               |                                                                                        |                   | Time since onset of disease    |                                                           |                 |   |        |
|                            |               |                                                                                        |                   | Medical (& treatment) factors  | Time since diagnosis (3 month after hospital stay)        | Not reported    | ~ | During |
|                            |               |                                                                                        |                   | Time since onset of disease    |                                                           |                 |   |        |
|                            |               |                                                                                        |                   | Medical (& treatment) factors  | Time since diagnosis (15 month after hospital stay)       | Not reported    | ~ | During |
|                            |               |                                                                                        |                   | Time since onset of disease    |                                                           |                 |   |        |
|                            |               |                                                                                        |                   | Financial resources            | Income groups < €1000 (ref: >€1000)                       | Not reported    | + | Before |
|                            |               |                                                                                        |                   | Pre-diagnosis financial status |                                                           |                 |   |        |
|                            |               |                                                                                        |                   | Financial resources            | Income groups < €1000 (ref: >€1000)                       | Not reported    | + | Before |
|                            |               |                                                                                        |                   | Pre-diagnosis financial status |                                                           |                 |   |        |
|                            |               |                                                                                        |                   | Financial resources            | Income groups < €1000 (ref: >€1000)                       | Not reported    | + | Before |
|                            |               |                                                                                        |                   | Pre-diagnosis financial status |                                                           |                 |   |        |
|                            |               |                                                                                        |                   | Financial resources            | Income groups < €1000 (ref: >€1000)                       | Not reported    | + | Before |
|                            |               |                                                                                        |                   | Pre-diagnosis financial status |                                                           |                 |   |        |
| Doege et al.<br>(2019) [8] | EORTC QLQ-C30 | Physical condition or medical treatment caused financial difficulties in the past week | Linear regression | Medical (& treatment) factors  | ≥ 10 years post-diagnosis (ref: 5–9 years post-diagnosis) | Not Significant | + | After  |
|                            | Validated     |                                                                                        |                   | Time since onset of disease    |                                                           |                 |   |        |
|                            | Material      |                                                                                        |                   | Medical (& treatment) factors  | 5–9 years post-diagnosis (ref: control)                   | Significant     | + | After  |
|                            |               |                                                                                        |                   | Time since onset of disease    |                                                           |                 |   |        |
|                            |               |                                                                                        |                   | Medical (& treatment) factors  | ≥ 10 years post-diagnosis (ref: control)                  | Significant     | + | After  |
|                            |               |                                                                                        |                   | Time since onset of disease    |                                                           |                 |   |        |
|                            |               |                                                                                        |                   | Medical (& treatment) factors  | ≥ 10 years post-diagnosis (ref: 5–9 years post-diagnosis) | Not Significant | - | After  |
|                            |               |                                                                                        |                   | Time since onset of disease    |                                                           |                 |   |        |
|                            |               |                                                                                        |                   | Medical (& treatment) factors  | 5–9 years post-diagnosis (ref: control)                   | Significant     | + | After  |
|                            |               |                                                                                        |                   | Time since onset of disease    |                                                           |                 |   |        |
|                            |               |                                                                                        |                   | Medical (& treatment) factors  | ≥ 10 years post-diagnosis (ref: control)                  | Not Significant | + | After  |
|                            |               |                                                                                        |                   | Time since onset of disease    |                                                           |                 |   |        |
|                            |               |                                                                                        |                   | Medical (& treatment) factors  | ≥ 10 years post-diagnosis (ref: control)                  | Not Significant | + | After  |
|                            |               |                                                                                        |                   | Time since onset of disease    |                                                           |                 |   |        |

|                           |                                |                                                                                        |        |                           |                               |                                                           |                 |        |       |
|---------------------------|--------------------------------|----------------------------------------------------------------------------------------|--------|---------------------------|-------------------------------|-----------------------------------------------------------|-----------------|--------|-------|
|                           |                                |                                                                                        |        |                           | Medical (& treatment) factors | ≥ 10 years post-diagnosis (ref: 5–9 years post-diagnosis) | Not Significant | +      | After |
|                           |                                |                                                                                        |        |                           | Time since onset of disease   |                                                           |                 |        |       |
|                           |                                |                                                                                        |        |                           | Medical (& treatment) factors | 5–9 years post-diagnosis (ref: control)                   | Not Significant | +      | After |
|                           |                                |                                                                                        |        |                           | Time since onset of disease   |                                                           |                 |        |       |
|                           |                                |                                                                                        |        |                           | Medical (& treatment) factors | ≥ 10 years post-diagnosis (ref: control)                  | Not Significant | +      | After |
|                           |                                |                                                                                        |        |                           | Time since onset of disease   |                                                           |                 |        |       |
|                           |                                |                                                                                        |        |                           | Medical (& treatment) factors | ≥ 10 years post-diagnosis (ref: 5–9 years post-diagnosis) | Not Significant | +      | After |
|                           |                                |                                                                                        |        |                           | Time since onset of disease   |                                                           |                 |        |       |
|                           |                                |                                                                                        |        |                           | Medical (& treatment) factors | 5–9 years post-diagnosis (ref: control)                   | Not Significant | +      | After |
|                           |                                |                                                                                        |        |                           | Time since onset of disease   |                                                           |                 |        |       |
|                           |                                |                                                                                        |        |                           | Medical (& treatment) factors | ≥ 10 years post-diagnosis (ref: control)                  | Not Significant | +      | After |
|                           |                                |                                                                                        |        |                           | Time since onset of disease   |                                                           |                 |        |       |
|                           |                                |                                                                                        |        |                           | Medical (& treatment) factors | ≥ 10 years post-diagnosis (ref: 5–9 years post-diagnosis) | Not Significant | -      | After |
|                           |                                |                                                                                        |        |                           | Time since onset of disease   |                                                           |                 |        |       |
|                           |                                |                                                                                        |        |                           | Medical (& treatment) factors | 5–9 years post-diagnosis (ref: control)                   | Not Significant | +      | After |
|                           |                                |                                                                                        |        |                           | Time since onset of disease   |                                                           |                 |        |       |
|                           |                                |                                                                                        |        |                           | Medical (& treatment) factors | ≥ 10 years post-diagnosis (ref: control)                  | Not Significant | -      | After |
|                           |                                |                                                                                        |        |                           | Time since onset of disease   |                                                           |                 |        |       |
| Egestad et al. (2015) [9] | EORTC QLQ-C30, EORTC QLQ-H&N35 | Physical condition or medical treatment caused financial difficulties in the past week | t-Test | Socio-demographic factors | Men (ref: women)              | Not Significant                                           | -               | Before |       |
|                           |                                |                                                                                        |        | Gender                    |                               |                                                           |                 |        |       |
|                           |                                |                                                                                        |        | Socio-demographic factors | Men (ref: women)              | Not Significant                                           | +               | Before |       |
|                           |                                |                                                                                        |        | Gender                    |                               |                                                           |                 |        |       |
|                           |                                |                                                                                        |        |                           |                               |                                                           |                 |        |       |
|                           |                                |                                                                                        |        |                           |                               |                                                           |                 |        |       |

|                               |                                           |                 |   |        |
|-------------------------------|-------------------------------------------|-----------------|---|--------|
| Socio-demographic factors     | Men (ref: women)                          | Not Significant | - | Before |
| Gender                        |                                           |                 |   |        |
| Medical (& treatment) factors | Time since treatment: baseline (ref: end) | Not Significant | - | During |
| Time since onset of disease   |                                           |                 |   |        |
| Medical (& treatment) factors | Time since treatment: baseline (ref: end) | Not Significant | + | During |
| Time since onset of disease   |                                           |                 |   |        |
| Socio-demographic factors     | Age <65 years (ref: >65 years)            | Not Significant | - | Before |
| Age                           |                                           |                 |   |        |
| Socio-demographic factors     | Age <65 years (ref: >65 years)            | Not Significant | + | Before |
| Age                           |                                           |                 |   |        |
| Socio-demographic factors     | Age <65 years (ref: >65 years)            | Not Significant | ± | Before |
| Age                           |                                           |                 |   |        |
| Medical (& treatment) factors | Time since treatment baseline (ref: end)  | Not Significant | - | During |
| Time since onset of disease   |                                           |                 |   |        |
| Medical (& treatment) factors | Time since treatment baseline (ref: end)  | Not Significant | + | During |
| Time since onset of disease   |                                           |                 |   |        |
| Socio-demographic factors     | Marital status married (ref: single)      | Not Significant | ± | Before |
| Familial status               |                                           |                 |   |        |
| Socio-demographic factors     | Marital status married (ref: single)      | Not Significant | - | Before |
| Familial status               |                                           |                 |   |        |
| Socio-demographic factors     | Marital status married (ref: single)      | Not Significant | + | Before |
| Familial status               |                                           |                 |   |        |
| Medical (& treatment) factors | Time since treatment baseline (ref: end)  | Not Significant | + | During |
| Time since onset of disease   |                                           |                 |   |        |

|                              |                        |                                                                     |                     |                               |                                            |                 |   |        |
|------------------------------|------------------------|---------------------------------------------------------------------|---------------------|-------------------------------|--------------------------------------------|-----------------|---|--------|
|                              |                        |                                                                     |                     | Medical (& treatment) factors | Time since treatment baseline (ref: end)   | Not Significant | - | During |
|                              |                        |                                                                     |                     | Time since onset of disease   |                                            |                 |   |        |
|                              |                        |                                                                     |                     | Medical (& treatment) factors | Treatment RT alone (ref: Cisplatin and RT) | Not Significant | - | During |
|                              |                        |                                                                     |                     | Treatment                     |                                            |                 |   |        |
|                              |                        |                                                                     |                     | Medical (& treatment) factors | Treatment RT alone (ref: Cisplatin and RT) | Not Significant | + | During |
|                              |                        |                                                                     |                     | Treatment                     |                                            |                 |   |        |
|                              |                        |                                                                     |                     | Medical (& treatment) factors | Treatment RT alone (ref: Cisplatin and RT) | Not Significant | + | During |
|                              |                        |                                                                     |                     | Treatment                     |                                            |                 |   |        |
|                              |                        |                                                                     |                     | Medical (& treatment) factors | Time since treatment baseline (ref: end)   | Not Significant | - | During |
|                              |                        |                                                                     |                     | Time since onset of disease   |                                            |                 |   |        |
|                              |                        |                                                                     |                     | Medical (& treatment) factors | Time since treatment baseline (ref: end)   | Not Significant | + | During |
|                              |                        |                                                                     |                     | Time since onset of disease   |                                            |                 |   |        |
| Ezeife et al.<br>(2019) [10] | COST                   | Financial toxicity measured by the score of the COST.               | Logistic regression | Socio-demographic factors     | Age <65 (ref: >65)                         | Significant     | + | Before |
|                              | Validated              | Dichotomisation of the score for logistic regression (cut off: <21) |                     | Age                           |                                            |                 |   |        |
|                              | Material, Psychosocial |                                                                     |                     | Financial spending            | Total OOP 1000-5000\$ (ref: <1000\$)       | Significant     | + | During |
|                              |                        |                                                                     |                     | Cancer-related total costs    |                                            |                 |   |        |
|                              |                        |                                                                     |                     | Financial spending            | Total OOP 5000-10000\$ (ref: <1000\$)      | Significant     | + | During |
|                              |                        |                                                                     |                     | Cancer-related total costs    |                                            |                 |   |        |
|                              |                        |                                                                     |                     | Financial spending            | Total OOP >10000\$ (ref: <1000\$)          | Significant     | + | During |
|                              |                        |                                                                     |                     | Cancer-related total costs    |                                            |                 |   |        |
|                              |                        |                                                                     |                     | Insurance                     | Private health insurance (ref:No)          | Significant     | - | Before |
|                              |                        |                                                                     |                     | Health insurance              |                                            |                 |   |        |

|                            |                |                                                                             |             |                                 |                                                                |                 |   |        |
|----------------------------|----------------|-----------------------------------------------------------------------------|-------------|---------------------------------|----------------------------------------------------------------|-----------------|---|--------|
|                            |                |                                                                             |             | Socio-demographic factors       | Distance from Cancer centre >17 (ref: <17)                     | Not Significant | - | During |
|                            |                |                                                                             |             | Geography                       |                                                                |                 |   |        |
|                            |                |                                                                             |             | Medical (& treatment) factors   | Systemic therapy - not on clinical trial (ref: Clinical trial) | Not Significant | + | During |
|                            |                |                                                                             |             | Treatment                       |                                                                |                 |   |        |
|                            |                |                                                                             |             | Financial resources             | Annual income <40.000\$ (ref: >80.000\$)                       | Not Significant | + | Before |
|                            |                |                                                                             |             | Pre-diagnosis financial status  |                                                                |                 |   |        |
|                            |                |                                                                             |             | Financial resources             | Annual income 40-80.000\$ (ref: >80.000\$)                     | Not Significant | + | Before |
|                            |                |                                                                             |             | Pre-diagnosis financial status  |                                                                |                 |   |        |
| Gordon et al. (2017a) [11] | Self-developed | Not Validated<br>See questions asked<br>Material, Psychosocial, Behavioural | Frequencies | Financial spending              | Decided against treatment due to high expenses                 |                 |   | During |
|                            |                |                                                                             |             | Consequences of OOP             |                                                                |                 |   |        |
|                            |                |                                                                             |             | Financial spending              | Spend more for their cancer treatment than they expected       |                 |   | During |
|                            |                |                                                                             |             | Consequences of OOP             |                                                                |                 |   |        |
|                            |                |                                                                             |             | Medical (& treatment) factors   | Prostate cancer had caused them 'a great deal' of distress     |                 |   | During |
|                            |                |                                                                             |             | Cancer status                   |                                                                |                 |   |        |
|                            |                |                                                                             |             | Financial resources             | "Just getting" on or "struggling financially"                  |                 |   | During |
|                            |                |                                                                             |             | Cancer related financial impact |                                                                |                 |   |        |
|                            |                |                                                                             |             | Financial resources             | Drawn on savings to pay for treatment                          |                 |   | During |
|                            |                |                                                                             |             | Coping                          |                                                                |                 |   |        |
|                            |                |                                                                             |             | Financial resources             | Sold assets to pay for treatment                               |                 |   | During |
|                            |                |                                                                             |             | Coping                          |                                                                |                 |   |        |
|                            |                |                                                                             |             | Financial resources             | Increased a credit card limit to pay for treatment             |                 |   | During |
|                            |                |                                                                             |             | Coping                          |                                                                |                 |   |        |

|                            |                                     |                                                                                                                                                                   |                     |                                                              |                                                                    |                 |   |        |
|----------------------------|-------------------------------------|-------------------------------------------------------------------------------------------------------------------------------------------------------------------|---------------------|--------------------------------------------------------------|--------------------------------------------------------------------|-----------------|---|--------|
|                            |                                     |                                                                                                                                                                   | Not reported        | Medical (& treatment) factors<br>Time since onset of disease | Recently diagnosed with cancer (ref: responses of all respondents) | Not reported    | + | During |
| Gordon et al. (2017b) [12] | Self-developed                      | Financial hardship: Perceived prosperity, Financial strain, Ability to raise money                                                                                | Logistic regression | Financial resources                                          | Not financially comfortable                                        | Significant     | + | During |
|                            | Not Validated                       |                                                                                                                                                                   |                     | Cancer related financial impact                              |                                                                    |                 |   |        |
|                            | Material, Behavioural               |                                                                                                                                                                   |                     | Financial resources                                          | Action indicated financial strain                                  | Not Significant | + | During |
|                            |                                     |                                                                                                                                                                   |                     | Cancer related financial impact                              |                                                                    |                 |   |        |
| Gordon et al. (2020) [13]  |                                     | Financial toxicity measured by the score of the COST<br><br>Questions about employment, income in relation to distress, treatment decisions and personal distress | Frequencies         | Financial resources                                          | Unable to raise money easily                                       | Not Significant | + | During |
|                            |                                     |                                                                                                                                                                   |                     | Cancer related financial impact                              |                                                                    |                 |   |        |
|                            | Self-developed, COST                |                                                                                                                                                                   |                     | Financial spending                                           | Spending more money on the cost of treating cancer than expected   |                 |   | During |
|                            | Material, Psychosocial, Behavioural |                                                                                                                                                                   |                     | Consequences of OOP                                          |                                                                    |                 |   |        |
| Hanly et al. (2018) [14]   |                                     | How the patient felt about his/her household's financial situation                                                                                                | Logistic regression | Social circumstances                                         | Family distress                                                    |                 |   | During |
|                            |                                     |                                                                                                                                                                   |                     | Family                                                       |                                                                    |                 |   |        |
|                            |                                     |                                                                                                                                                                   |                     | Financial spending                                           | Cost was a consideration in choosing their cancer treatment course |                 |   | During |
|                            |                                     |                                                                                                                                                                   |                     | Consequences of OOP                                          |                                                                    |                 |   |        |
|                            |                                     |                                                                                                                                                                   |                     | Financial spending                                           | Not proceed with treatment due to cost                             |                 |   | During |
|                            |                                     |                                                                                                                                                                   |                     | Consequences of OOP                                          |                                                                    |                 |   |        |
|                            | Self-developed                      |                                                                                                                                                                   |                     | Medical (& treatment) factors                                | Stoma (ref: no stoma)                                              | Significant     | + | During |
|                            | Not Validated                       |                                                                                                                                                                   |                     | Treatment                                                    |                                                                    |                 |   |        |
|                            | Psychosocial                        |                                                                                                                                                                   |                     | Socio-demographic factors                                    | Dependents (ref: no dependants)                                    | Significant     | + | Before |
|                            |                                     |                                                                                                                                                                   |                     | Familial status                                              |                                                                    |                 |   |        |

|                          |                        |                                                      |                   |                               |                      |                                                                            |                 |   |        |
|--------------------------|------------------------|------------------------------------------------------|-------------------|-------------------------------|----------------------|----------------------------------------------------------------------------|-----------------|---|--------|
|                          |                        |                                                      |                   |                               | Social circumstances | Obtaining help from family members and friends (ref: no help)              | Significant     | + | During |
|                          |                        |                                                      |                   |                               | Support              |                                                                            |                 |   |        |
|                          |                        |                                                      |                   |                               | Financial resources  | Using saving (ref: savings, but not used)                                  | Significant     | + | During |
|                          |                        |                                                      |                   |                               | Coping               |                                                                            |                 |   |        |
|                          |                        |                                                      |                   |                               | Financial resources  | No savings (ref: savings not used)                                         | Significant     | + | During |
|                          |                        |                                                      |                   |                               | Coping               |                                                                            |                 |   |        |
| Honda et al. (2019) [15] | COST                   | Financial toxicity measured by the score of the COST | Linear regression | Socio-demographic factors     |                      |                                                                            |                 |   |        |
|                          | Validated              |                                                      |                   | Age                           |                      | Age (in years)                                                             | Significant     | - | Before |
|                          | Material, Psychosocial |                                                      |                   | Medical (& treatment) factors |                      |                                                                            |                 |   |        |
|                          |                        |                                                      |                   | Cancer status                 |                      | Local cancer stage (ref: metastatic)                                       | Not Significant | - | During |
|                          |                        |                                                      |                   | Medical (& treatment) factors |                      |                                                                            |                 |   |        |
|                          |                        |                                                      |                   | Time since onset of disease   |                      | Time to first chemotherapy, month                                          | Not Significant | + | During |
|                          |                        |                                                      |                   | Insurance                     |                      |                                                                            |                 |   |        |
|                          |                        |                                                      |                   | Health insurance              |                      | Private health insurance (ref: no)                                         | Not Significant | - | Before |
|                          |                        |                                                      |                   | Medical (& treatment) factors |                      |                                                                            |                 |   |        |
|                          |                        |                                                      |                   | Cancer status                 |                      | Number of admissions last year                                             | Not Significant | + | During |
|                          |                        |                                                      |                   | Financial spending            |                      |                                                                            |                 |   |        |
|                          |                        |                                                      |                   | Consequences of OOP           |                      | Use of strategies to cope with cost of cancer care expenses: Yes (ref: No) | Significant     | + | During |
|                          |                        |                                                      |                   | Socio-demographic factors     |                      |                                                                            |                 |   |        |
|                          |                        |                                                      |                   | Familial status               |                      | Marital status: Nonmarried (ref: Married)                                  | Not Significant | + | Before |
|                          |                        |                                                      |                   | Employment                    |                      |                                                                            |                 |   |        |
|                          |                        |                                                      |                   | Pre-diagnosis work status     |                      | Employment status: Part time (ref: Full time)                              | Significant     | + | During |
|                          |                        |                                                      |                   | Employment                    |                      |                                                                            |                 |   |        |
|                          |                        |                                                      |                   | Pre-diagnosis work status     |                      | Employment status: Retired, not because of cancer (ref: Full time)         | Not Significant | + | During |



|                                |                                                                    |                 |   |        |
|--------------------------------|--------------------------------------------------------------------|-----------------|---|--------|
| Employment                     | Employment status: Retired because of cancer (ref: Full time)      | Significant     | + | During |
| Pre-diagnosis work status      |                                                                    |                 |   |        |
| Employment                     | Employment status: Leave of absence (ref: Full time)               | Not Significant | + | During |
| Pre-diagnosis work status      |                                                                    |                 |   |        |
| Employment                     | Employment status: Not working outside home (ref: Full time)       | Not Significant | + | During |
| Pre-diagnosis work status      |                                                                    |                 |   |        |
| Financial resources            | Household income per year ¥2,000,000-3,999,999 (ref: <¥2,000,000)  | Not Significant | + | Before |
| Pre-diagnosis financial status |                                                                    |                 |   |        |
| Financial resources            | Household income per year ¥ 4,000,000-5,999,999 (ref: <¥2,000,000) | Not Significant | + | Before |
| Pre-diagnosis financial status |                                                                    |                 |   |        |
| Financial resources            | Household income per year ¥ 6,000,000-7,999,999 (ref: <¥2,000,000) | Not Significant | + | Before |
| Pre-diagnosis financial status |                                                                    |                 |   |        |
| Financial resources            | Household income per year ¥ 8,000,000-9,999,999 (ref: <¥2,000,000) | Not Significant | - | Before |
| Pre-diagnosis financial status |                                                                    |                 |   |        |
| Financial resources            | Household income per year ¥ >10,000,000 (ref: <¥2,000,000)         | Not Significant | + | Before |
| Pre-diagnosis financial status |                                                                    |                 |   |        |
| Financial resources            | Household savings ¥ 2,000,000-3,999,999 (ref: <¥2,000,000)         | Not significant | + | Before |
| Pre-diagnosis financial status |                                                                    |                 |   |        |
| Financial resources            | Household savings ¥ 4,000,000-5,999,999 (ref: <¥2,000,000)         | Significant     | - | Before |
| Pre-diagnosis financial status |                                                                    |                 |   |        |
| Financial resources            | Household savings ¥ 6,000,000-7,999,999 (ref: <¥2,000,000)         | Not Significant | + | Before |
| Pre-diagnosis financial status |                                                                    |                 |   |        |
| Financial resources            | Household savings ¥ 8,000,000-9,999,999 (ref: <¥2,000,000)         | Significant     | - | Before |
| Pre-diagnosis financial status |                                                                    |                 |   |        |

|                                 |               |                                                                                        |                     |                                |                                                                                      |                 |   |        |
|---------------------------------|---------------|----------------------------------------------------------------------------------------|---------------------|--------------------------------|--------------------------------------------------------------------------------------|-----------------|---|--------|
|                                 |               |                                                                                        |                     | Financial resources            | Household savings ¥ 10,000,000-14,999,999 (ref: <¥2,000,000)                         | Significant     | - | Before |
|                                 |               |                                                                                        |                     | Pre-diagnosis financial status |                                                                                      |                 |   |        |
|                                 |               |                                                                                        |                     | Financial resources            | Household savings ¥ >15,000,000 (ref: <¥2,000,000)                                   | Significant     | - | Before |
|                                 |               |                                                                                        |                     | Pre-diagnosis financial status |                                                                                      |                 |   |        |
| Ivanauskienė et al. (2014) [16] | EORTC QLQ-C30 | Physical condition or medical treatment caused financial difficulties in the past week | Logistic regression | Medical (& treatment) factors  | Underwent psychological counseling (ref: Did not seek for psychological counseling)  | Significant     | - | During |
|                                 | Validated     |                                                                                        |                     | Treatment                      |                                                                                      |                 |   |        |
|                                 | Material      |                                                                                        |                     | Employment                     | Not working (unemployed, retired, or being disabled by breast cancer) (ref: Working) | Significant     | + | During |
|                                 |               |                                                                                        |                     | Pre-diagnosis work status      |                                                                                      |                 |   |        |
|                                 |               |                                                                                        |                     | Medical (& treatment) factors  | Comorbidities >2 (ref: Comorbidities <2)                                             | Significant     | + | During |
| Kaptein et al. (2013) [17]      | EORTC QLQ-C30 | Physical condition or medical treatment caused financial difficulties in the past week | t-test or ANOVA     | Well-being                     |                                                                                      |                 |   |        |
|                                 | Validated     |                                                                                        |                     | Medical (& treatment) factors  | Surgery, radiotherapy, chemotherapy, and hormone therapy (ref: No)                   | Significant     | + | During |
|                                 | Material      |                                                                                        |                     | Treatment                      |                                                                                      |                 |   |        |
|                                 |               |                                                                                        |                     | Socio-demographic factors      | Country: Japan (ref: Netherlands)                                                    | Significant     | + | Before |
|                                 |               |                                                                                        |                     | Country                        |                                                                                      |                 |   |        |
| Koch et al. (2013) [18]         | EORTC QLQ-C30 | Physical condition or medical treatment caused financial difficulties in the past week | ANOVA               | Medical (& treatment) factors  | Occasion (Japan)                                                                     | Not Significant | - | During |
|                                 | Validated     |                                                                                        |                     | Time since onset of disease    |                                                                                      |                 |   |        |
|                                 | Material      |                                                                                        |                     | Medical (& treatment) factors  | Occasion (Netherlands)                                                               | Not Significant | + | During |
|                                 |               |                                                                                        |                     | Time since onset of disease    |                                                                                      |                 |   |        |
|                                 |               |                                                                                        |                     | Socio-demographic factors      | Age <49                                                                              | Significant     | + | Before |
|                                 |               |                                                                                        |                     | Age                            |                                                                                      |                 |   |        |
|                                 |               |                                                                                        |                     | Socio-demographic factors      | Age 50 - 64                                                                          | Significant     | + | Before |
|                                 |               |                                                                                        |                     | Age                            |                                                                                      |                 |   |        |
|                                 |               |                                                                                        |                     |                                |                                                                                      |                 |   |        |

|                               |                                                                                |             |   |        |
|-------------------------------|--------------------------------------------------------------------------------|-------------|---|--------|
| Socio-demographic factors     |                                                                                |             |   |        |
| Age                           | Age >65                                                                        | Significant | + | Before |
| Medical (& treatment) factors |                                                                                |             |   |        |
| Time since onset of disease   | Time since diagnosis - 3 years since diagnosis (ref: 1 year since diagnosis)   | Significant | - | During |
| Medical (& treatment) factors |                                                                                |             |   |        |
| Time since onset of disease   | Time since diagnosis - 5-7 years since diagnosis (ref: 3 year since diagnosis) | Significant | + | During |
| Medical (& treatment) factors |                                                                                |             |   |        |
| Time since onset of disease   | Time since diagnosis - 10 years since diagnosis (ref: 3 year since diagnosis)  | Significant | + | After  |
| Medical (& treatment) factors |                                                                                |             |   |        |
| Time since onset of disease   | Comparison over time for time since diagnosis                                  | Significant | ~ | After  |
| Medical (& treatment) factors |                                                                                |             |   |        |
| Time since onset of disease   | Time since diagnosis - 3 years since diagnosis (ref: 1 year since diagnosis)   | Significant | - | During |
| Medical (& treatment) factors |                                                                                |             |   |        |
| Time since onset of disease   | Time since diagnosis - 5-7 years since diagnosis (ref: 3 year since diagnosis) | Significant | + | After  |
| Medical (& treatment) factors |                                                                                |             |   |        |
| Time since onset of disease   | Time since diagnosis - 10 years since diagnosis (ref: 3 year since diagnosis)  | Significant | + | After  |
| Medical (& treatment) factors |                                                                                |             |   |        |
| Time since onset of disease   | Survivor (ref: control)                                                        | Significant | + | During |
| Medical (& treatment) factors |                                                                                |             |   |        |
| Time since onset of disease   | Survivor (ref: control)                                                        | Significant | + | During |
| Medical (& treatment) factors |                                                                                |             |   |        |
| Time since onset of disease   | Survivor (ref: control)                                                        | Significant | + | After  |
| Medical (& treatment) factors |                                                                                |             |   |        |
| Time since onset of disease   | Survivor (ref: control)                                                        | Significant | + | After  |

|                             |               |                                                                                        |                    | Medical (& treatment) factors  | Comparison over time for time since diagnosis                 | Significant     | ~ | After  |
|-----------------------------|---------------|----------------------------------------------------------------------------------------|--------------------|--------------------------------|---------------------------------------------------------------|-----------------|---|--------|
|                             |               |                                                                                        |                    | Time since onset of disease    |                                                               |                 |   |        |
| Koskinen et al. (2019) [19] | EORTC-QLQ-C30 | Physical condition or medical treatment caused financial difficulties in the past week | Linear regression  | Socio-demographic factors      |                                                               |                 |   |        |
|                             | Validated     |                                                                                        |                    | Age                            | Age                                                           | Significant     | - | Before |
|                             | Material      |                                                                                        |                    |                                |                                                               |                 |   |        |
|                             |               |                                                                                        |                    | Socio-demographic factors      |                                                               |                 |   |        |
|                             |               |                                                                                        |                    | Familial status                | Cohabiting                                                    | Significant     | - | Before |
|                             |               |                                                                                        |                    | Socio-demographic factors      |                                                               |                 |   |        |
|                             |               |                                                                                        |                    | Education                      | High education                                                | Significant     | - | Before |
|                             |               |                                                                                        |                    | Financial spending             |                                                               |                 |   |        |
|                             |               |                                                                                        |                    | Cancer-related total costs     | OOP payments                                                  | Significant     | + | During |
| Lu et al. (2019) [20]       |               | Feeling about household financial situation as a result of cancer.                     | Poisson regression | Financial spending             |                                                               |                 |   |        |
|                             |               |                                                                                        |                    | Cancer-related total costs     | Total costs                                                   | Significant     | + | During |
|                             |               |                                                                                        |                    |                                |                                                               |                 |   |        |
|                             |               |                                                                                        |                    | Employment                     |                                                               |                 |   |        |
|                             |               |                                                                                        |                    | Pre-diagnosis work status      | Unemployment                                                  | Significant     | + | Before |
|                             | Self-designed |                                                                                        |                    |                                |                                                               |                 |   |        |
|                             | Not Validated |                                                                                        |                    | Socio-demographic factors      |                                                               |                 |   |        |
|                             |               |                                                                                        |                    | Age                            | Age: 50-64 (ref: <50)                                         | Not significant | - | Before |
|                             | Psychosocial  |                                                                                        |                    |                                |                                                               |                 |   |        |
|                             |               |                                                                                        |                    | Socio-demographic factors      |                                                               |                 |   |        |
|                             |               |                                                                                        |                    | Age                            | Age: >64 (ref: <50)                                           | Significant     | - | Before |
|                             |               |                                                                                        |                    | Financial resources            |                                                               |                 |   |        |
|                             |               |                                                                                        |                    | Pre-diagnosis financial status | Pre-diagnosis financial stress - difficult (ref: easy)        | Significant     | + | Before |
|                             |               |                                                                                        |                    | Medical (& treatment) factors  |                                                               |                 |   |        |
|                             |               |                                                                                        |                    | Treatment                      | Initial treatment: Surgery + radiotherapy (ref: Surgery only) | Not significant | ± | During |

|                              |                                       |                                     |                   |                                                       |                                                                              |                 |   |        |
|------------------------------|---------------------------------------|-------------------------------------|-------------------|-------------------------------------------------------|------------------------------------------------------------------------------|-----------------|---|--------|
|                              |                                       |                                     |                   | Medical (& treatment) factors<br>Treatment            | Initial treatment: Radiotherapy only (ref: surgery only)                     | Not significant | + | During |
|                              |                                       |                                     |                   | Medical (& treatment) factors<br>Treatment            | Initial treatment: Chemotherapy ± radiotherapy (ref: surgery only)           | Not significant | + | During |
|                              |                                       |                                     |                   | Medical (& treatment) factors<br>Treatment            | Initial treatment: Chemotherapy + surgery ± radiotherapy (ref: surgery only) | Significant     | + | During |
|                              |                                       |                                     |                   | Medical (& treatment) factors<br>Treatment            | Initial treatment: Other (ref: surgery only)                                 | Not significant | - | During |
| Mandaliya et al. (2016) [21] | QLACS, HILDA<br>Validated<br>Material | Financial stress score of the HILDA | Linear regression | Socio-demographic factors<br>Gender                   | Gender                                                                       | Not significant | - | Before |
|                              |                                       |                                     |                   | Socio-demographic factors<br>Age                      | Age                                                                          | Not significant | - | Before |
|                              |                                       |                                     |                   | Socio-demographic factors<br>Country                  | Birth Country                                                                | Not significant | + | Before |
|                              |                                       |                                     |                   | Socio-demographic factors<br>Familial status          | Marital status                                                               | Not significant | + | Before |
|                              |                                       |                                     |                   | Socio-demographic factors<br>Familial status          | Number of children living in your care                                       | Not significant | + | Before |
|                              |                                       |                                     |                   | Financial resources<br>Pre-diagnosis financial status | Income                                                                       | Not significant | - | Before |
|                              |                                       |                                     |                   | Insurance<br>Health insurance                         | Health insurance                                                             | Significant     | - | Before |
|                              |                                       |                                     |                   | Medical (& treatment) factors<br>Treatment            | Number of treatments                                                         | Not significant | - | During |

|                           |                                                   |                                                       |                   |                                |                                                           |                 |   |        |
|---------------------------|---------------------------------------------------|-------------------------------------------------------|-------------------|--------------------------------|-----------------------------------------------------------|-----------------|---|--------|
|                           |                                                   |                                                       |                   | Employment                     | Employment: Retired (ref: Employed)                       | Not significant | - | After  |
|                           |                                                   |                                                       |                   | Pre-diagnosis work status      |                                                           |                 |   |        |
|                           |                                                   |                                                       |                   | Employment                     | Employment: Not employed (ref: Employed)                  | Not significant | + | After  |
|                           |                                                   |                                                       |                   | Pre-diagnosis work status      |                                                           |                 |   |        |
|                           |                                                   |                                                       |                   | Socio-demographic factors      | Education: No formal education & other (ref: High school) | Not significant | - | Before |
|                           |                                                   |                                                       |                   | Education                      |                                                           |                 |   |        |
|                           |                                                   |                                                       |                   | Socio-demographic factors      | Education: University or Vocational (ref: High school)    | Not significant | - | Before |
|                           |                                                   |                                                       |                   | Education                      |                                                           |                 |   |        |
|                           |                                                   |                                                       |                   | Medical (& treatment) factors  | Cancer type: Colon/rectum/bowel (ref: breast)             | Not significant | - | During |
| McLean et al. (2020) [22] | COST, iPCQ<br>Validated<br>Material, Psychosocial | Financial toxicity measured by the score of the COST. | Linear regression | Cancer status                  |                                                           |                 |   |        |
|                           |                                                   |                                                       |                   | Medical (& treatment) factors  | Cancer type: Other (ref: breast)                          | Not significant | + | During |
|                           |                                                   |                                                       |                   | Cancer status                  |                                                           |                 |   |        |
|                           |                                                   |                                                       |                   | Socio-demographic factors      | Age                                                       | Significant     | - | Before |
|                           |                                                   |                                                       |                   | Age                            |                                                           |                 |   |        |
|                           |                                                   |                                                       |                   | Socio-demographic factors      | Sex: Female (ref: Male)                                   | Not significant | + | Before |
|                           |                                                   |                                                       |                   | Gender                         |                                                           |                 |   |        |
|                           |                                                   |                                                       |                   | Socio-demographic factors      | ARIA-Index                                                | Not significant | - | During |
|                           |                                                   |                                                       |                   | Geography                      |                                                           |                 |   |        |
|                           |                                                   |                                                       |                   | Financial resources            | Income 50 000 to 75 000                                   | Not significant | + | Before |
|                           |                                                   |                                                       |                   | Pre-diagnosis financial status |                                                           |                 |   |        |
|                           |                                                   |                                                       |                   | Financial resources            | Income 75 000 to 100 000                                  | Not significant | + | Before |
|                           |                                                   |                                                       |                   | Pre-diagnosis financial status |                                                           |                 |   |        |
|                           |                                                   |                                                       |                   | Financial resources            | Income >100 000                                           | Not significant | + | Before |
|                           |                                                   |                                                       |                   | Pre-diagnosis financial status |                                                           |                 |   |        |
|                           |                                                   |                                                       |                   | Financial resources            |                                                           |                 |   |        |
|                           |                                                   |                                                       |                   | Pre-diagnosis financial status |                                                           |                 |   |        |
|                           |                                                   |                                                       |                   | Financial resources            |                                                           |                 |   |        |

|                              |                                           |                                                                                                 |                     |                               |                                                                   |                 |   |        |
|------------------------------|-------------------------------------------|-------------------------------------------------------------------------------------------------|---------------------|-------------------------------|-------------------------------------------------------------------|-----------------|---|--------|
| McNeil et al.<br>(2019) [23] | AYA survey                                | The experience of any financial difficulties as a consequence of cancer diagnosis and treatment | Logistic regression | Socio-demographic factors     | Gender: Male (ref: Female)                                        | Not significant | - | Before |
|                              | Not Validated                             |                                                                                                 |                     | Gender                        |                                                                   |                 |   |        |
|                              | Material                                  |                                                                                                 |                     | Socio-demographic factors     | Geography: Regional/rural (ref: Metropolitan)                     | Not significant | + | Before |
|                              |                                           |                                                                                                 |                     | Geography                     |                                                                   |                 |   |        |
|                              |                                           |                                                                                                 |                     | Socio-demographic factors     | Living arrangement: Family home (ref: Living outside family home) | Significant     | - | Before |
|                              |                                           |                                                                                                 |                     | Familial status               |                                                                   |                 |   |        |
|                              |                                           |                                                                                                 |                     | Employment                    | Employment status: Unemployed (ref: Employed)                     | Not significant | + | During |
|                              |                                           |                                                                                                 |                     | Pre-diagnosis work status     |                                                                   |                 |   |        |
|                              |                                           |                                                                                                 |                     | Socio-demographic factors     | Age at diagnosis: 20-25 (ref: 15-19 years)                        | Significant     | + | Before |
| Mehlis et al.<br>(2020) [24] | Self-developed, NCCN Distress Thermometer | How much one has been distressed in the last week, including today                              | Linear regression   | Medical (& treatment) factors | Length of hospital stay: Long stay (ref: short stay)              | Not significant | + | During |
|                              | Not Validated                             |                                                                                                 |                     | Treatment                     |                                                                   |                 |   |        |
|                              | Material, Psychosocial, Behavioural       |                                                                                                 |                     | Medical (& treatment) factors | On/off treatment: On treatment (ref: Off treatment)               | Not significant | + | During |
|                              |                                           |                                                                                                 |                     | Treatment                     |                                                                   |                 |   |        |
|                              |                                           |                                                                                                 |                     | Medical (& treatment) factors | Treatment setting: Adult (ref: Pediatric)                         | Not significant | - | During |
|                              |                                           |                                                                                                 |                     | Treatment                     |                                                                   |                 |   |        |
|                              |                                           |                                                                                                 |                     | Medical (& treatment) factors | Cancer type: Blood cancer (ref: Other)                            | Not significant | - | During |
|                              |                                           |                                                                                                 |                     | Cancer status                 |                                                                   |                 |   |        |
|                              |                                           |                                                                                                 |                     | Medical (& treatment) factors | Primary tumor: Neuroendocrine (ref: Colorectal)                   | Not significant | + | During |
|                              |                                           |                                                                                                 |                     | Cancer status                 |                                                                   |                 |   |        |
|                              |                                           |                                                                                                 |                     | Socio-demographic factors     | Sex: Female (ref: Male)                                           | Significant     | + | Before |
|                              |                                           |                                                                                                 |                     | Gender                        |                                                                   |                 |   |        |

|                                  |                                         |                                                                                                                                                   |                   |                           |                                                   |                                        |                 |        |        |
|----------------------------------|-----------------------------------------|---------------------------------------------------------------------------------------------------------------------------------------------------|-------------------|---------------------------|---------------------------------------------------|----------------------------------------|-----------------|--------|--------|
|                                  |                                         |                                                                                                                                                   |                   |                           | Socio-demographic factors                         | Age                                    | Not significant | ±      | Before |
|                                  |                                         |                                                                                                                                                   |                   |                           | Age                                               |                                        |                 |        |        |
|                                  |                                         |                                                                                                                                                   |                   |                           | Socio-demographic factors                         | Number of children living in household | Not significant | -      | Before |
|                                  |                                         |                                                                                                                                                   |                   |                           | Familial status                                   |                                        |                 |        |        |
|                                  |                                         |                                                                                                                                                   |                   |                           | Employment                                        | Unemployed                             | Not significant | -      | During |
|                                  |                                         |                                                                                                                                                   |                   |                           | Pre-diagnosis work status                         |                                        |                 |        |        |
|                                  |                                         |                                                                                                                                                   |                   |                           | Employment                                        | Retired                                | Not significant | -      | During |
|                                  |                                         |                                                                                                                                                   |                   |                           | Pre-diagnosis work status                         |                                        |                 |        |        |
|                                  |                                         |                                                                                                                                                   |                   |                           | Insurance                                         | Private health insurance               | Significant     | -      | Before |
|                                  |                                         |                                                                                                                                                   |                   |                           | Health insurance                                  |                                        |                 |        |        |
|                                  |                                         |                                                                                                                                                   |                   |                           | Medical (& treatment) factors                     | Intensity of therapy                   | Not significant | +      | During |
|                                  |                                         |                                                                                                                                                   |                   |                           | Treatment                                         |                                        |                 |        |        |
|                                  |                                         |                                                                                                                                                   |                   |                           | Medical (& treatment) factors                     | Duration of therapy                    | Not significant | -      | During |
|                                  |                                         |                                                                                                                                                   |                   |                           | Treatment                                         |                                        |                 |        |        |
|                                  |                                         |                                                                                                                                                   |                   |                           | Medical (& treatment) factors                     | Duration of illness                    | Not significant | +      | During |
|                                  |                                         |                                                                                                                                                   |                   |                           | Treatment                                         |                                        |                 |        |        |
|                                  |                                         |                                                                                                                                                   |                   |                           | Financial resources                               | Financial loss relative to income      | Significant     | +      | During |
|                                  |                                         |                                                                                                                                                   |                   |                           | Cancer related financial impact                   |                                        |                 |        |        |
| Mercadante et al.<br>(2020) [25] | Financial distress item within the ESAS | Having more financial distress than psychological distress or distress about physical functioning or social/family distress or emotional distress | Linear regression | Socio-demographic factors | Age                                               | Significant                            | +               | Before |        |
|                                  | Not Validated                           |                                                                                                                                                   |                   | Age                       |                                                   |                                        |                 |        |        |
|                                  | Psychosocial                            |                                                                                                                                                   |                   | Socio-demographic factors | Marital status: Divorced or separated (ref: n.s.) | Significant                            | +               | Before |        |
|                                  |                                         |                                                                                                                                                   |                   | Familial status           |                                                   |                                        |                 |        |        |



|                            |                                             |                                                                                                                                                                                                                                                                                                                                          |                        |                                 |                                                                                           |                 |   |        |
|----------------------------|---------------------------------------------|------------------------------------------------------------------------------------------------------------------------------------------------------------------------------------------------------------------------------------------------------------------------------------------------------------------------------------------|------------------------|---------------------------------|-------------------------------------------------------------------------------------------|-----------------|---|--------|
| Paul et al. (2013)<br>[26] | Self-developed<br>Not Validated<br>Material | Since receiving diagnosis, did any of the following occur as a result of having cancer tests or treatment: (a) "Had to take time off work," (b) "Had less income," (c) "Had to leave work or close business," (d) "Had difficulty with bills or other payments," (e) "Had trouble with day to day expenses," (f) "Used up your savings," | Chi <sup>2</sup> -Test | Medical (& treatment) factors   | ESAS anxiety                                                                              | Significant     | + | During |
|                            |                                             |                                                                                                                                                                                                                                                                                                                                          |                        | Well-being                      |                                                                                           |                 |   |        |
|                            |                                             |                                                                                                                                                                                                                                                                                                                                          |                        | Medical (& treatment) factors   | Total ESAS                                                                                | Significant     | + | During |
|                            |                                             |                                                                                                                                                                                                                                                                                                                                          |                        | Well-being                      |                                                                                           |                 |   |        |
|                            |                                             |                                                                                                                                                                                                                                                                                                                                          |                        | Medical (& treatment) factors   | Poor social/family well-being                                                             | Significant     | + | During |
|                            |                                             |                                                                                                                                                                                                                                                                                                                                          |                        | Well-being                      |                                                                                           |                 |   |        |
|                            |                                             |                                                                                                                                                                                                                                                                                                                                          |                        | Medical (& treatment) factors   | HADS-A                                                                                    | Significant     | + | During |
|                            |                                             |                                                                                                                                                                                                                                                                                                                                          |                        | Well-being                      |                                                                                           |                 |   |        |
|                            |                                             |                                                                                                                                                                                                                                                                                                                                          |                        | Medical (& treatment) factors   | Global HADS                                                                               | Significant     | + | During |
|                            |                                             |                                                                                                                                                                                                                                                                                                                                          |                        | Well-being                      |                                                                                           |                 |   |        |
|                            |                                             |                                                                                                                                                                                                                                                                                                                                          |                        |                                 |                                                                                           |                 |   |        |
|                            |                                             |                                                                                                                                                                                                                                                                                                                                          |                        |                                 |                                                                                           |                 |   |        |
|                            |                                             |                                                                                                                                                                                                                                                                                                                                          |                        | Employment                      | Had to take time off work - Metropolitan region (ref: non-metropolitan)                   | Not significant | + | During |
|                            |                                             |                                                                                                                                                                                                                                                                                                                                          |                        | Direct implications             |                                                                                           |                 |   |        |
|                            |                                             |                                                                                                                                                                                                                                                                                                                                          |                        | Employment                      | Had to leave work or close business - Metropolitan region (ref: non-metropolitan)         | Not significant | + | During |
|                            |                                             |                                                                                                                                                                                                                                                                                                                                          |                        | Direct implications             |                                                                                           |                 |   |        |
|                            |                                             |                                                                                                                                                                                                                                                                                                                                          |                        | Financial resources             | Had less income - Metropolitan region (Ref: non-metropolitan)                             | Significant     | + | During |
|                            |                                             |                                                                                                                                                                                                                                                                                                                                          |                        | Pre-diagnosis financial status  |                                                                                           |                 |   |        |
|                            |                                             |                                                                                                                                                                                                                                                                                                                                          |                        | Financial resources             | Had difficulty with bills or other payments - Metropolitan region (ref: non-metropolitan) | Not significant | + | During |
|                            |                                             |                                                                                                                                                                                                                                                                                                                                          |                        | Cancer related financial impact |                                                                                           |                 |   |        |
|                            |                                             |                                                                                                                                                                                                                                                                                                                                          |                        | Financial resources             | Used up savings - Metropolitan region (ref: non-metropolitan)                             | Not significant | + | During |
|                            |                                             |                                                                                                                                                                                                                                                                                                                                          |                        | Coping                          |                                                                                           |                 |   |        |

|                              |                                        |                                                                                        |                     |                                 |                                                                                    |                 |   |        |
|------------------------------|----------------------------------------|----------------------------------------------------------------------------------------|---------------------|---------------------------------|------------------------------------------------------------------------------------|-----------------|---|--------|
| Pearce et al.<br>(2019) [27] | EORTC QLQ-C30<br>Validated<br>Material | Physical condition or medical treatment caused financial difficulties in the past week | Logistic regression | Financial resources             | Had trouble with day-to-day expenses - Metropolitan region (ref: non-metropolitan) | Not significant | + | During |
|                              |                                        |                                                                                        |                     | Cancer related financial impact |                                                                                    |                 |   |        |
|                              |                                        |                                                                                        |                     | Socio-demographic factors       | Living in a major city (ref: non-metropolitan)                                     | Significant     | + | Before |
|                              |                                        |                                                                                        |                     | Geography                       |                                                                                    |                 |   |        |
|                              |                                        |                                                                                        |                     | Socio-demographic factors       | Age in years                                                                       | Significant     | + | Before |
|                              |                                        |                                                                                        |                     | Age                             |                                                                                    |                 |   |        |
|                              |                                        |                                                                                        |                     | Socio-demographic factors       | Age <sup>2</sup>                                                                   | Significant     | - | Before |
|                              |                                        |                                                                                        |                     | Age                             |                                                                                    |                 |   |        |
|                              |                                        |                                                                                        |                     | Socio-demographic factors       | Marital status: Married (ref: Not married)                                         | Significant     | - | Before |
|                              |                                        |                                                                                        |                     | Familial status                 |                                                                                    |                 |   |        |
|                              |                                        |                                                                                        |                     | Socio-demographic factors       | Education: High education (ref: Low education)                                     | Significant     | - | Before |
|                              |                                        |                                                                                        |                     | Education                       |                                                                                    |                 |   |        |
|                              |                                        |                                                                                        |                     | Socio-demographic factors       | Socioeconomic status: Medium SES (ref: low SES)                                    | Significant     | - | Before |
|                              |                                        |                                                                                        |                     | Socioeconomic status            |                                                                                    |                 |   |        |
|                              |                                        |                                                                                        |                     | Socio-demographic factors       | Socioeconomic status: High SES (ref: low SES)                                      | Significant     | - | Before |
|                              |                                        |                                                                                        |                     | Socioeconomic status            |                                                                                    |                 |   |        |
|                              |                                        |                                                                                        |                     | Employment                      | Employment: Paid employment (ref: No paid employment)                              | Not Significant | - | After  |
|                              |                                        |                                                                                        |                     | Pre-diagnosis work status       |                                                                                    |                 |   |        |
|                              |                                        |                                                                                        |                     | Medical (& treatment) factors   | Tumour type: Colorectal (ref: Basal cell carcinoma)                                | Significant     | + | During |
|                              |                                        |                                                                                        |                     | Cancer status                   |                                                                                    |                 |   |        |
|                              |                                        |                                                                                        |                     | Medical (& treatment) factors   | Tumour type: Prostate (ref: Basal cell carcinoma)                                  | Not Significant | + | During |
|                              |                                        |                                                                                        |                     | Cancer status                   |                                                                                    |                 |   |        |
|                              |                                        |                                                                                        |                     | Medical (& treatment) factors   | Tumour type: Gynaecological (ref: Basal cell carcinoma)                            | Not Significant | + | During |
|                              |                                        |                                                                                        |                     | Cancer status                   |                                                                                    |                 |   |        |

|                                                |                                                         |                 |   |        |
|------------------------------------------------|---------------------------------------------------------|-----------------|---|--------|
| Medical (& treatment) factors<br>Cancer status | Tumour type: Haematological (ref: Basal cell carcinoma) | Not Significant | + | During |
| Medical (& treatment) factors<br>Cancer status | Tumour type: Melanoma (ref: Basal cell carcinoma)       | Not Significant | - | During |
| Medical (& treatment) factors<br>Cancer status | Tumour type: Thyroid (ref: Basal cell carcinoma)        | Not Significant | + | During |
| Socio-demographic factors<br>Gender            | Gender: Male (ref: female)                              | Significant     | + | Before |
| Medical (& treatment) factors<br>Well-being    | Physical functioning                                    | Not Significant | - | During |
| Medical (& treatment) factors<br>Well-being    | Role functioning                                        | Not Significant | - | After  |
| Medical (& treatment) factors<br>Well-being    | Emotional functioning                                   | Significant     | - | After  |
| Medical (& treatment) factors<br>Well-being    | Cognitive functioning                                   | Significant     | - | After  |
| Medical (& treatment) factors<br>Well-being    | Social functioning                                      | Significant     | - | After  |
| Medical (& treatment) factors<br>Well-being    | Global health status/QoL                                | Not Significant | - | After  |
| Medical (& treatment) factors<br>Side effect   | Fatigue                                                 | Not Significant | - | After  |
| Medical (& treatment) factors<br>Side effect   | Nausea/vomiting                                         | Not Significant | - | After  |

|                               |                                                |                 |   |              |
|-------------------------------|------------------------------------------------|-----------------|---|--------------|
| Medical (& treatment) factors | Pain                                           | Not Significant | + | After        |
| Side effect                   |                                                |                 |   |              |
| Medical (& treatment) factors | Dyspnoea                                       | Not Significant | + | After        |
| Side effect                   |                                                |                 |   |              |
| Medical (& treatment) factors | Insomnia                                       | Not Significant | + | After        |
| Side effect                   |                                                |                 |   |              |
| Medical (& treatment) factors | Appetite loss                                  | Not Significant | - | After        |
| Side effect                   |                                                |                 |   |              |
| Medical (& treatment) factors | Constipation                                   | Not Significant | + | After        |
| Side effect                   |                                                |                 |   |              |
| Medical (& treatment) factors | Diarrhoea                                      | Not Significant | - | After        |
| Side effect                   |                                                |                 |   |              |
| Medical (& treatment) factors | Time since diagnosis                           | Not Significant | - | During/After |
| Time since onset of disease   |                                                |                 |   |              |
| Employment                    | Interaction: time since diagnosis x employment | Significant     | + | After        |
| Return to work                |                                                |                 |   |              |
| Socio-demographic factors     | Age in years                                   | Significant     | + | Before       |
| Age                           |                                                |                 |   |              |
| Socio-demographic factors     | Age <sup>2</sup>                               | Significant     | - | Before       |
| Age                           |                                                |                 |   |              |
| Socio-demographic factors     | Marital status: Married (ref: Not married)     | Not Significant | - | Before       |
| Familial status               |                                                |                 |   |              |
| Socio-demographic factors     | Education: High education (ref: Low education) | Not Significant | - | Before       |
| Education                     |                                                |                 |   |              |

|                               |                                                         |                 |   |        |
|-------------------------------|---------------------------------------------------------|-----------------|---|--------|
| Socio-demographic factors     | Socioeconomic status: Medium SES (ref: low SES)         | Significant     | - | Before |
| Socioeconomic status          |                                                         |                 |   |        |
| Socio-demographic factors     | Socioeconomic status: High SES (ref: low SES)           | Significant     | - | Before |
| Socioeconomic status          |                                                         |                 |   |        |
| Employment                    | Employment: Paid employment (ref: No paid employment)   | Significant     | - | After  |
| Pre-diagnosis work status     |                                                         |                 |   |        |
| Medical (& treatment) factors | Tumour type: Colorectal (ref: Basal cell carcinoma)     | Significant     | + | During |
| Cancer status                 |                                                         |                 |   |        |
| Medical (& treatment) factors | Tumour type: Prostate (ref: Basal cell carcinoma)       | Not Significant | + | During |
| Cancer status                 |                                                         |                 |   |        |
| Medical (& treatment) factors | Tumour type: Gynaecological (ref: Basal cell carcinoma) | Not Significant | + | During |
| Cancer status                 |                                                         |                 |   |        |
| Medical (& treatment) factors | Tumour type: Haematological (ref: Basal cell carcinoma) | Not Significant | + | During |
| Cancer status                 |                                                         |                 |   |        |
| Medical (& treatment) factors | Tumour type: Melanoma (ref: Basal cell carcinoma)       | Not Significant | + | During |
| Cancer status                 |                                                         |                 |   |        |
| Medical (& treatment) factors | Tumour type: Thyroid (ref: Basal cell carcinoma)        | Not Significant | + | During |
| Cancer status                 |                                                         |                 |   |        |
| Socio-demographic factors     | Gender: Male (ref: female)                              | Significant     | + | Before |
| Gender                        |                                                         |                 |   |        |
| Medical (& treatment) factors | Physical functioning                                    | Not Significant | + | After  |
| Well-being                    |                                                         |                 |   |        |
| Medical (& treatment) factors | Role functioning                                        | Not Significant | - | After  |
| Well-being                    |                                                         |                 |   |        |

|                                              |                          |                 |   |       |
|----------------------------------------------|--------------------------|-----------------|---|-------|
| Medical (& treatment) factors<br>Well-being  | Emotional functioning    | Significant     | - | After |
| Medical (& treatment) factors<br>Well-being  | Cognitive functioning    | Significant     | - | After |
| Medical (& treatment) factors<br>Well-being  | Social functioning       | Significant     | - | After |
| Medical (& treatment) factors<br>Well-being  | Global health status/QoL | Not Significant | - | After |
| Medical (& treatment) factors<br>Side effect | Fatigue                  | Not Significant | + | After |
| Medical (& treatment) factors<br>Side effect | Nausea/vomiting          | Not Significant | - | After |
| Medical (& treatment) factors<br>Side effect | Pain                     | Not Significant | - | After |
| Medical (& treatment) factors<br>Side effect | Dyspnoea                 | Not Significant | + | After |
| Medical (& treatment) factors<br>Side effect | Insomnia                 | Not Significant | + | After |
| Medical (& treatment) factors<br>Side effect | Appetite loss            | Not Significant | - | After |
| Medical (& treatment) factors<br>Side effect | Constipation             | Not Significant | + | After |
| Medical (& treatment) factors<br>Side effect | Diarrhoea                | Not Significant | - | After |

|                            |                |                                                                                        |                    |                                                                         |                                                          |                 |        |              |
|----------------------------|----------------|----------------------------------------------------------------------------------------|--------------------|-------------------------------------------------------------------------|----------------------------------------------------------|-----------------|--------|--------------|
|                            |                |                                                                                        |                    | Medical (& treatment) factors                                           | Time since diagnosis                                     | Not Significant | -      | During/After |
|                            |                |                                                                                        |                    | Time since onset of disease                                             |                                                          |                 |        |              |
|                            |                |                                                                                        |                    | Employment                                                              | Interaction: time since diagnosis x employment           | Not Significant | +      | During/After |
|                            |                |                                                                                        |                    | Return to work                                                          |                                                          |                 |        |              |
| Schmidt et al. (2019) [28] | EORTC QLQ-C30  | Physical condition or medical treatment caused financial difficulties in the past week | Frequencies        | Employment                                                              | Cessation of work                                        | Significant     | +      | After        |
|                            | Validated      |                                                                                        |                    |                                                                         |                                                          |                 |        |              |
|                            | Material       |                                                                                        |                    |                                                                         |                                                          |                 |        |              |
|                            |                |                                                                                        | Mean values        | Employment                                                              | Working status discontinued (ref: reduced working hours) | Not reported    | ±      | During       |
|                            |                | Return to work                                                                         |                    |                                                                         |                                                          |                 |        |              |
|                            |                | Employment                                                                             |                    | Working status discontinued (ref: reduced working hours)                | Not reported                                             | ±               | During |              |
|                            |                | Return to work                                                                         |                    |                                                                         |                                                          |                 |        |              |
|                            |                | Employment                                                                             |                    | Working status discontinued (ref: reduced working hours)                | Not reported                                             | +               | After  |              |
|                            |                | Return to work                                                                         |                    |                                                                         |                                                          |                 |        |              |
|                            |                | Employment                                                                             |                    | Working status reduced working hours (ref: worked as before diagnosis)  | Not reported                                             | +               | During |              |
|                            |                | Return to work                                                                         |                    |                                                                         |                                                          |                 |        |              |
|                            |                | Employment                                                                             |                    | Working status reduced working hours (ref: worked as before diagnosis)  | Not reported                                             | +               | During |              |
|                            | Return to work |                                                                                        |                    |                                                                         |                                                          |                 |        |              |
|                            | Employment     | Working status reduced working hours (ref: worked as before diagnosis)                 | Not reported       | +                                                                       | After                                                    |                 |        |              |
|                            | Return to work |                                                                                        |                    |                                                                         |                                                          |                 |        |              |
|                            |                | ANCOVA                                                                                 | Employment         | Working status over time discontinued (ref: worked as before diagnosis) | Significant                                              | +               | After  |              |
|                            |                |                                                                                        | Return to work     |                                                                         |                                                          |                 |        |              |
| Sharp et al. (2016) [29]   | Self-developed | The impact of the cancer diagnosis on the household's ability to make ends meet        | Poisson regression | Socio-demographic factors                                               | Female: breast cancer (ref: Male: prostate cancer)       | Significant     | -      | During       |
|                            | Not Validated  |                                                                                        |                    | Gender                                                                  |                                                          |                 |        |              |
|                            | Material       |                                                                                        |                    |                                                                         |                                                          |                 |        |              |

|                                |                                                                                               |                 |   |        |
|--------------------------------|-----------------------------------------------------------------------------------------------|-----------------|---|--------|
| Socio-demographic factors      |                                                                                               |                 |   |        |
| Familial status                | Dependants: One or more (ref: None)                                                           | Significant     | + | Before |
| Employment                     |                                                                                               |                 |   |        |
| Pre-diagnosis work status      | Employment status at diagnosis: Self-employed (ref: Working for employer)                     | Not Significant | + | Before |
| Employment                     |                                                                                               |                 |   |        |
| Pre-diagnosis work status      | Employment status at diagnosis: Not working (ref: Working for employer)                       | Significant     | - | Before |
| Employment                     |                                                                                               |                 |   |        |
| Pre-diagnosis work status      | Employment status at diagnosis: Retired (ref: Working for employer)                           | Significant     | - | Before |
| Financial resources            |                                                                                               |                 |   |        |
| Pre-diagnosis financial status | Household income pre-diagnosis: Second quartile (ref: Lowest quartile)                        | Significant     | - | Before |
| Financial resources            |                                                                                               |                 |   |        |
| Pre-diagnosis financial status | Household income pre-diagnosis: Third quartile (ref: Lowest quartile)                         | Significant     | - | Before |
| Financial resources            |                                                                                               |                 |   |        |
| Pre-diagnosis financial status | Household income pre-diagnosis: Highest quartile (ref: Lowest quartile)                       | Not Significant | - | Before |
| Financial resources            |                                                                                               |                 |   |        |
| Pre-diagnosis financial status | Household income pre-diagnosis: Not stated (ref: Lowest quartile)                             | Not Significant | - | Before |
| Financial resources            |                                                                                               |                 |   |        |
| Pre-diagnosis financial status | Financial stress pre-diagnosis (household ability to make ends meet): Fairly easy (ref: Easy) | Significant     | + | Before |
| Financial resources            |                                                                                               |                 |   |        |
| Pre-diagnosis financial status | Financial stress pre-diagnosis (household ability to make ends meet): Difficult (ref: Easy)   | Significant     | + | Before |
| Financial resources            |                                                                                               |                 |   |        |
| Financial commitment           | Had a mortgage and/or personal loan(s): Yes (ref: No)                                         | Significant     | + | Before |
| Insurance                      |                                                                                               |                 |   |        |
| Health insurance               | Medical card: Held one at diagnosis (ref: No card)                                            | Not Significant | + | Before |



|                                                 |                                                                   |                    |                                |                                                                                                |                 |   |        |
|-------------------------------------------------|-------------------------------------------------------------------|--------------------|--------------------------------|------------------------------------------------------------------------------------------------|-----------------|---|--------|
| Self-developed<br>Not Validated<br>Psychosocial | Feeling about household financial situation as a result of cancer | Poisson regression | Insurance                      | Medical card: Obtained following diagnosis (ref: No Card)                                      | Significant     | + | Before |
|                                                 |                                                                   |                    | Health insurance               |                                                                                                |                 |   |        |
|                                                 |                                                                   |                    | Insurance                      | Private health insurance at diagnosis: Yes (ref: No)                                           | Significant     | - | Before |
|                                                 |                                                                   |                    | Health insurance               |                                                                                                |                 |   |        |
|                                                 |                                                                   |                    | Financial spending             | Direct (cancer related) medical costs: Yes, lowest tertile ( $\leq$ €400) (ref: None reported) | Not Significant | + | During |
|                                                 |                                                                   |                    | Direct medical costs           |                                                                                                |                 |   |        |
|                                                 |                                                                   |                    | Financial spending             | Direct (cancer related) medical costs: Yes, middle tertile (€401–€1100) (ref: None reported)   | Not Significant | + | During |
|                                                 |                                                                   |                    | Direct medical costs           |                                                                                                |                 |   |        |
|                                                 |                                                                   |                    | Financial spending             | Direct (cancer related) medical costs: Yes, highest tertile ( $>$ €1100) (ref: None reported)  | Significant     | + | During |
|                                                 |                                                                   |                    | Direct medical costs           |                                                                                                |                 |   |        |
|                                                 |                                                                   |                    | Financial spending             | Increased household bills: Yes (ref: No)                                                       | Significant     | + | During |
|                                                 |                                                                   |                    | Direct non-medical costs       |                                                                                                |                 |   |        |
|                                                 |                                                                   |                    | Socio-demographic factors      | Dependants: One or more (ref: None)                                                            | Significant     | + | Before |
|                                                 |                                                                   |                    | Familial status                |                                                                                                |                 |   |        |
|                                                 |                                                                   |                    | Employment                     | Employment status at diagnosis: Self-employed (ref: Working for employer)                      | Not Significant | - | Before |
|                                                 |                                                                   |                    | Pre-diagnosis work status      |                                                                                                |                 |   |        |
|                                                 |                                                                   |                    | Employment                     | Employment status at diagnosis: Not working (ref: Working for employer)                        | Significant     | - | Before |
|                                                 |                                                                   |                    | Pre-diagnosis work status      |                                                                                                |                 |   |        |
|                                                 |                                                                   |                    | Employment                     | Employment status at diagnosis: Retired (ref: Working for employer)                            | Significant     | - | Before |
|                                                 |                                                                   |                    | Pre-diagnosis work status      |                                                                                                |                 |   |        |
|                                                 |                                                                   |                    | Financial resources            | Financial stress pre-diagnosis (household ability to make ends meet): Fairly easy (ref: Easy)  | Significant     | + | Before |
|                                                 |                                                                   |                    | Pre-diagnosis financial status |                                                                                                |                 |   |        |

|                          |                                             |                                                                                                           |                                                           |                                |                                                                                                |                 |   |           |        |
|--------------------------|---------------------------------------------|-----------------------------------------------------------------------------------------------------------|-----------------------------------------------------------|--------------------------------|------------------------------------------------------------------------------------------------|-----------------|---|-----------|--------|
|                          |                                             |                                                                                                           |                                                           | Financial resources            | Financial stress pre-diagnosis (household ability to make ends meet): Difficult (ref: Easy)    | Significant     | + | Before    |        |
|                          |                                             |                                                                                                           |                                                           | Pre-diagnosis financial status |                                                                                                |                 |   |           |        |
|                          |                                             |                                                                                                           |                                                           | Insurance                      | Medical card: Held one at diagnosis (ref: No card)                                             | Not Significant | - | Before    |        |
|                          |                                             |                                                                                                           |                                                           | Health insurance               |                                                                                                |                 |   |           |        |
|                          |                                             |                                                                                                           |                                                           | Insurance                      | Medical card: Obtained following diagnosis (ref: No Card)                                      | Significant     | + | Before    |        |
|                          |                                             |                                                                                                           |                                                           | Health insurance               |                                                                                                |                 |   |           |        |
|                          |                                             |                                                                                                           |                                                           | Financial spending             | Direct (cancer related) medical costs: Yes, lowest tertile ( $\leq$ €400) (ref: None reported) | Significant     | - | During    |        |
|                          |                                             |                                                                                                           |                                                           | Direct medical costs           |                                                                                                |                 |   |           |        |
|                          |                                             |                                                                                                           |                                                           | Financial spending             | Direct (cancer related) medical costs: Yes, middle tertile (€401–€1100) (ref: None reported)   | Not Significant | - | During    |        |
|                          |                                             |                                                                                                           |                                                           | Direct medical costs           |                                                                                                |                 |   |           |        |
|                          |                                             |                                                                                                           |                                                           | Financial spending             | Direct (cancer related) medical costs: Yes, highest tertile ( $>$ €1100) (ref: None reported)  | Not Significant | - | During    |        |
|                          |                                             |                                                                                                           |                                                           | Direct medical costs           |                                                                                                |                 |   |           |        |
| Zucca et al. (2011) [30] | EORTC QLQ-C30, Supportive Care Needs Survey | Physical condition or medical treatment caused financial difficulties in the past week                    | Logistic regression                                       | Socio-demographic factors      | Travel for cancer treatment: More than 2 hours (ref: Less than 2 hours)                        | Significant     | + | During    |        |
|                          | Geography                                   |                                                                                                           |                                                           |                                |                                                                                                |                 |   |           |        |
|                          | Material                                    |                                                                                                           |                                                           |                                |                                                                                                |                 |   |           |        |
|                          |                                             |                                                                                                           |                                                           | Socio-demographic factors      | Lived away from home for treatment: Lived away (ref: Did not live away)                        | Significant     | + | During    |        |
|                          |                                             |                                                                                                           |                                                           | Geography                      |                                                                                                |                 |   |           |        |
| Qualitative studies      |                                             |                                                                                                           |                                                           |                                |                                                                                                |                 |   |           |        |
| Amir (2012) [31]         | Interviews                                  | The combined effect of lost income and increased expenditure that is problematic to patients and families | Exploratory qualitative analysis of individual Interviews | Knowledge                      | Lack of awarness for possible financial consequences                                           |                 |   | Promotive | Before |
|                          |                                             |                                                                                                           |                                                           | Knowledge about illness        |                                                                                                |                 |   |           |        |
|                          |                                             |                                                                                                           |                                                           | Knowledge                      | Uncertainty about length of treatment                                                          |                 |   | Promotive | During |
|                          |                                             |                                                                                                           |                                                           | Knowledge about illness        |                                                                                                |                 |   |           |        |

|                                 |                                                                  |            |               |
|---------------------------------|------------------------------------------------------------------|------------|---------------|
| Knowledge                       |                                                                  |            |               |
| Knowledge about illness         | Cancer as chronic disease                                        | Promotive  | During        |
| Knowledge                       |                                                                  |            |               |
| Personal beliefs & attitudes    | Stigma attached to financial hardship                            | Promotive  | Before        |
| Financial resources             |                                                                  |            |               |
| Cancer related financial impact | Cancer related loss of income                                    | Promotive  | During        |
| Employment                      |                                                                  |            |               |
| Pre-diagnosis work status       | Paid employment at time of diagnosis                             | Promotive  | Before        |
| Financial resources             |                                                                  |            |               |
| Financial support               | Subsist on reduced pay or statutory sick pay for lengthy periods | Promotive  | During        |
| Employment                      |                                                                  |            |               |
| Pre-diagnosis work status       | Retired                                                          | Preventive | Before        |
| Financial resources             |                                                                  |            |               |
| Financial commitment            | Financial commitments                                            | Promotive  | Before/During |
| Financial resources             |                                                                  |            |               |
| Financial commitment            | Expenses for dependent children                                  | Promotive  | During        |
| Financial resources             |                                                                  |            |               |
| Financial support               | Financial support for carers                                     | Promotive  | During        |
| Employment                      |                                                                  |            |               |
| Direct implications             | Loss of employment                                               | Promotive  | During        |
| Financial spending              |                                                                  |            |               |
| Direct non-medical costs        | Expenses for hospital travel and parking                         | Promotive  | During        |

|                        |        |                                                                                            |                                                                    |                                       |                                                                                      |            |        |
|------------------------|--------|--------------------------------------------------------------------------------------------|--------------------------------------------------------------------|---------------------------------------|--------------------------------------------------------------------------------------|------------|--------|
|                        |        |                                                                                            |                                                                    | Financial spending                    | Domestic fuel bills                                                                  | Promotive  | During |
|                        |        |                                                                                            |                                                                    | Direct non-medical costs              |                                                                                      |            |        |
|                        |        |                                                                                            |                                                                    | Financial spending                    | Prescription charges                                                                 | Promotive  | During |
|                        |        |                                                                                            |                                                                    | Direct medical costs                  |                                                                                      |            |        |
|                        |        |                                                                                            |                                                                    | Financial spending                    | telephone bills                                                                      | Promotive  | During |
|                        |        |                                                                                            |                                                                    | Direct non-medical costs              |                                                                                      |            |        |
|                        |        |                                                                                            |                                                                    | Insurance                             | Increased insurance premiums                                                         | Promotive  | During |
|                        |        |                                                                                            |                                                                    | Health insurance                      |                                                                                      |            |        |
|                        |        |                                                                                            |                                                                    | Financial spending                    | Healthier Food                                                                       | Promotive  | During |
|                        |        |                                                                                            |                                                                    | Direct non-medical costs              |                                                                                      |            |        |
|                        |        |                                                                                            |                                                                    | Financial spending                    | Nutritional supplements                                                              | Promotive  | During |
|                        |        |                                                                                            |                                                                    | Direct non-medical costs              |                                                                                      |            |        |
|                        |        |                                                                                            |                                                                    | Financial spending                    | Complementary therapies                                                              | Promotive  | During |
|                        |        |                                                                                            |                                                                    | Direct non-medical costs              |                                                                                      |            |        |
|                        |        |                                                                                            |                                                                    | Financial spending                    | wigs, incontinence pads, clothes (because of weight loss/gain), post-mastectomy bras | Promotive  | During |
|                        |        |                                                                                            |                                                                    | Direct medical costs                  |                                                                                      |            |        |
|                        |        |                                                                                            |                                                                    | Financial spending                    | Payments for cleaning, gardening and building work                                   | Promotive  | During |
|                        |        |                                                                                            |                                                                    | Direct non-medical costs              |                                                                                      |            |        |
|                        |        |                                                                                            |                                                                    | Financial spending                    | Less expenses during treatment and ealry recovery due to being debilitated           | Preventive | During |
|                        |        |                                                                                            |                                                                    | Consequences of OOP                   |                                                                                      |            |        |
| Bennett (2009)<br>[32] | Survey | The disruption of work life for a cancer patient undergoing treatment that affects current | Thematic analysis of answers to open ended questions from a survey | Employment<br><br>Direct implications | Loss of income                                                                       | Promotive  | During |

|                            |            |                                                                                                                          |                                               |                                |                                                           |            |        |
|----------------------------|------------|--------------------------------------------------------------------------------------------------------------------------|-----------------------------------------------|--------------------------------|-----------------------------------------------------------|------------|--------|
|                            |            | finances and future prospects for maintaining income                                                                     |                                               | Medical (& treatment) factors  |                                                           |            |        |
|                            |            |                                                                                                                          |                                               | Side effect                    | Physical difficulties due to treatment effects            | Promotive  | During |
|                            |            |                                                                                                                          |                                               | Employment                     |                                                           |            |        |
|                            |            |                                                                                                                          |                                               | Direct implications            | Sick leave                                                | Promotive  | During |
|                            |            |                                                                                                                          |                                               | Employment                     |                                                           |            |        |
|                            |            |                                                                                                                          |                                               | Employer                       | Supportive employers                                      | Preventive | During |
|                            |            |                                                                                                                          |                                               | Insurance                      |                                                           |            |        |
|                            |            |                                                                                                                          |                                               | Social security                | medical government benefit                                | Promotive  | During |
| Fitch et al (2018)<br>[33] | Interviews | Financial costs associated with changes and the emotional upheaval they experienced in coping with the financial burden. | Qualitative analysis of individual Interviews | Employment                     |                                                           |            |        |
|                            |            |                                                                                                                          |                                               | Direct implications            | Reduction of income                                       | Promotive  | During |
|                            |            |                                                                                                                          |                                               |                                |                                                           |            |        |
|                            |            |                                                                                                                          |                                               | Financial spending             |                                                           |            |        |
|                            |            |                                                                                                                          |                                               | Direct medical costs           | Additional expenses related to treatment                  | Promotive  | During |
|                            |            |                                                                                                                          |                                               |                                |                                                           |            |        |
|                            |            |                                                                                                                          |                                               | Employment                     |                                                           |            |        |
|                            |            |                                                                                                                          |                                               | Direct implications            | Patients/caregivers not able to work for a period of time | Promotive  | During |
|                            |            |                                                                                                                          |                                               |                                |                                                           |            |        |
|                            |            |                                                                                                                          |                                               | Financial resources            |                                                           |            |        |
|                            |            |                                                                                                                          |                                               | Pre-diagnosis financial status | Preexisting financial status (ref: poor)                  | Preventive | Before |
|                            |            |                                                                                                                          |                                               | Insurance                      |                                                           |            |        |
|                            |            |                                                                                                                          |                                               | Social security                | Disability coverage (ref: no)                             | Preventive | Before |
|                            |            |                                                                                                                          |                                               |                                |                                                           |            |        |
|                            |            |                                                                                                                          |                                               | Insurance                      |                                                           |            |        |
|                            |            |                                                                                                                          |                                               | Health insurance               | Insurance plans (ref: no)                                 | Preventive | Before |

|                            |        |                                                                                                                                                                                                                                                                     |                                                                      |                            |                                                                |                          |        |
|----------------------------|--------|---------------------------------------------------------------------------------------------------------------------------------------------------------------------------------------------------------------------------------------------------------------------|----------------------------------------------------------------------|----------------------------|----------------------------------------------------------------|--------------------------|--------|
|                            |        |                                                                                                                                                                                                                                                                     |                                                                      | Financial resources        | Ability to manage their finances (ref: not)                    | Preventive               | During |
|                            |        |                                                                                                                                                                                                                                                                     |                                                                      | Coping                     |                                                                |                          |        |
|                            |        |                                                                                                                                                                                                                                                                     |                                                                      | Social circumstances       | Having children in education                                   | Promotive                | Before |
|                            |        |                                                                                                                                                                                                                                                                     |                                                                      | Family                     |                                                                |                          |        |
|                            |        |                                                                                                                                                                                                                                                                     |                                                                      | Social circumstances       | Financial support of family and friends                        | Promotive/<br>Preventive | During |
|                            |        |                                                                                                                                                                                                                                                                     |                                                                      | Family                     |                                                                |                          |        |
|                            |        |                                                                                                                                                                                                                                                                     |                                                                      | Employment                 | Work adjustments (work from home or part time after treatment) | Promotive                | During |
|                            |        |                                                                                                                                                                                                                                                                     |                                                                      | Return to work             |                                                                |                          |        |
|                            |        |                                                                                                                                                                                                                                                                     |                                                                      | Employment                 | Loss of access to benefit plans                                | Promotive                | During |
|                            |        |                                                                                                                                                                                                                                                                     |                                                                      | Employer                   |                                                                |                          |        |
|                            |        |                                                                                                                                                                                                                                                                     |                                                                      | Employment                 | income coverage from employee benefit plans                    | Preventive               | Before |
|                            |        |                                                                                                                                                                                                                                                                     |                                                                      | Employer                   |                                                                |                          |        |
|                            |        |                                                                                                                                                                                                                                                                     |                                                                      | Employment                 | Being self-employed                                            | Promotive                | Before |
|                            |        |                                                                                                                                                                                                                                                                     |                                                                      | Pre-diagnosis work status  |                                                                |                          |        |
|                            |        |                                                                                                                                                                                                                                                                     |                                                                      | Financial resources        | Using savings                                                  | Promotive                | During |
|                            |        |                                                                                                                                                                                                                                                                     |                                                                      | Coping                     |                                                                |                          |        |
| Fitch et al (2020)<br>[34] | Survey | Cancer patient perspectives regarding the impact of financial burden on their daily lives or the kinds of choices individuals make to cope with the situation over time. If their coping mechanisms fail, individuals may experience heightened financial distress. | Qualitative analysis of asnwrs to open ended questions from a survey | Financial spending         | Additional expenses                                            | Promotive                | During |
|                            |        |                                                                                                                                                                                                                                                                     |                                                                      | Cancer-related total costs |                                                                |                          |        |
|                            |        |                                                                                                                                                                                                                                                                     |                                                                      | Financial spending         | Able to manage through various means to cover expenditures     | Preventive               | During |
|                            |        |                                                                                                                                                                                                                                                                     |                                                                      | Consequences of OOP        |                                                                |                          |        |

|                                 |                                                |            |        |
|---------------------------------|------------------------------------------------|------------|--------|
| Insurance                       | Time between travel expenses and reimbursement | Promotive  | During |
| Health insurance                |                                                |            |        |
| Financial resources             | Mortgage                                       | Promotive  | Before |
| Financial commitment            |                                                |            |        |
| Employment                      | Reduced income                                 | Promotive  | During |
| Direct implications             |                                                |            |        |
| Employment                      | Changes in work situation                      | Promotive  | During |
| Direct implications             |                                                |            |        |
| Financial resources             | Reduced reserves                               | Promotive  | During |
| Cancer related financial impact |                                                |            |        |
| Employment                      | Due to side effects not able to work           | Promotive  | During |
| Direct implications             |                                                |            |        |
| Financial resources             | Financial status at the diagnosis              | Promotive  | Before |
| Pre-diagnosis financial status  |                                                |            |        |
| Social circumstances            | Both partners ill at the same time             | Promotive  | During |
| Family                          |                                                |            |        |
| Employment                      | No one able to work                            | Promotive  | During |
| Direct implications             |                                                |            |        |
| Socio-demographic factors       | Having children                                | Promotive  | Before |
| Familial status                 |                                                |            |        |
| Insurance                       | Private health insurance                       | Preventive | Before |
| Health insurance                |                                                |            |        |

|                           |              |                        |                                         |                               |                                |            |        |
|---------------------------|--------------|------------------------|-----------------------------------------|-------------------------------|--------------------------------|------------|--------|
|                           |              |                        |                                         | Employment                    | Employers benefit plan         | Preventive | Before |
|                           |              |                        |                                         | Employer                      |                                |            |        |
|                           |              |                        |                                         | Social circumstances          | Support of family and friends  | Preventive | During |
|                           |              |                        |                                         | Support                       |                                |            |        |
|                           |              |                        |                                         | Employment                    | Caregivers' work benefit plans | Preventive | Before |
|                           |              |                        |                                         | Employer                      |                                |            |        |
| Gray et al (2004)<br>[35] | Focus groups | Concerns about finance | Qualitative analysis<br>of focus groups | Socio-demographic factors     | Living in rural areas          | Promotive  | Before |
|                           |              |                        |                                         | Geography                     |                                |            |        |
|                           |              |                        |                                         | Employment                    | Unemployment                   | Promotive  | During |
|                           |              |                        |                                         | Pre-diagnosis work status     |                                |            |        |
|                           |              |                        |                                         | Insurance                     | Limited assistance             | Promotive  | During |
|                           |              |                        |                                         | Health insurance              |                                |            |        |
|                           |              |                        |                                         | Socio-demographic factors     | Treatment in urban centres     | Promotive  | During |
|                           |              |                        |                                         | Geography                     |                                |            |        |
|                           |              |                        |                                         | Financial spending            | Phone calls                    | Promotive  | During |
|                           |              |                        |                                         | Direct non-medical costs      |                                |            |        |
|                           |              |                        |                                         | Medical (& treatment) factors | Side effect medication         | Promotive  | During |
|                           |              |                        |                                         | Side effect                   |                                |            |        |
|                           |              |                        |                                         | Financial spending            | Prosthetics                    | Promotive  | During |
|                           |              |                        |                                         | Direct medical costs          |                                |            |        |
|                           |              |                        |                                         | Socio-demographic factors     | Having children                | Promotive  | Before |
|                           |              |                        |                                         | Familial status               |                                |            |        |



|                           |            |            |                                                                    |                           |                                                                           |                          |        |
|---------------------------|------------|------------|--------------------------------------------------------------------|---------------------------|---------------------------------------------------------------------------|--------------------------|--------|
| Grinyer (2007)<br>[36]    | Interviews | Not stated | Qualitative analysis<br>of individual<br>Interviews                | Social circumstances      | Returning to family home                                                  | Promotive/<br>Preventive | During |
|                           |            |            |                                                                    | Support                   |                                                                           |                          |        |
|                           |            |            |                                                                    | Socio-demographic factors |                                                                           |                          |        |
|                           |            |            |                                                                    | Age                       | Age                                                                       | Promotive                | Before |
|                           |            |            |                                                                    | Insurance                 |                                                                           |                          |        |
|                           |            |            |                                                                    | Social security           | Benefit system for younger people                                         | Promotive                | Before |
|                           |            |            |                                                                    | Insurance                 |                                                                           |                          |        |
|                           |            |            |                                                                    | Health insurance          | Lack of paid-up contributions                                             | Promotive                | Before |
|                           |            |            |                                                                    | Knowledge                 |                                                                           |                          |        |
|                           |            |            |                                                                    | Access to social benefits | Lack of knowledge and confidence in<br>dealing with a bureaucratic system | Promotive                | Before |
| Kane et al (2020)<br>[37] | Interviews | Not stated | Explorative<br>qualitative analysis<br>of individual<br>Interviews | Employment                |                                                                           |                          |        |
|                           |            |            |                                                                    | Direct implications       | Loss of income                                                            | Promotive                | During |
|                           |            |            |                                                                    | Social circumstances      |                                                                           |                          |        |
|                           |            |            |                                                                    | Family                    | Having a family                                                           | Promotive                | Before |
|                           |            |            |                                                                    | Financial spending        |                                                                           |                          |        |
|                           |            |            |                                                                    | Direct non-medical costs  | Transportation expenses                                                   | Promotive                | During |
|                           |            |            |                                                                    | Financial spending        |                                                                           |                          |        |
|                           |            |            |                                                                    | Direct medical costs      | Expenses for certain medications                                          | Promotive                | During |
|                           |            |            |                                                                    | Financial spending        |                                                                           |                          |        |
|                           |            |            |                                                                    | Direct non-medical costs  | Expenses for childcare                                                    | Promotive                | During |

|                              |            |                                             |                                               |                           |                                                                   |            |        |
|------------------------------|------------|---------------------------------------------|-----------------------------------------------|---------------------------|-------------------------------------------------------------------|------------|--------|
| McGrath et al<br>(1999) [38] | Interviews | Significant worsening of financial position | Qualitative analysis of individual Interviews | Financial spending        | Expenses for home care                                            | Promotive  | During |
|                              |            |                                             |                                               | Direct non-medical costs  |                                                                   |            |        |
|                              |            |                                             |                                               | Financial spending        | Expenses for nutritional or food supplements                      | Promotive  | During |
|                              |            |                                             |                                               | Direct non-medical costs  |                                                                   |            |        |
|                              |            |                                             |                                               | Financial spending        | Expenses for medical supplies                                     | Promotive  | During |
|                              |            |                                             |                                               | Direct medical costs      |                                                                   |            |        |
|                              |            |                                             |                                               | Insurance                 | Disability or health benefits                                     | Preventive | Before |
|                              |            |                                             |                                               | Social security           |                                                                   |            |        |
|                              |            |                                             |                                               | Employment                | Unable to resume their work                                       | Promotive  | During |
|                              |            |                                             |                                               | Direct implications       |                                                                   |            |        |
|                              |            |                                             |                                               | Socio-demographic factors | Living in rural areas                                             | Promotive  | Before |
|                              |            |                                             |                                               | Geography                 |                                                                   |            |        |
|                              |            |                                             |                                               | Financial spending        | Additional costs for medical bills                                | Promotive  | During |
|                              |            |                                             |                                               | Direct medical costs      |                                                                   |            |        |
|                              |            |                                             |                                               | Financial spending        | Fares for travel                                                  | Promotive  | During |
|                              |            |                                             |                                               | Direct non-medical costs  |                                                                   |            |        |
|                              |            |                                             |                                               | Financial spending        | Incidental expenses                                               | Promotive  | During |
|                              |            |                                             |                                               | Direct non-medical costs  |                                                                   |            |        |
|                              |            |                                             |                                               | Financial spending        | Cost involved in making arrangements for absence during treatment | Promotive  | During |
|                              |            |                                             |                                               | Direct non-medical costs  |                                                                   |            |        |
|                              |            |                                             |                                               | Financial spending        | Paying for tests                                                  | Promotive  | During |
|                              |            |                                             |                                               | Direct medical costs      |                                                                   |            |        |

|                        |            |                              |                                                                                            |                           |                                         |           |        |
|------------------------|------------|------------------------------|--------------------------------------------------------------------------------------------|---------------------------|-----------------------------------------|-----------|--------|
|                        |            |                              |                                                                                            | Financial spending        | Covering alternative therapies          | Promotive | During |
|                        |            |                              |                                                                                            | Direct non-medical costs  |                                         |           |        |
|                        |            |                              |                                                                                            | Financial spending        | Wigs and prostheses                     | Promotive | During |
|                        |            |                              |                                                                                            | Direct medical costs      |                                         |           |        |
|                        |            |                              |                                                                                            | Financial spending        | Costs for doctors in the rural areas    | Promotive | Before |
|                        |            |                              |                                                                                            | Direct medical costs      |                                         |           |        |
|                        |            |                              |                                                                                            | Financial spending        | Costs of STD telephone calls            | Promotive | During |
|                        |            |                              |                                                                                            | Direct non-medical costs  |                                         |           |        |
|                        |            |                              |                                                                                            | Financial spending        | Travel to medical treatment             | Promotive | During |
|                        |            |                              |                                                                                            | Direct non-medical costs  |                                         |           |        |
|                        |            |                              |                                                                                            | Social circumstances      | Major financially breadwinner of family | Promotive | Before |
|                        |            |                              |                                                                                            | Financial role            |                                         |           |        |
|                        |            |                              |                                                                                            | Employment                | Self-employed                           | Promotive | Before |
|                        |            |                              |                                                                                            | Pre-diagnosis work status |                                         |           |        |
|                        |            |                              |                                                                                            | Financial resources       | Having property                         | Promotive | Before |
|                        |            |                              |                                                                                            | Financial commitment      |                                         |           |        |
| McGrath (2000)<br>[39] | Interviews | financial impact on families | Qualitative analysis<br>of individual<br>Interviews with<br>patients and their<br>families | Financial spending        | Increased cost of shopping              | Promotive | During |
|                        |            |                              |                                                                                            | Direct non-medical costs  |                                         |           |        |
|                        |            |                              |                                                                                            | Financial spending        | Telephone calls                         | Promotive | During |
|                        |            |                              |                                                                                            | Direct non-medical costs  |                                         |           |        |

|                               |                                                                          |            |        |
|-------------------------------|--------------------------------------------------------------------------|------------|--------|
| Social circumstances          | Loss of support of local voluntary organisation                          | Promotive  | During |
| Support                       |                                                                          |            |        |
| Financial spending            | Additional medical costs                                                 | Promotive  | During |
| Direct medical costs          |                                                                          |            |        |
| Financial spending            | Accommodation costs                                                      | Promotive  | During |
| Direct non-medical costs      |                                                                          |            |        |
| Financial spending            | Cost of maintaining home in absence after pets etc in caretakers absence | Promotive  | During |
| Direct non-medical costs      |                                                                          |            |        |
| Financial spending            | Incidental costs                                                         | Promotive  | During |
| Direct non-medical costs      |                                                                          |            |        |
| Medical (& treatment) factors | (Free) Accommodation at Leukaemia Foundation of Queensland's Centres     | Preventive | During |
| Treatment                     |                                                                          |            |        |
| Employment                    | Employer support                                                         | Preventive | During |
| Employer                      |                                                                          |            |        |
| Social circumstances          | "Bread winner" not affected                                              | Preventive | Before |
| Financial role                |                                                                          |            |        |
| Financial resources           | Credit Cards                                                             | Preventive | During |
| Coping                        |                                                                          |            |        |
| Insurance                     | Prescribed drugs of PBS                                                  | Preventive | During |
| Health insurance              |                                                                          |            |        |
| Employment                    | Part-time income                                                         | Preventive | During |
| Pre-diagnosis work status     |                                                                          |            |        |

|                              |            |                                                                                     |                                                     |                                 |                                       |            |        |
|------------------------------|------------|-------------------------------------------------------------------------------------|-----------------------------------------------------|---------------------------------|---------------------------------------|------------|--------|
|                              |            |                                                                                     |                                                     | Financial resources             | ‘Nest-egg’ available                  | Preventive | Before |
|                              |            |                                                                                     |                                                     | Pre-diagnosis financial status  |                                       |            |        |
|                              |            |                                                                                     |                                                     | Financial resources             | Home owner                            | Preventive | Before |
|                              |            |                                                                                     |                                                     | Financial commitment            |                                       |            |        |
|                              |            |                                                                                     |                                                     | Financial resources             | Income insurance                      | Preventive | Before |
|                              |            |                                                                                     |                                                     | Financial support               |                                       |            |        |
|                              |            |                                                                                     |                                                     | Financial resources             | Threat of selling family home         | Promotive  | During |
|                              |            |                                                                                     |                                                     | Financial commitment            |                                       |            |        |
|                              |            |                                                                                     |                                                     | Financial resources             | Home and car re-payments              | Promotive  | During |
|                              |            |                                                                                     |                                                     | Financial commitment            |                                       |            |        |
|                              |            |                                                                                     |                                                     | Financial resources             | Erode ‘buffer zone’                   | Promotive  | During |
|                              |            |                                                                                     |                                                     | Cancer related financial impact |                                       |            |        |
|                              |            |                                                                                     |                                                     | Financial resources             | No savings to start with              | Promotive  | Before |
|                              |            |                                                                                     |                                                     | Pre-diagnosis financial status  |                                       |            |        |
|                              |            |                                                                                     |                                                     | Financial resources             | Long-term on social security benefits | Promotive  | During |
|                              |            |                                                                                     |                                                     | Financial support               |                                       |            |        |
|                              |            |                                                                                     |                                                     | Financial resources             | Credit cards                          | Promotive  | During |
|                              |            |                                                                                     |                                                     | Cancer related financial impact |                                       |            |        |
|                              |            |                                                                                     |                                                     | Employment                      | Self-employed                         | Promotive  | Before |
|                              |            |                                                                                     |                                                     | Pre-diagnosis work status       |                                       |            |        |
| Moffatt et al<br>(2010) [40] | Interviews | Difficulties affording the additional<br>resources required to cope with<br>illness | Qualitative analysis<br>of individual<br>Interviews | Financial resources             | Working partner earns a high income   | Preventive | Before |
|                              |            |                                                                                     |                                                     | Pre-diagnosis financial status  |                                       |            |        |

|                            |                                                               |            |        |
|----------------------------|---------------------------------------------------------------|------------|--------|
| Insurance                  |                                                               |            |        |
| Health insurance           | Well covered by private health insurance                      | Preventive | Before |
| Financial resources        |                                                               |            |        |
| Financial support          | Well covered by mortgage protection                           | Preventive | Before |
| Employment                 |                                                               |            |        |
| Pre-diagnosis work status  | Better payed job                                              | Preventive | Before |
| Employment                 |                                                               |            |        |
| Employer                   | Working in the public sector                                  | Preventive | Before |
| Employment                 |                                                               |            |        |
| Employer                   | Not qualifying for occupational sick benefits                 | Promotive  | Before |
| Insurance                  |                                                               |            |        |
| Social security            | Relying on Statutory Sick Pay or Employment Support Allowance | Promotive  | Before |
| Employment                 |                                                               |            |        |
| Direct implications        | Considerable drop in household income                         | Promotive  | During |
| Financial spending         |                                                               |            |        |
| Cancer-related total costs | Significant additional expenditure                            | Promotive  | During |
| Knowledge                  |                                                               |            |        |
| Getting assistance         | Assistance from welfare rights advisors                       | Preventive | During |
| Social circumstances       |                                                               |            |        |
| Family                     | Having young children at home                                 | Promotive  | Before |
| Social circumstances       |                                                               |            |        |
| Financial role             | Being the 'main' earner                                       | Promotive  | Before |

|                           |                                                                                                                                                           |            |        |
|---------------------------|-----------------------------------------------------------------------------------------------------------------------------------------------------------|------------|--------|
| Employment                | Self-employed without illness insurance                                                                                                                   | Promotive  | Before |
| Pre-diagnosis work status |                                                                                                                                                           |            |        |
| Financial spending        | Petrol and parking costs for hospital visits                                                                                                              | Promotive  | During |
| Direct non-medical costs  |                                                                                                                                                           |            |        |
| Financial spending        | Additional heating costs                                                                                                                                  | Promotive  | During |
| Direct non-medical costs  |                                                                                                                                                           |            |        |
| Financial spending        | Dietary needs                                                                                                                                             | Promotive  | During |
| Direct non-medical costs  |                                                                                                                                                           |            |        |
| Financial spending        | Clothing needs                                                                                                                                            | Promotive  | During |
| Direct non-medical costs  |                                                                                                                                                           |            |        |
| Financial spending        | Buying cheaper brands of food                                                                                                                             | Promotive  | During |
| Consequences of OOP       |                                                                                                                                                           |            |        |
| Financial spending        | Economising on other household bills                                                                                                                      | Promotive  | During |
| Consequences of OOP       |                                                                                                                                                           |            |        |
| Social circumstances      | Reducing social activities                                                                                                                                | Promotive  | During |
| Social activities         |                                                                                                                                                           |            |        |
| Social circumstances      | Reducing leisure activities                                                                                                                               | Promotive  | During |
| Social activities         |                                                                                                                                                           |            |        |
| Social circumstances      | Borrowing cash from other family members                                                                                                                  | Preventive | During |
| Support                   |                                                                                                                                                           |            |        |
| Social circumstances      | Continuing with activities such as sports and music that usually involved some expense (trying to maintain a sense of normality and routine for children) | Promotive  | During |
| Social activities         |                                                                                                                                                           |            |        |

|                           |            |                                                                                                                                                |                                               |                              |                                                                                                                         |            |        |
|---------------------------|------------|------------------------------------------------------------------------------------------------------------------------------------------------|-----------------------------------------------|------------------------------|-------------------------------------------------------------------------------------------------------------------------|------------|--------|
|                           |            |                                                                                                                                                |                                               | Knowledge                    |                                                                                                                         |            |        |
|                           |            |                                                                                                                                                |                                               | Access to social benefits    | Lack of knowledge about available benefits                                                                              | Promotive  | During |
|                           |            |                                                                                                                                                |                                               | Knowledge                    |                                                                                                                         |            |        |
|                           |            |                                                                                                                                                |                                               | Getting assistance           | Help from welfare rights advisers                                                                                       | Preventive | During |
|                           |            |                                                                                                                                                |                                               | Knowledge                    |                                                                                                                         |            |        |
|                           |            |                                                                                                                                                |                                               | Personal beliefs & attitudes | Attitudinal factors that influenced their propensity to claim (e.g. values of hard work, 'making do' and self reliance) | Promotive  | Before |
|                           |            |                                                                                                                                                |                                               | Knowledge                    |                                                                                                                         |            |        |
|                           |            |                                                                                                                                                |                                               | Personal beliefs & attitudes | Beliefs about the extent and severity of illness                                                                        | Promotive  | During |
| Moffatt et al (2012) [41] | Interviews | The financial difficulties experienced due to a temporary or permanent loss of earnings as well as the additional costs associated with cancer | Qualitative analysis of individual Interviews | Knowledge                    |                                                                                                                         |            |        |
|                           |            |                                                                                                                                                |                                               | Employment                   |                                                                                                                         |            |        |
|                           |            |                                                                                                                                                |                                               | Direct implications          | Lost earnings as a result of temporary or permanent cessation of work                                                   | Promotive  | During |
|                           |            |                                                                                                                                                |                                               | Knowledge                    |                                                                                                                         |            |        |
|                           |            |                                                                                                                                                |                                               | Getting assistance           | Assistance applying for and receive illness and incapacity benefits                                                     | Promotive  | During |
|                           |            |                                                                                                                                                |                                               | Financial spending           |                                                                                                                         |            |        |
|                           |            |                                                                                                                                                |                                               | Direct non-medical costs     | Travel and parking                                                                                                      | Promotive  | During |
|                           |            |                                                                                                                                                |                                               | Financial spending           |                                                                                                                         |            |        |
|                           |            |                                                                                                                                                |                                               | Direct non-medical costs     | Dietary requirements                                                                                                    | Promotive  | During |
|                           |            |                                                                                                                                                |                                               | Financial spending           |                                                                                                                         |            |        |
|                           |            |                                                                                                                                                |                                               | Direct non-medical costs     | Heating and clothing costs                                                                                              | Promotive  | During |



|                           |            |                                                                                                                                                |                                                            |                               |                                                                                                                                                                                                                                         |           |        |
|---------------------------|------------|------------------------------------------------------------------------------------------------------------------------------------------------|------------------------------------------------------------|-------------------------------|-----------------------------------------------------------------------------------------------------------------------------------------------------------------------------------------------------------------------------------------|-----------|--------|
|                           |            |                                                                                                                                                |                                                            | Financial spending            | Adaptations to the home                                                                                                                                                                                                                 | Promotive | During |
|                           |            |                                                                                                                                                |                                                            | Direct non-medical costs      |                                                                                                                                                                                                                                         |           |        |
|                           |            |                                                                                                                                                |                                                            | Financial spending            | Paying for extra help                                                                                                                                                                                                                   | Promotive | During |
|                           |            |                                                                                                                                                |                                                            | Direct non-medical costs      |                                                                                                                                                                                                                                         |           |        |
|                           |            |                                                                                                                                                |                                                            | Knowledge                     | Lack of knowledge about available benefits and eligibility criteria                                                                                                                                                                     | Promotive | During |
|                           |            |                                                                                                                                                |                                                            | Access to social benefits     |                                                                                                                                                                                                                                         |           |        |
|                           |            |                                                                                                                                                |                                                            | Knowledge                     | Negative attitudes towards claiming benefits                                                                                                                                                                                            | Promotive | Before |
|                           |            |                                                                                                                                                |                                                            | Personal beliefs & attitudes  |                                                                                                                                                                                                                                         |           |        |
|                           |            |                                                                                                                                                |                                                            | Knowledge                     | Unpleasant dealings with the benefits system in the past                                                                                                                                                                                | Promotive | Before |
|                           |            |                                                                                                                                                |                                                            | Personal beliefs & attitudes  |                                                                                                                                                                                                                                         |           |        |
|                           |            |                                                                                                                                                |                                                            | Knowledge                     | Professionals who did not alert patients to benefit entitlements                                                                                                                                                                        | Promotive | During |
|                           |            |                                                                                                                                                |                                                            | Getting assistance            |                                                                                                                                                                                                                                         |           |        |
|                           |            |                                                                                                                                                |                                                            | Knowledge                     | Benefits system is time consuming and complex                                                                                                                                                                                           | Promotive | Before |
|                           |            |                                                                                                                                                |                                                            | Access to social benefits     |                                                                                                                                                                                                                                         |           |        |
|                           |            |                                                                                                                                                |                                                            | Medical (& treatment) factors | Participant accounts of fatigue, pain, nausea or inability to concentrate deterred individuals from the lengthy and complex process of establishing eligibility criteria and completing lengthy benefit applications without assistance | Promotive | During |
|                           |            |                                                                                                                                                |                                                            | Side effect                   |                                                                                                                                                                                                                                         |           |        |
|                           |            |                                                                                                                                                |                                                            | Knowledge                     | Time between diagnosis and receipt of advice                                                                                                                                                                                            | Promotive | During |
|                           |            |                                                                                                                                                |                                                            | Getting assistance            |                                                                                                                                                                                                                                         |           |        |
| Moffatt et al (2015) [42] | Interviews | The financial difficulties experienced due to a temporary or permanent loss of earnings as well as the additional costs associated with cancer | Qualitative longitudinal analysis of individual Interviews | Employment                    | Drop in income                                                                                                                                                                                                                          | Promotive | During |
|                           |            |                                                                                                                                                |                                                            | Direct implications           |                                                                                                                                                                                                                                         |           |        |

|                                 |                                                                                   |                          |        |
|---------------------------------|-----------------------------------------------------------------------------------|--------------------------|--------|
| Employment                      | Type of job                                                                       | Promotive/<br>Preventive | Before |
| Pre-diagnosis work status       |                                                                                   |                          |        |
| Employment                      | Eligibility for occupational sickness<br>protection                               | Preventive               | Before |
| Employer                        |                                                                                   |                          |        |
| Employment                      | High paid job                                                                     | Preventive               | Before |
| Pre-diagnosis work status       |                                                                                   |                          |        |
| Employment                      | White-collar public sector employment                                             | Preventive               | Before |
| Pre-diagnosis work status       |                                                                                   |                          |        |
| Financial resources             | Affect of ability to meet bills, housing<br>payments and other bills              | Promotive                | During |
| Cancer related financial impact |                                                                                   |                          |        |
| Financial spending              | Economising on household expenditure                                              | Promotive                | During |
| Consequences of OOP             |                                                                                   |                          |        |
| Financial resources             | Borrowing cash                                                                    | Promotive                | During |
| Coping                          |                                                                                   |                          |        |
| Social circumstances            | Relying on others for transport to hospital                                       | Promotive                | During |
| Support                         |                                                                                   |                          |        |
| Financial resources             | Using up savings                                                                  | Promotive                | During |
| Coping                          |                                                                                   |                          |        |
| Financial resources             | Accruing debt                                                                     | Promotive                | During |
| Coping                          |                                                                                   |                          |        |
| Social circumstances            | Carers/partners reducing working hours to<br>support and spend time with patients | Promotive                | During |
| Family                          | (further reducing household income)                                               |                          |        |

|                            |            |                                                                                        |                                                    |                           |                                                                                                    |                       |        |
|----------------------------|------------|----------------------------------------------------------------------------------------|----------------------------------------------------|---------------------------|----------------------------------------------------------------------------------------------------|-----------------------|--------|
|                            |            |                                                                                        |                                                    | Social circumstances      | Carers/partners reluctantly increasing their [work] hours in an attempt to offset lost income      | Promotive             | During |
|                            |            |                                                                                        |                                                    | Support                   |                                                                                                    |                       |        |
|                            |            |                                                                                        |                                                    | Employment                | Cancer related financial impact of treatment on ability to work                                    | Promotive/ Preventive | During |
|                            |            |                                                                                        |                                                    | Direct implications       |                                                                                                    |                       |        |
|                            |            |                                                                                        |                                                    | Employment                | Self-employment                                                                                    | Promotive             | Before |
|                            |            |                                                                                        |                                                    | Pre-diagnosis work status |                                                                                                    |                       |        |
| Schröder et al (2020) [43] | Interviews | The social impact of cancer, particularly on employment and its financial consequences | Qualitative analysis of semi-structured interviews | Financial spending        | Accommodation (delaying rent or postponing maintenance of a residential property)                  | Promotive             | Before |
|                            |            |                                                                                        |                                                    | Consequences of OOP       |                                                                                                    |                       |        |
|                            |            |                                                                                        |                                                    | Financial spending        | Food (buying food on sale or cooking inexpensive dishes)                                           | Promotive             | During |
|                            |            |                                                                                        |                                                    | Consequences of OOP       |                                                                                                    |                       |        |
|                            |            |                                                                                        |                                                    | Financial spending        | Utility costs (reducing energy, water consumption)                                                 | Promotive             | During |
|                            |            |                                                                                        |                                                    | Consequences of OOP       |                                                                                                    |                       |        |
|                            |            |                                                                                        |                                                    | Financial spending        | Transportation (postponing maintenance of a car, selling a car, or foregoing purchasing a new car) | Promotive             | During |
|                            |            |                                                                                        |                                                    | Consequences of OOP       |                                                                                                    |                       |        |
|                            |            |                                                                                        |                                                    | Financial spending        | Clothing (being unable to buy new clothes for children or buying second-hand clothes)              | Promotive             | During |
|                            |            |                                                                                        |                                                    | Consequences of OOP       |                                                                                                    |                       |        |
|                            |            |                                                                                        |                                                    | Financial spending        | Delaying major purchases                                                                           | Promotive             | During |
|                            |            |                                                                                        |                                                    | Consequences of OOP       |                                                                                                    |                       |        |
|                            |            |                                                                                        |                                                    | Financial spending        | Holidays (forego or choose less expensive options)                                                 | Promotive             | During |
|                            |            |                                                                                        |                                                    | Consequences of OOP       |                                                                                                    |                       |        |
|                            |            |                                                                                        |                                                    | Financial spending        | Reducing hobbies, social contacts, and leisure activities                                          | Promotive             | During |
|                            |            |                                                                                        |                                                    | Consequences of OOP       |                                                                                                    |                       |        |

|                                 |                                                   |           |        |
|---------------------------------|---------------------------------------------------|-----------|--------|
| Financial spending              | Preventive new purchases                          | Promotive | During |
| Consequences of OOP             |                                                   |           |        |
| Financial spending              | Forego transport service due to high OOP payments | Promotive | During |
| Consequences of OOP             |                                                   |           |        |
| Financial spending              | Forego medical remedies due to high OOP payments  | Promotive | During |
| Consequences of OOP             |                                                   |           |        |
| Insurance                       | Private health insurance                          | Promotive | During |
| Health insurance                |                                                   |           |        |
| Financial resources             | General                                           | Promotive | During |
| Cancer related financial impact |                                                   |           |        |
| Financial resources             | Pension savings                                   | Promotive | During |
| Coping                          |                                                   |           |        |
| Financial resources             | Using savings                                     | Promotive | During |
| Coping                          |                                                   |           |        |
| Employment                      | Returned to work quickly                          | Promotive | During |
| Return to work                  |                                                   |           |        |
| Employment                      | Marginal employment                               | Promotive | During |
| Return to work                  |                                                   |           |        |
| Social circumstances            | Family and friends                                | Promotive | During |
| Support                         |                                                   |           |        |
| Insurance                       | Institutional support                             | Promotive | During |
| Social security                 |                                                   |           |        |

|                                    |        |                                                                        |                                                         |                               |                                                              |                       |        |
|------------------------------------|--------|------------------------------------------------------------------------|---------------------------------------------------------|-------------------------------|--------------------------------------------------------------|-----------------------|--------|
|                                    |        |                                                                        |                                                         | Financial resources           | Incurring bank debts                                         | Promotive             | During |
|                                    |        |                                                                        |                                                         | Coping                        |                                                              |                       |        |
|                                    |        |                                                                        |                                                         | Medical (& treatment) factors | Making health-related decisions                              | Promotive             | During |
|                                    |        |                                                                        |                                                         | Treatment                     |                                                              |                       |        |
| Slavova-Azmanova et al (2020) [44] | Survey | Costs associated with cancer treatment and how they affected ones life | Qualitative analysis of answers to open-ended questions | Insurance                     |                                                              | Promotive/ Preventive | During |
|                                    |        |                                                                        |                                                         | Health insurance              |                                                              |                       |        |
|                                    |        |                                                                        |                                                         | Employment                    | Pensioners                                                   | Promotive/ Preventive | Before |
|                                    |        |                                                                        |                                                         | Pre-diagnosis work status     |                                                              |                       |        |
|                                    |        |                                                                        |                                                         | Employment                    | Leave available                                              | Preventive            | Before |
|                                    |        |                                                                        |                                                         | Employer                      |                                                              |                       |        |
|                                    |        |                                                                        |                                                         | Employment                    | Consequences on participants' employment and ability to work | Promotive             | During |
|                                    |        |                                                                        |                                                         | Direct implications           |                                                              |                       |        |
|                                    |        |                                                                        |                                                         | Employment                    | Consequences on partner's income and employment              | Promotive             | During |
|                                    |        |                                                                        |                                                         | Direct implications           |                                                              |                       |        |
|                                    |        |                                                                        |                                                         | Financial resources           | Savings, superannuation, credit cards, borrow from family    | Promotive             | During |
|                                    |        |                                                                        |                                                         | Coping                        |                                                              |                       |        |
|                                    |        |                                                                        |                                                         | Financial resources           | Insurances - trauma, life, income protection                 | Preventive            | Before |
|                                    |        |                                                                        |                                                         | Financial support             |                                                              |                       |        |
|                                    |        |                                                                        |                                                         | Financial resources           | CentreLink assistance                                        | Promotive             | During |
|                                    |        |                                                                        |                                                         | Financial support             |                                                              |                       |        |
|                                    |        |                                                                        |                                                         | Insurance                     | PATS                                                         | Promotive/ Preventive | During |
|                                    |        |                                                                        |                                                         | Health insurance              |                                                              |                       |        |

|                               |            |                      |                                                     |                      |                                                                                        |                          |        |
|-------------------------------|------------|----------------------|-----------------------------------------------------|----------------------|----------------------------------------------------------------------------------------|--------------------------|--------|
|                               |            |                      |                                                     | Insurance            | Concession cards                                                                       | Preventive               | Before |
|                               |            |                      |                                                     | Health insurance     |                                                                                        |                          |        |
|                               |            |                      |                                                     | Social circumstances | Community and NGOs' support                                                            | Preventive               | During |
|                               |            |                      |                                                     | Support              |                                                                                        |                          |        |
|                               |            |                      |                                                     | Social circumstances | Family support                                                                         | Promotive/<br>Preventive | During |
|                               |            |                      |                                                     | Support              |                                                                                        |                          |        |
|                               |            |                      |                                                     | Knowledge            | Unknown expenses, not knowing where<br>treatment may be available and waiting<br>times | Promotive                | During |
|                               |            |                      |                                                     | Access to healthcare |                                                                                        |                          |        |
|                               |            |                      |                                                     | Knowledge            | Looking up for different providers                                                     | Promotive                | During |
|                               |            |                      |                                                     | Access to healthcare |                                                                                        |                          |        |
|                               |            |                      |                                                     | Knowledge            | Knowing how to navigate the health care<br>system                                      | Promotive                | Before |
|                               |            |                      |                                                     | Access to healthcare |                                                                                        |                          |        |
| Timmons et al<br>(2013a) [45] | Interviews | All facets of burden | Qualitative analysis<br>of individual<br>interviews | Financial spending   | Hospital bills                                                                         | Promotive                | During |
|                               |            |                      |                                                     | Direct medical costs |                                                                                        |                          |        |
|                               |            |                      |                                                     | Financial spending   | Consultant visits                                                                      | Promotive                | During |
|                               |            |                      |                                                     | Direct medical costs |                                                                                        |                          |        |
|                               |            |                      |                                                     | Financial spending   | Primary care physician visits                                                          | Promotive                | During |
|                               |            |                      |                                                     | Direct medical costs |                                                                                        |                          |        |
|                               |            |                      |                                                     | Financial spending   | Procedures                                                                             | Promotive                | During |
|                               |            |                      |                                                     | Direct medical costs |                                                                                        |                          |        |
|                               |            |                      |                                                     | Financial spending   | Prescription medications                                                               | Promotive                | During |
|                               |            |                      |                                                     | Direct medical costs |                                                                                        |                          |        |

|                          |                                                |           |        |
|--------------------------|------------------------------------------------|-----------|--------|
| Financial spending       | Convalescence after surgery                    | Promotive | During |
| Direct medical costs     |                                                |           |        |
| Financial spending       | Counselling                                    | Promotive | During |
| Direct medical costs     |                                                |           |        |
| Financial spending       | Manual lymph drainage                          | Promotive | During |
| Direct medical costs     |                                                |           |        |
| Financial spending       | Wigs/bandanas/night caps                       | Promotive | During |
| Direct medical costs     |                                                |           |        |
| Financial spending       | Prothesis bras/related items                   | Promotive | During |
| Direct medical costs     |                                                |           |        |
| Financial spending       | Over-the-counter medications                   | Promotive | During |
| Direct medical costs     |                                                |           |        |
| Financial spending       | New clothes/second-hand clothes                | Promotive | During |
| Direct non-medical costs |                                                |           |        |
| Financial spending       | Transport                                      | Promotive | During |
| Direct non-medical costs |                                                |           |        |
| Financial spending       | Hospital parking                               | Promotive | During |
| Direct non-medical costs |                                                |           |        |
| Financial spending       | Meals (when attending hospital)                | Promotive | During |
| Direct non-medical costs |                                                |           |        |
| Financial spending       | Overnight accomodation (when having treatment) | Promotive | During |
| Direct non-medical costs |                                                |           |        |

|                          |                                                                                 |                          |        |
|--------------------------|---------------------------------------------------------------------------------|--------------------------|--------|
| Financial spending       | Childcare costs (babysitting or crèche; when attending hospital)                | Promotive                | During |
| Direct non-medical costs |                                                                                 |                          |        |
| Financial spending       | Heating bills                                                                   | Promotive                | During |
| Direct non-medical costs |                                                                                 |                          |        |
| Financial spending       | Telephone bills                                                                 | Promotive                | During |
| Direct non-medical costs |                                                                                 |                          |        |
| Financial spending       | Homecare                                                                        | Promotive                | During |
| Direct non-medical costs |                                                                                 |                          |        |
| Financial spending       | Healthy eating                                                                  | Promotive                | During |
| Direct non-medical costs |                                                                                 |                          |        |
| Financial spending       | House modifications                                                             | Promotive                | During |
| Direct non-medical costs |                                                                                 |                          |        |
| Employment               | Workplace participation post-diagnosis                                          | Promotive/<br>Preventive | During |
| Direct implications      |                                                                                 |                          |        |
| Employment               | Factors influencing whether cancer patients work during treatment               | Promotive/<br>Preventive | During |
| Direct implications      |                                                                                 |                          |        |
| Employment               | Cancer related financial impact of cancer on employment of other family members | Promotive/<br>Preventive | During |
| Direct implications      |                                                                                 |                          |        |
| Employment               | Factors influencing time-off work for other family members                      | Promotive/<br>Preventive | During |
| Direct implications      |                                                                                 |                          |        |
| Employment               | Factors influencing change in income                                            | Promotive/<br>Preventive | During |
| Direct implications      |                                                                                 |                          |        |



|                            |           |                                                                          |                                               |                                |                                                     |                       |        |
|----------------------------|-----------|--------------------------------------------------------------------------|-----------------------------------------------|--------------------------------|-----------------------------------------------------|-----------------------|--------|
|                            |           |                                                                          |                                               | Employment                     | Cancer related financial impact of change in income | Promotive/ Preventive | During |
|                            |           |                                                                          |                                               | Direct implications            |                                                     |                       |        |
|                            |           |                                                                          |                                               | Employment                     | Factors influencing return to work                  | Promotive/ Preventive | After  |
|                            |           |                                                                          |                                               | Return to work                 |                                                     |                       |        |
| Timmons et al (2013b) [46] | Interview | Experiencing “extra costs” or “financial difficulties” because of cancer | Qualitative analysis of individual interviews | Employment                     | Working at diagnosis                                | Promotive             | Before |
|                            |           |                                                                          |                                               | Pre-diagnosis work status      |                                                     |                       |        |
|                            |           |                                                                          |                                               | Socio-demographic factors      | Having young children                               | Promotive             | Before |
|                            |           |                                                                          |                                               | Familial status                |                                                     |                       |        |
|                            |           |                                                                          |                                               | Socio-demographic factors      | Being a lone parent                                 | Promotive             | Before |
|                            |           |                                                                          |                                               | Familial status                |                                                     |                       |        |
|                            |           |                                                                          |                                               | Socio-demographic factors      | Being younger                                       | Promotive             | Before |
|                            |           |                                                                          |                                               | Age                            |                                                     |                       |        |
|                            |           |                                                                          |                                               | Insurance                      | Not having a medical card                           | Promotive             | Before |
|                            |           |                                                                          |                                               | Health insurance               |                                                     |                       |        |
|                            |           |                                                                          |                                               | Financial resources            | Low income pre-diagnosis                            | Promotive             | Before |
|                            |           |                                                                          |                                               | Pre-diagnosis financial status |                                                     |                       |        |
|                            |           |                                                                          |                                               | Financial resources            | Receiving social welfare benefits                   | Promotive             | Before |
|                            |           |                                                                          |                                               | Financial support              |                                                     |                       |        |
|                            |           |                                                                          |                                               | Financial resources            | Having no/few savings                               | Promotive             | Before |
|                            |           |                                                                          |                                               | Pre-diagnosis financial status |                                                     |                       |        |

|                                |                                                                                              |            |        |
|--------------------------------|----------------------------------------------------------------------------------------------|------------|--------|
| Financial resources            | Having a mortgage                                                                            | Promotive  | Before |
| Financial commitment           |                                                                                              |            |        |
| Socio-demographic factors      | Living in remote/rural areas                                                                 | Promotive  | Before |
| Geography                      |                                                                                              |            |        |
| Insurance                      | Ineligible for social welfare benefits (e.g. self-employed, foreign nationals, farmers)      | Promotive  | Before |
| Social security                |                                                                                              |            |        |
| Socio-demographic factors      | Living alone                                                                                 | Promotive  | Before |
| Familial status                |                                                                                              |            |        |
| Socio-demographic factors      | Being elderly                                                                                | Promotive  | Before |
| Age                            |                                                                                              |            |        |
| Social circumstances           | Socially isolated, lack of family/social support                                             | Promotive  | During |
| Family                         |                                                                                              |            |        |
| Medical (& treatment) factors  | Receiving inpatient treatment                                                                | Preventive | During |
| Treatment                      |                                                                                              |            |        |
| Medical (& treatment) factors  | Access to hospital accommodation (e.g. during radiotherapy)                                  | Preventive | During |
| Treatment                      |                                                                                              |            |        |
| Social circumstances           | Supportive family and friends able to provide financial or practical help                    | Preventive | During |
| Support                        |                                                                                              |            |        |
| Financial resources            | Receiving full sick pay                                                                      | Preventive | During |
| Financial support              |                                                                                              |            |        |
| Financial resources            | Having other financial resources (e.g. savings, private health insurance, illness insurance) | Preventive | Before |
| Pre-diagnosis financial status |                                                                                              |            |        |

## References

1. Akechi, T.; Okuyama, T.; Uchida, M.; Nakaguchi, T.; Ito, Y.; Yamashita, H.; Toyama, T.; Komatsu, H.; Kizawa, Y.; Wada, M. Perceived needs, psychological distress and quality of life of elderly cancer patients. *Jpn. J. Clin. Oncol.* **2012**, *42*, 704–710, doi:10.1093/jjco/hys075.
2. Arndt, V.; Merx, H.; Stegmaier, C.; Ziegler, H.; Brenner, H. Quality of life in patients with colorectal cancer 1 year after diagnosis compared with the general population: a population-based study. *J. Clin. Oncol.* **2004**, *22*, 4829–4836, doi:10.1200/JCO.2004.02.018.
3. Arndt, V.; Koch-Gallenkamp, L.; Jansen, L.; Bertram, H.; Eberle, A.; Holleczeck, B.; Schmid-Höpfner, S.; Waldmann, A.; Zeissig, S.R.; Brenner, H. Quality of life in long-term and very long-term cancer survivors versus population controls in Germany. *Acta Oncol.* **2017**, *56*, 190–197, doi:10.1080/0284186X.2016.1266089.
4. Arndt, V.; Koch-Gallenkamp, L.; Bertram, H.; Eberle, A.; Holleczeck, B.; Pritzkeleit, R.; Waldeyer-Sauerland, M.; Waldmann, A.; Zeissig, S.R.; Doege, D.; et al. Return to work after cancer. A multi-regional population-based study from Germany. *Acta Oncol.* **2019**, *58*, 811–818, doi:10.1080/0284186X.2018.1557341.
5. Barbaret, C.; Brosse, C.; Rhondali, W.; Ruer, M.; Monsarrat, L.; Michaud, P.; Schott, A.M.; Delgado-Guay, M.; Bruera, E.; Sanchez, S.; et al. Financial distress in patients with advanced cancer. *PLoS One* **2017**, *12*, e0176470, doi:10.1371/journal.pone.0176470.
6. Barbaret, C.; Delgado-Guay, M.O.; Sanchez, S.; Brosse, C.; Ruer, M.; Rhondali, W.; Monsarrat, L.; Michaud, P.; Schott, A.M.; Bruera, E.; et al. Inequalities in Financial Distress, Symptoms, and Quality of Life Among Patients with Advanced Cancer in France and the U.S. *Oncologist* **2019**, *24*, 1121–1127, doi:10.1634/theoncologist.2018-0353.
7. Büttner, M.; König, H.-H.; Löbner, M.; Briest, S.; Konnopka, A.; Dietz, A.; Riedel-Heller, S.; Singer, S. Out-of-pocket-payments and the financial burden of 502 cancer patients of working age in Germany: results from a longitudinal study. *Support. Care Cancer* **2019**, *27*, 2221–2228, doi:10.1007/s00520-018-4498-1.
8. Doege, D.; Thong, M.S.-Y.; Koch-Gallenkamp, L.; Bertram, H.; Eberle, A.; Holleczeck, B.; Pritzkeleit, R.; Waldeyer-Sauerland, M.; Waldmann, A.; Zeissig, S.R.; et al. Health-related quality of life in long-term disease-free breast cancer survivors versus female population controls in Germany. *Breast Cancer Res. Treat.* **2019**, *175*, 499–510, doi:10.1007/s10549-019-05188-x.
9. Egestad, H.; Nieder, C. Undesirable financial effects of head and neck cancer radiotherapy during the initial treatment period. *Int. J. Circumpolar Health* **2015**, *74*, 26686, doi:10.3402/ijch.v74.26686.
10. Ezeife, D.A.; Morganstein, B.J.; Lau, S.; Law, J.H.; Le, L.W.; Bredle, J.; Cella, D.; Doherty, M.K.; Bradbury, P.; Liu, G.; et al. Financial Burden Among Patients With Lung Cancer in a Publically Funded Health Care System. *Clin. Lung Cancer* **2019**, *20*, 231–236, doi:10.1016/j.clc.2018.12.010.
11. Gordon, L.G.; Walker, S.M.; Mervin, M.C.; Lowe, A.; Smith, D.P.; Gardiner, R.A.; Chambers, S.K. Financial toxicity: a potential side effect of prostate cancer treatment among Australian men. *Eur. J. Cancer Care (Engl)* **2017**, *26*, doi:10.1111/ecc.12392.
12. Gordon, L.G.; Beesley, V.L.; Mihala, G.; Koczwara, B.; Lynch, B.M. Reduced employment and financial hardship among middle-aged individuals with colorectal cancer. *Eur. J. Cancer Care (Engl)* **2017**, *26*, doi:10.1111/ecc.12744.
13. Gordon, L.G.; Elliott, T.M.; Wakelin, K.; Leyden, S.; Leyden, J.; Michael, M.; Pavlakis, N.; Mumford, J.; Segelov, E.; Wyld, D.K. The Economic Impact on Australian Patients with Neuroendocrine Tumours. *Patient* **2020**, *13*, 363–373, doi:10.1007/s40271-020-00412-z.
14. Hanly, P.; Maguire, R.; Ceilleachair, A.O.; Sharp, L. Financial hardship associated with colorectal cancer survivorship: The role of asset depletion and debt accumulation. *Psychooncology* **2018**, *27*, 2165–2171, doi:10.1002/pon.4786.
15. Honda, K.; Gyawali, B.; Ando, M.; Kumanishi, R.; Kato, K.; Sugiyama, K.; Mitani, S.; Masuishi, T.; Narita, Y.; Bando, H.; et al. Prospective Survey of Financial Toxicity Measured by the Comprehensive Score for Financial Toxicity in Japanese Patients With Cancer. *J. Glob. Oncol.* **2019**, *5*, 1–8, doi:10.1200/JGO.19.00003.
16. Ivanauskienė, R.; Padaiga, Ž.; Šimoliūnienė, R.; Smilytė, G.; Domeikienė, A. Well-being of newly diagnosed women with breast cancer: which factors matter more? *Support. Care Cancer* **2014**, *22*, 519–526, doi:10.1007/s00520-013-2005-2.
17. Kaptein, A.A.; Yamaoka, K.; Snoei, L.; van der Kloot, W.A.; Inoue, K.; Tabei, T.; Kroep, J.R.; Krol-Warmerdam, E.; Ranke, G.; Meirink, C.; et al. Illness perceptions and quality of life in Japanese and Dutch women with breast cancer. *J. Psychosoc. Oncol.* **2013**, *31*, 83–102, doi:10.1080/07347332.2012.741092.
18. Koch, L.; Jansen, L.; Herrmann, A.; Stegmaier, C.; Holleczeck, B.; Singer, S.; Brenner, H.; Arndt, V. Quality of life in long-term breast cancer survivors - a 10-year longitudinal population-based study. *Acta Oncol.* **2013**, *52*, 1119–1128, doi:10.3109/0284186X.2013.774461.
19. Koskinen, J.-P.; Färkkilä, N.; Sintonen, H.; Saarto, T.; Taari, K.; Roine, R.P. The association of financial difficulties and out-of-pocket payments with health-related quality of life among breast, prostate and colorectal cancer patients. *Acta Oncol.* **2019**, *58*, 1062–1068, doi:10.1080/0284186X.2019.1592218.
20. Lu, L.; O'Sullivan, E.; Sharp, L. Cancer-related financial hardship among head and neck cancer survivors: Risk factors and associations with health-related quality of life. *Psychooncology* **2019**, *28*, 863–871, doi:10.1002/pon.5034.
21. Mandaliya, H.; Ansari, Z.; Evans, T.; Oldmeadow, C.; George, M. Psychosocial Analysis of Cancer Survivors in Rural Australia: Focus on Demographics, Quality of Life and Financial Domains. *Asian Pac. J. Cancer Prev.* **2016**, *17*, 2459–2464.
22. McLean, L.; Hong, W.; McLachlan, S.-A. Financial toxicity in patients with cancer attending a public Australian tertiary hospital: A pilot study. *Asia Pac. J. Clin. Oncol.* **2020**, doi:10.1111/ajco.13448.
23. McNeil, R.J.; McCarthy, M.; Dunt, D.; Thompson, K.; Kosola, S.; Orme, L.; Drew, S.; Sawyer, S. Financial Challenges of Cancer for Adolescents and Young Adults and Their Parent Caregivers. *Social Work Research* **2019**, *43*, 17–30, doi:10.1093/swr/svy027.

24. Mehlis, K.; Witte, J.; Surmann, B.; Kudlich, M.; Apostolidis, L.; Walther, J.; Jäger, D.; Greiner, W.; Winkler, E.C. The patient-level effect of the cost of Cancer care - financial burden in German Cancer patients. *BMC Cancer* **2020**, *20*, 529, doi:10.1186/s12885-020-07028-4.
25. Mercadante, S.; Aielli, F.; Adile, C.; Bonanno, G.; Casuccio, A. Financial distress and its impact on symptom expression in advanced cancer patients. *Support. Care Cancer* **2021**, *29*, 485–490, doi:10.1007/s00520-020-05507-9.
26. Paul, C.L.; Hall, A.E.; Carey, M.L.; Cameron, E.C.; Clinton-McHarg, T. Access to care and impacts of cancer on daily life: do they differ for metropolitan versus regional hematological cancer survivors? *J. Rural Health* **2013**, *29*, Suppl 1, s43–50, doi:10.1111/jrh.12020.
27. Pearce, A.; Tomalin, B.; Kaambwa, B.; Horevoorts, N.; Duijts, S.; Mols, F.; van de Poll-Franse, L.; Koczwara, B. Financial toxicity is more than costs of care: the relationship between employment and financial toxicity in long-term cancer survivors. *J. Cancer Surviv.* **2019**, *13*, 10–20, doi:10.1007/s11764-018-0723-7.
28. Schmidt, M.E.; Scherer, S.; Wiskemann, J.; Steindorf, K. Return to work after breast cancer: The role of treatment-related side effects and potential impact on quality of life. *Eur. J. Cancer Care (Engl)* **2019**, *28*, e13051, doi:10.1111/ecc.13051.
29. Sharp, L.; Timmons, A. Pre-diagnosis employment status and financial circumstances predict cancer-related financial stress and strain among breast and prostate cancer survivors. *Support. Care Cancer* **2016**, *24*, 699–709, doi:10.1007/s00520-015-2832-4.
30. Zucca, A.; Boyes, A.; Newling, G.; Hall, A.; Girgis, A. Travelling all over the countryside: travel-related burden and financial difficulties reported by cancer patients in New South Wales and Victoria. *Aust. J. Rural Health* **2011**, *19*, 298–305, doi:10.1111/j.1440-1584.2011.01232.x.
31. Amir, Z.; Wilson, K.; Hennings, J.; Young, A. The meaning of cancer: implications for family finances and consequent impact on lifestyle, activities, roles and relationships. *Psychooncology*. **2012**, *21*, 1167–1174, doi:10.1002/pon.2021.
32. Bennett, J.A.; Brown, P.; Cameron, L.; Whitehead, L.C.; Porter, D.; McPherson, K.M. Changes in employment and household income during the 24 months following a cancer diagnosis. *Support. Care Cancer* **2009**, *17*, 1057–1064, doi:10.1007/s00520-008-0540-z.
33. Fitch, M.; Longo, C.J. Exploring the impact of out-of-pocket costs on the quality of life of Canadian cancer patients. *J. Psychosoc. Oncol.* **2018**, *36*, 582–596, doi:10.1080/07347332.2018.1486937.
34. Fitch, M.I.; Longo, C.J.; Chan, R.J. Cancer patients' perspectives on financial burden in a universal healthcare system: Analysis of qualitative data from participants from 20 provincial cancer centers in Canada. *Patient Educ. Couns.* **2021**, *104*, 903–910, doi:10.1016/j.pec.2020.08.013.
35. Gray, R.E.; James, P.; Manthorne, J.; Gould, J.; Fitch, M.I. A consultation with Canadian rural women with breast cancer. *Health Expect.* **2004**, *7*, 40–50, doi:10.1046/j.1369-6513.2003.00248.x.
36. Grinyer, A. The biographical impact of teenage and adolescent cancer. *Chronic Illn.* **2007**, *3*, 265–277, doi:10.1177/1742395307085335.
37. Kane, D.; Rajacich, D.; Andary, C. Experiences of cancer patients' return to work. *Can. Oncol. Nurs. J.* **2020**, *30*, 113–118, doi:10.5737/23688076302113118.
38. McGrath, P.; Patterson, C.; Yates, P.; Treloar, S.; Oldenburg, B.; Loos, C. A study of postdiagnosis breast cancer concerns for women living in rural and remote Queensland. Part II: Support issues. *Aust. J. Rural Health* **1999**, *7*, 43–52, doi:10.1046/j.1440-1584.1999.00216.x.
39. McGrath, P. "It's horrendous—but really, what can you do?" Preliminary findings on financial impact of relocation for specialist treatment. *Aust. Health Rev.* **2000**, *23*, 94–103, doi:10.1071/ah000094.
40. Moffatt, S.; Noble, E.; Exley, C. "Done more for me in a fortnight than anybody done in all me life." How welfare rights advice can help people with cancer. *BMC Health Serv. Res.* **2010**, *10*, 259, doi:10.1186/1472-6963-10-259.
41. Moffatt, S.; Noble, E.; White, M. Addressing the financial consequences of cancer: qualitative evaluation of a welfare rights advice service. *PLoS One* **2012**, *7*, e42979, doi:10.1371/journal.pone.0042979.
42. Moffatt, S.; Noble, E. Work or welfare after cancer? Explorations of identity and stigma. *Sociol. Health Illn.* **2015**, *37*, 1191–1205, doi:10.1111/1467-9566.12303.
43. Schröder, S.L.; Schumann, N.; Fink, A.; Richter, M. Coping mechanisms for financial toxicity: a qualitative study of cancer patients' experiences in Germany. *Support. Care Cancer* **2020**, *28*, 1131–1139, doi:10.1007/s00520-019-04915-w.
44. Slavova-Azmanova, N.S.; Newton, J.C.; Saunders, C.; Johnson, C.E. 'Biggest factors in having cancer were costs and no entitlement to compensation'-The determinants of out-of-pocket costs for cancer care through the lenses of rural and outer metropolitan Western Australians. *Aust. J. Rural Health* **2020**, *28*, 588–602, doi:10.1111/ajr.12686.
45. Timmons, A.; Gooberman-Hill, R.; Sharp, L. "It's at a time in your life when you are most vulnerable": a qualitative exploration of the financial impact of a cancer diagnosis and implications for financial protection in health. *PLoS One* **2013**, *8*, e77549, doi:10.1371/journal.pone.0077549.
46. Timmons, A.; Gooberman-Hill, R.; Sharp, L. The multidimensional nature of the financial and economic burden of a cancer diagnosis on patients and their families: qualitative findings from a country with a mixed public-private healthcare system. *Support. Care Cancer* **2013**, *21*, 107–117, doi:10.1007/s00520-012-1498-4.
